# Supplementary material for: 6‐Substituted 2‐Aminopurine‐2′‐deoxyribonucleoside 5′‐Triphosphates that Trace Cytosine Methylation
Source: PubMed Central journal article supplement — Chembiochem. 2016 Jul 6;17(16):1532–40. doi: 10.1002/cbic.201600245 (PMC5095873; doi:10.1002/cbic.201600245), 2016-07-06
Supplement: CBIC-17-1532-s001.pdf [file CBIC-17-1532-s001.pdf]

## Supporting Information

### **6-Substituted 2-Aminopurine-2'-deoxyribonucleoside 5'-Triphosphates that Trace Cytosine Methylation**

Janina von Watzdorf and Andreas Marx<sup>\*[a]</sup>

cbic\_201600245\_sm\_miscellaneous\_information.pdf

## Biochemical methods

Oligonucleotides were purchased from Biomers in HPLC grade and used directly for primer extension experiments.

### Quantification of oligonucleotides

Quantification of oligonucleotides was conducted by measuring absorbance at 260 nm in water.

### 5'-Radioactive labelling of oligonucleotides

DNA oligonucleotide primers were radioactively labelled at the 5' terminus by usage of [ $\gamma$ - $^{32}$ P]-ATP and T4 PNK. The reactions contained 0.4  $\mu$ M primer, 1 x PNK reaction buffer, 0.8  $\mu$ Ci/ $\mu$ l [ $\gamma$ - $^{32}$ P]-ATP and 0.4 U/ $\mu$ L T4 PNK in a total volume of 50  $\mu$ L. The reaction mixture was incubated at 37 °C and stopped after 1 h by denaturation of the T4 PNK for 2 min at 95 °C. Buffer and excess [ $\gamma$ - $^{32}$ P]-ATP were removed by gel filtration (MicroSpin Sephadex G-25). Addition of 20  $\mu$ l of unlabelled primer (10  $\mu$ M) led to a final concentration of 3  $\mu$ M of diluted radioactive labelled primer.

### Primer extension assay

The mixture of 150 nM of a [ $\gamma$ - $^{32}$ P]-labeled primer (5'-d(CGA AAT GAT CCC ATC CAG CTG C)-3' and 200 nM of either template (5'-d(CCG CTG CCC ACC AGC CAT CAT GTC GGA CCC CGC GGT CAA CGX GCA GCT GGA TGG GAT CAT TTC GGA CT)-3', X = C/5mC) in buffer (*KOD* *exo*: 50 mM Tris-HCl pH 8.0, 16 mM (NH<sub>4</sub>)<sub>2</sub>SO<sub>4</sub>, 2.5 mM MgCl<sub>2</sub>, 0.1 % Tween 20; *KlenTaq*: 50 mM Tris-HCl, pH 9.2, 16 mM (NH<sub>4</sub>)<sub>2</sub>SO<sub>4</sub>, 1.75 mM MgCl<sub>2</sub>, 0.1 % Tween 20; *9°North* *exo*: 20 mM Tris-HCl pH 8.8, 10 mM (NH<sub>4</sub>)<sub>2</sub>SO<sub>4</sub>, 10 mM KCl, 2 mM MgCl<sub>2</sub>, 0.1 % Triton) was heated to 95 °C for 2 min and subsequently cooled to 4 °C for annealing. The respective polymerase was added and the reaction was started by addition of 50  $\mu$ M of the respective dNTP at 55 °C. Reactions (10  $\mu$ L) were stopped after the desired incubation time by addition of 10  $\mu$ L stop solution (80 % (v/v) formamide, 20 mM EDTA, 0.25 % (w/v) Bromophenol Blue, 0.25 % (w/v) xylene cyanol) and analysed by 12 % or 15 % denaturing PAGE. Visualization was performed by phosphorimaging.

### Gel electrophoresis

Denaturing polyacrylamide gels (12 or 15 %) were prepared by polymerization of a solution of bisacrylamide/acrylamide (12 % or 15 %) and urea (8.3 M) in TBE buffer using peroxydisulfate (APS, 0.08 %) and *N,N,N',N'*-tetramethylethylenediamine (TEMED, 0.04 %). After initiation of polymerization, the solution was filled in a sequencing gel chamber (Bio-Rad) and left for polymerization for at least 30 min. After addition of TBE buffer (1 x) to the electrophoresis unit, the gel was prewarmed by electrophoresis at 100 W for 20 min before samples were applied to the gel. After electrophoresis at 100 W for approximately 2.5 h, the gel was transferred to Whatman filter paper and dried at 80 °C under reduced pressure using a gel dryer (Model 583, Bio-Rad). The dried gel was exposed to an imager screen overnight and read out was performed using a molecular imager (FX, Bio-Rad). Quantification was done using the Bio-Rad software Image Lab.ink.

a)

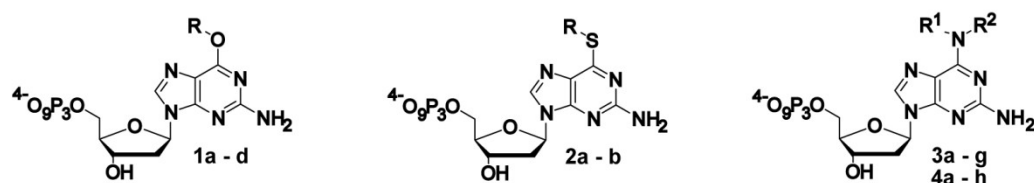

b)

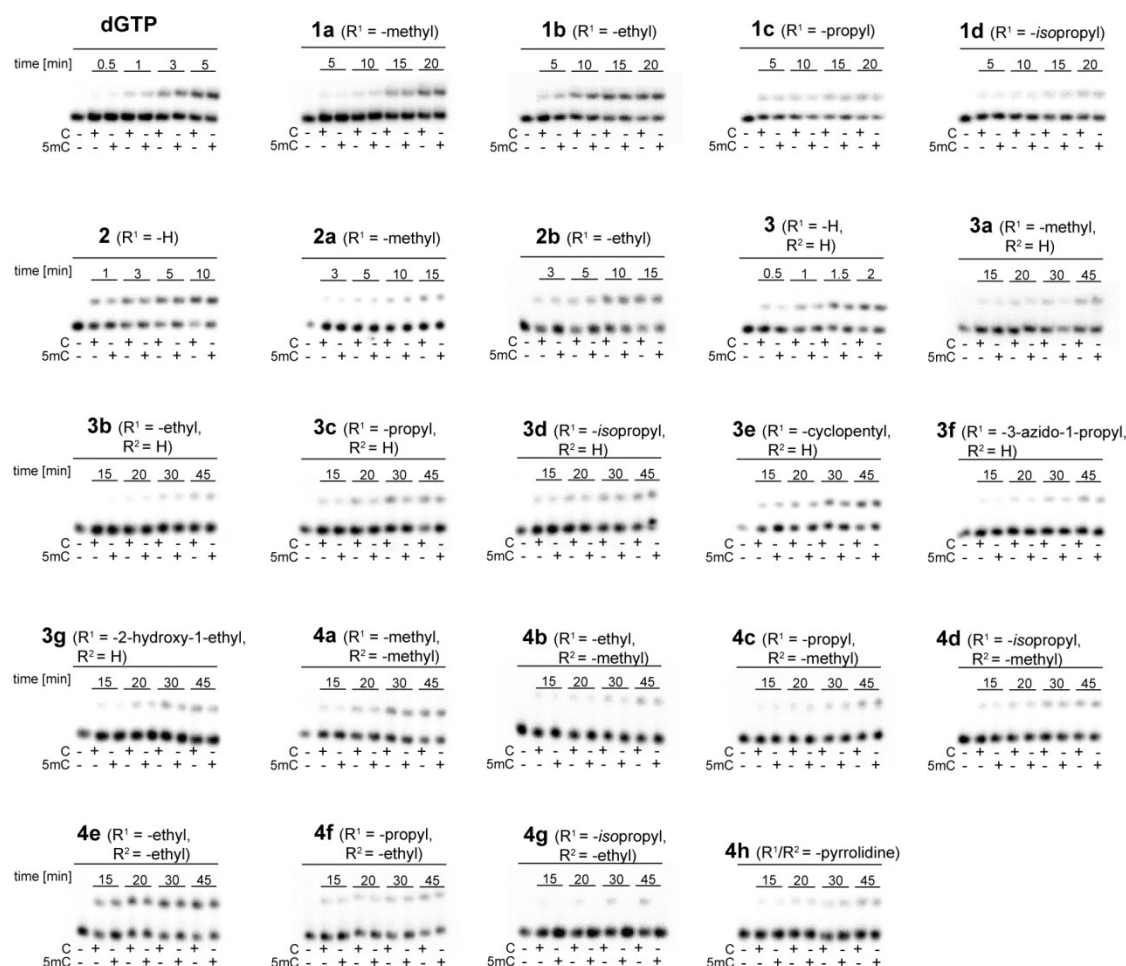

**Figure S1:** a) structures of modified nucleotides, b) PAGE analysis of single-nucleotide incorporation primer extension experiments of dGTP and modified nucleotides **1a - d**, **2**, **2a + b**, **3**, **3a - 3g** and **4a - h** opposite a template containing C in comparison to a template containing 5mC employing KlenTaq DNA polymerase. 100  $\mu\text{M}$  dGTP or dG\*TP and 0.1 nM KlenTaq were used, reactions were stopped after indicated timepoints.

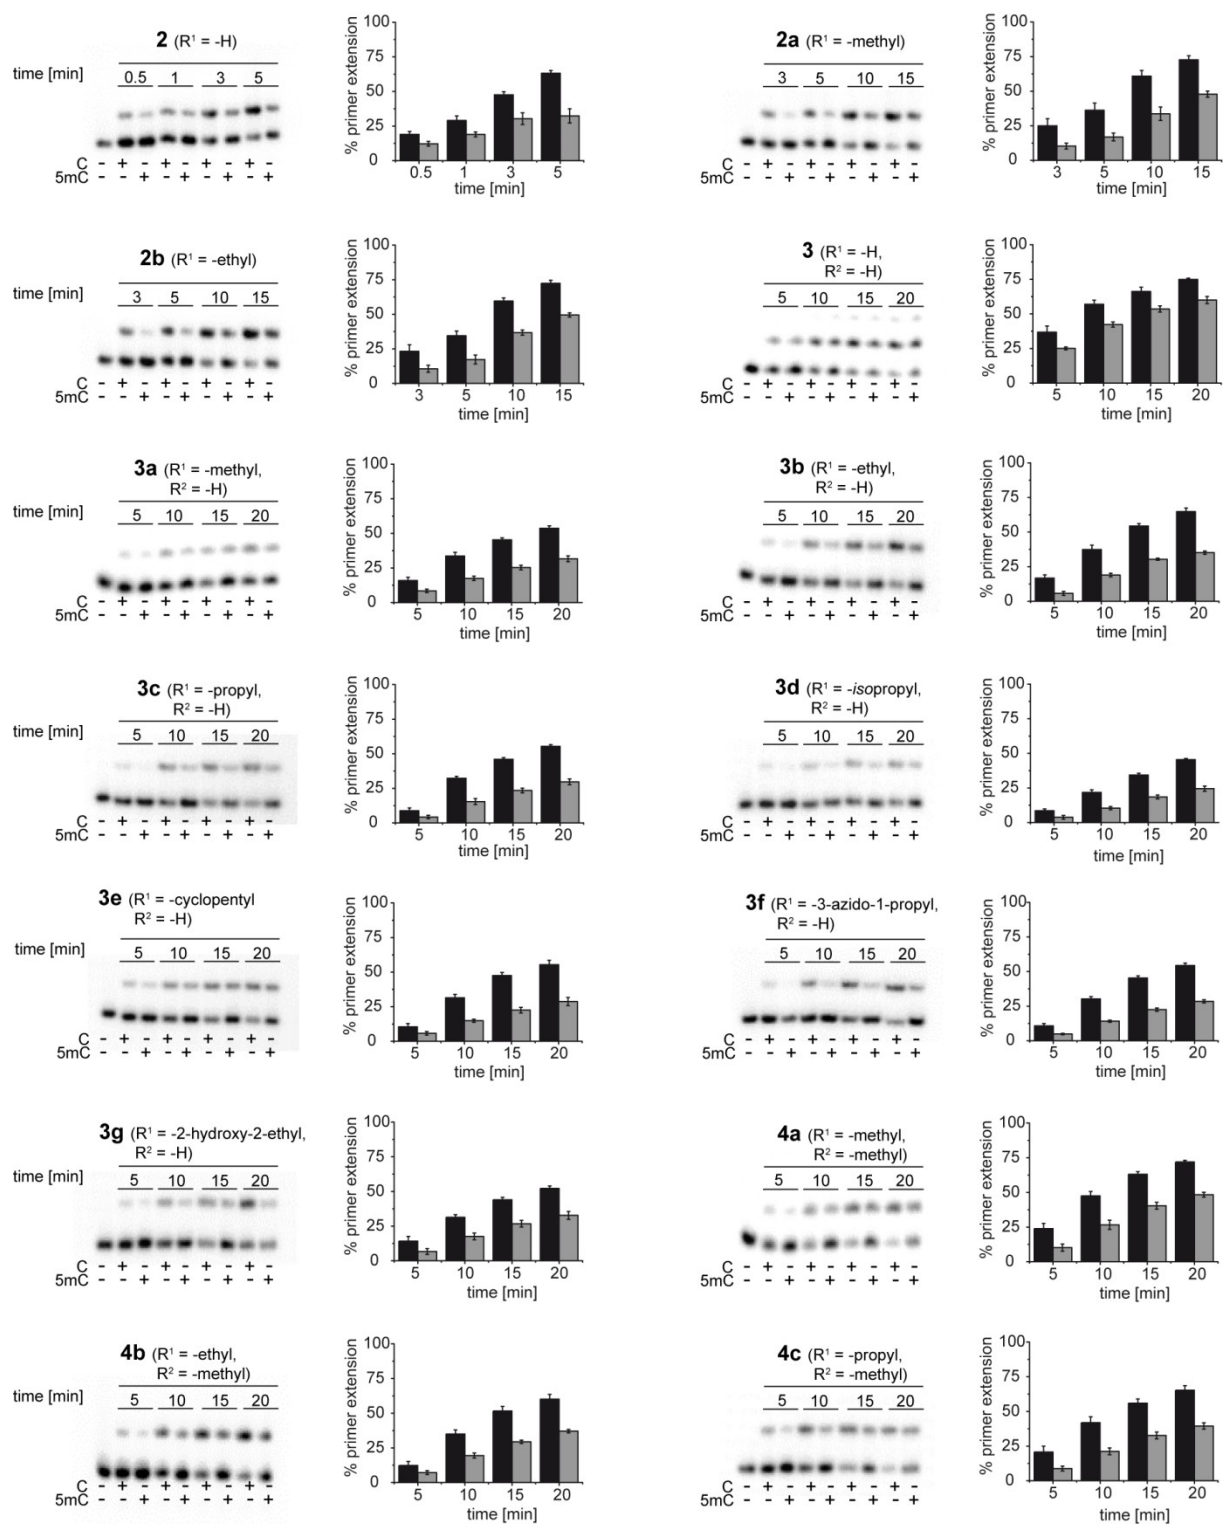

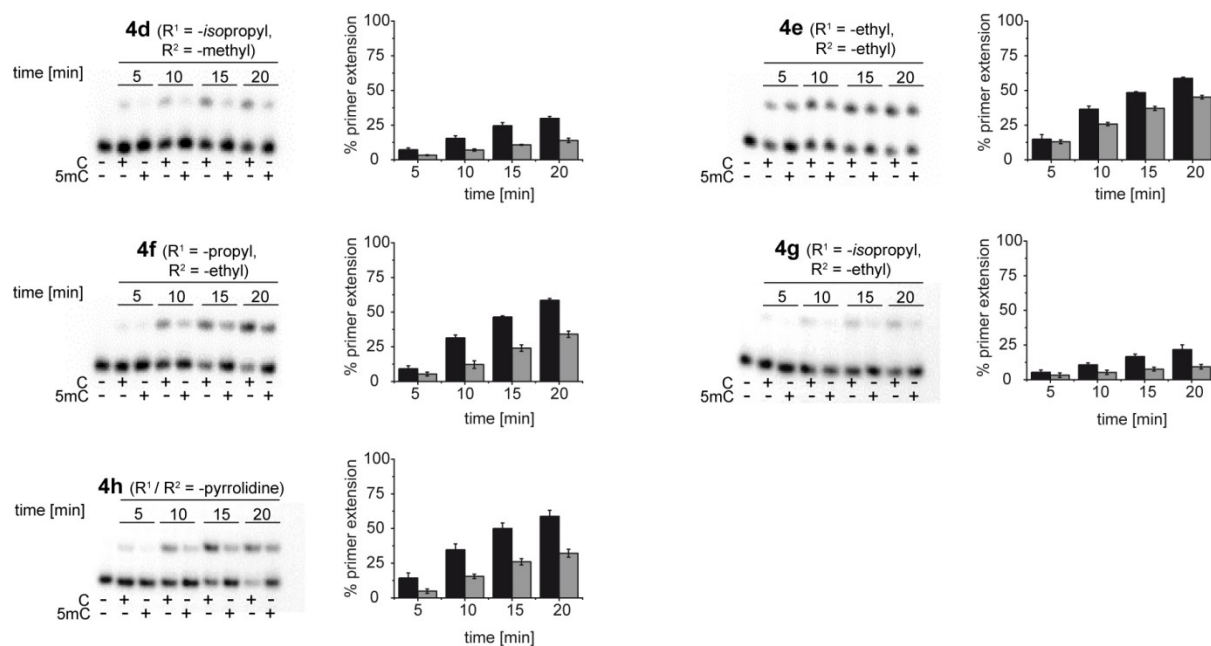

**Figure S2:** PAGE analysis of single-nucleotide incorporation primer extension experiments of dGTP and the modified nucleotides **2**, **2a + b**, **3**, **3a - 3g** and **4a - h** opposite a template containing C in comparison to a template containing 5mC employing KOD exo- DNA polymerase. 100  $\mu$ M dGTP or dG\*TP and 10 nM KOD exo- were used, reactions were stopped after indicated timepoints. Data points derive from triplicates.

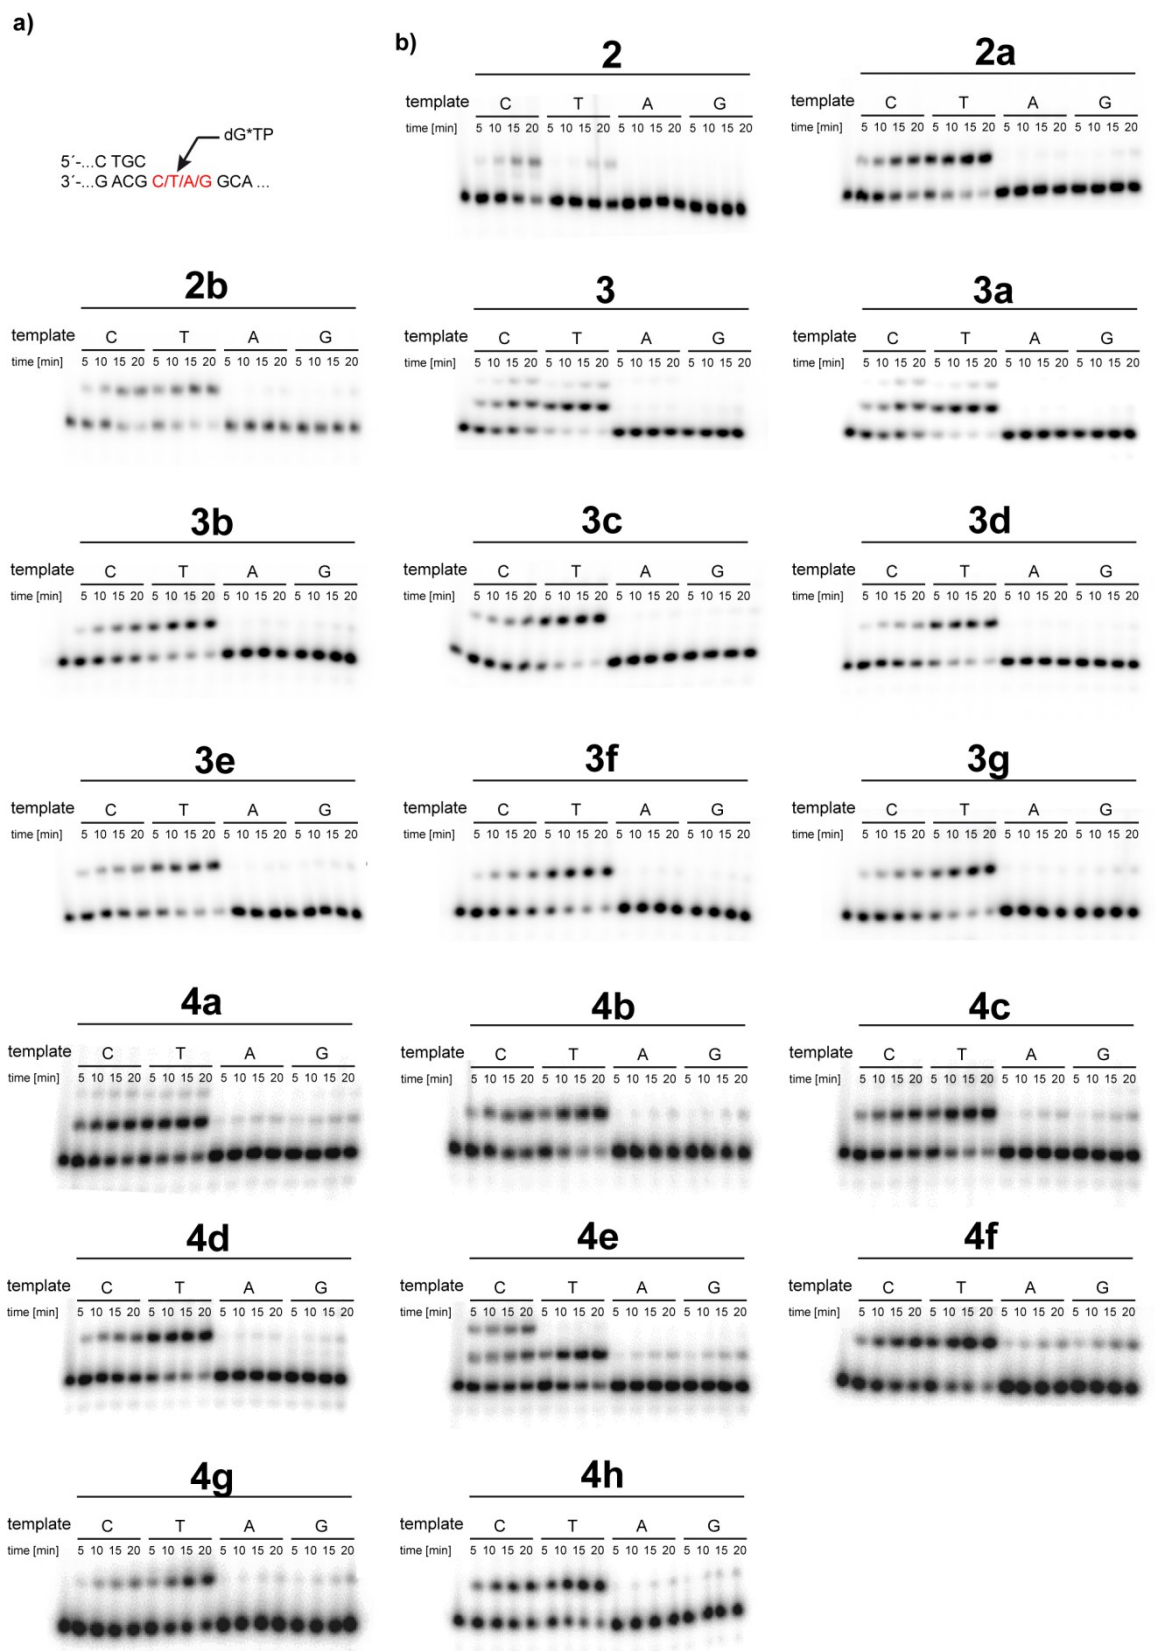

**Figure S3:** (a) Partial primer/ template sequence used (b) PAGE analysis of single-nucleotide incorporation primer extension experiments of nucleotides **2**, **2a + b**, **3**, **3a - 3g** and **4a - h** opposite a template containing C, T, A or G employing KOD exo- DNA polymerase. 100  $\mu$ M dG\*TP and 10 nM KOD exo- were used, reactions were stopped after indicated timepoints.

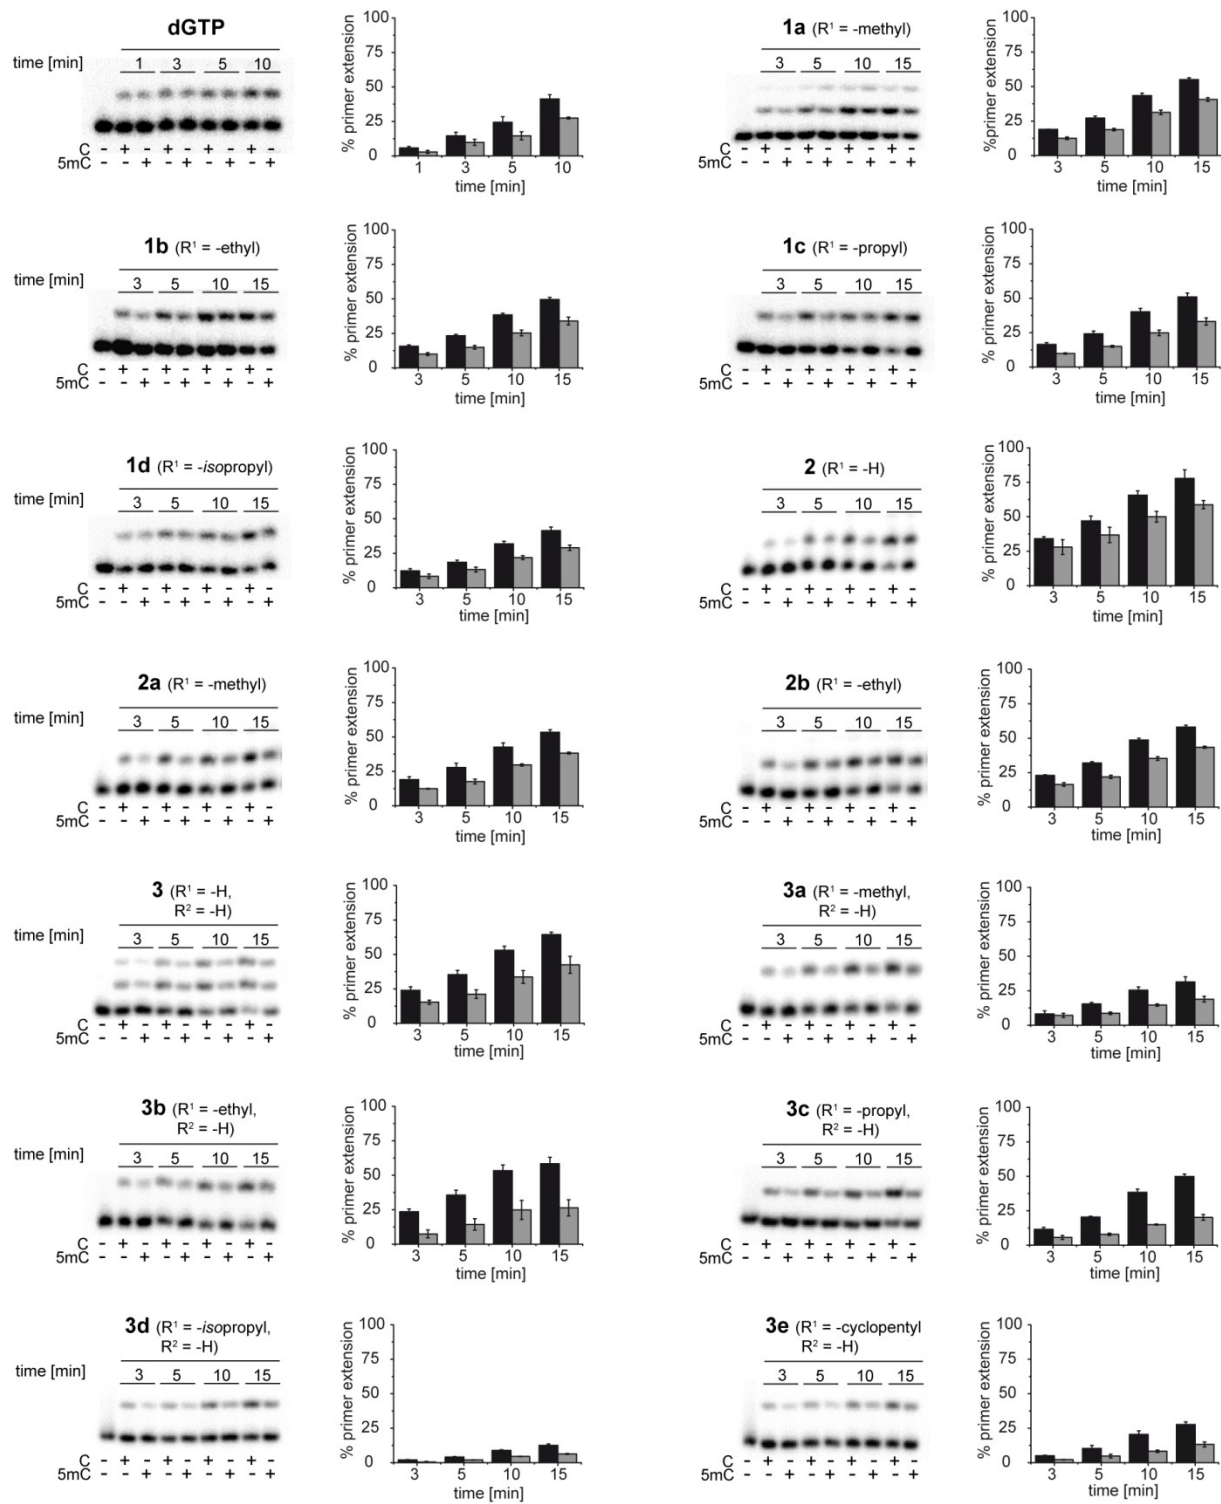

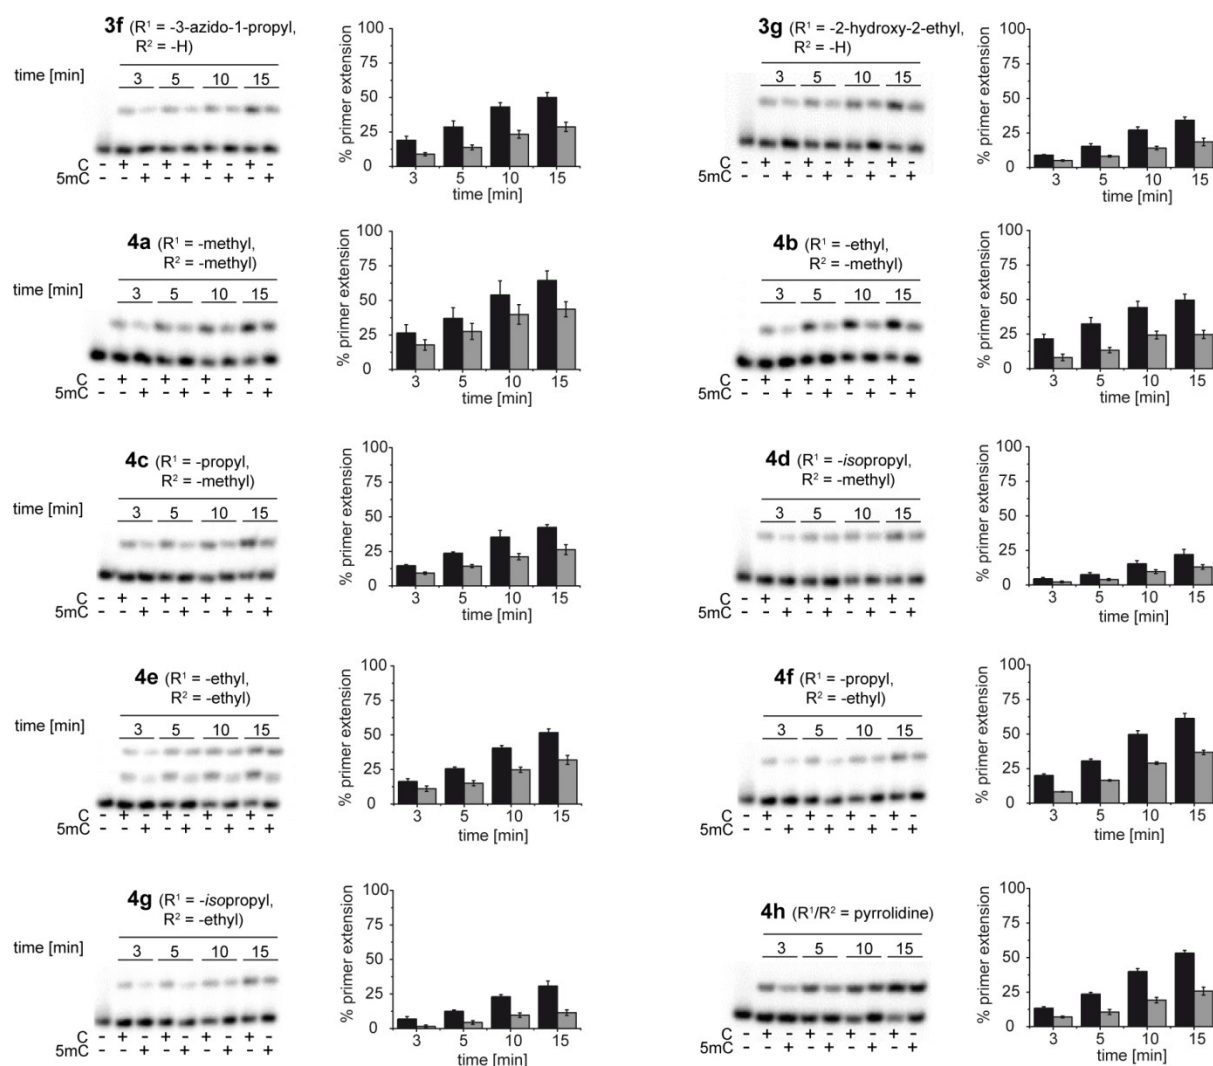

**Figure S4:** PAGE analysis of single-nucleotide incorporation primer extension experiments of nucleotides dGTP and modified nucleotides **1a - d**, **2**, **2a + b**, **3**, **3a - 3g** and **4a - h** opposite a template containing C in comparison to a template containing 5mC employing 9°North exo-DNA polymerase. 100  $\mu\text{M}$  dGTP or dG\*TP and 20 nM 9°North exo- were used, reactions were stopped after indicated timepoints. Data points derive from triplicates.

## **NMR – Spectra:**

$^1\text{H}$ -NMR (400 MHz,  $\text{d}_6$ -DMSO) of **2-Amino-6-ethylthiopurine (5b)**:

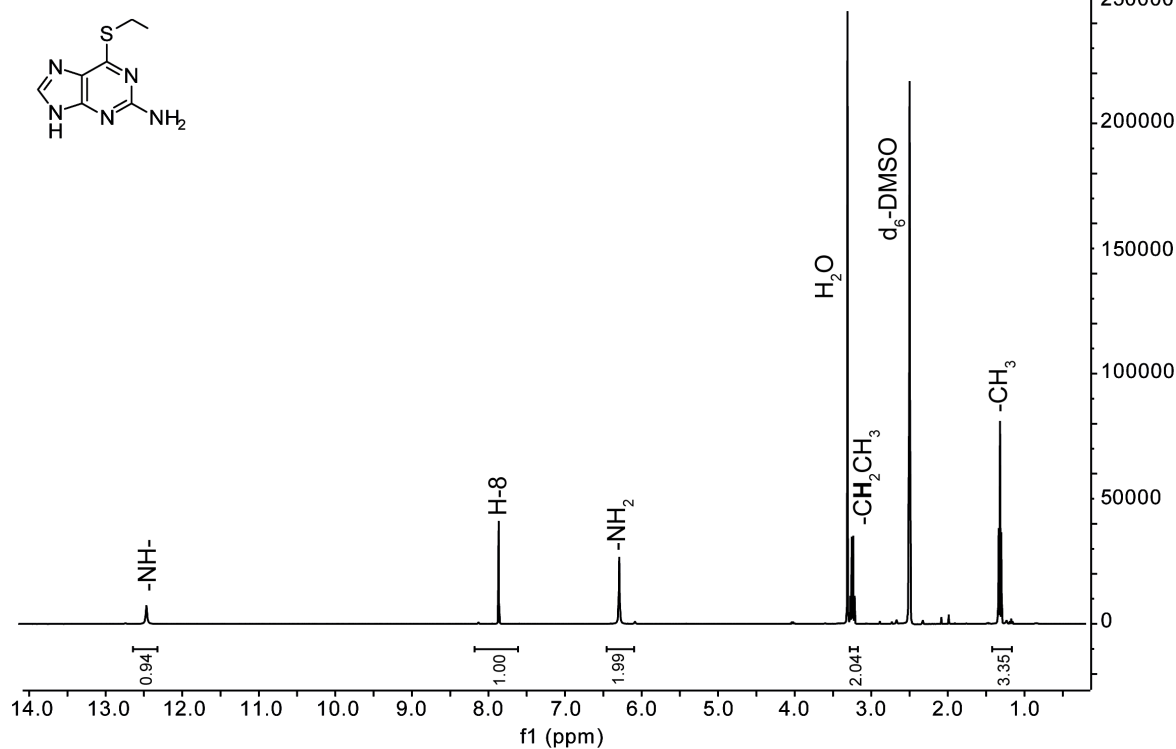

$^{13}\text{C}$ -NMR (100 MHz,  $\text{d}_6$ -DMSO) of **2-Amino-6-ethylthiopurine (5b)**:

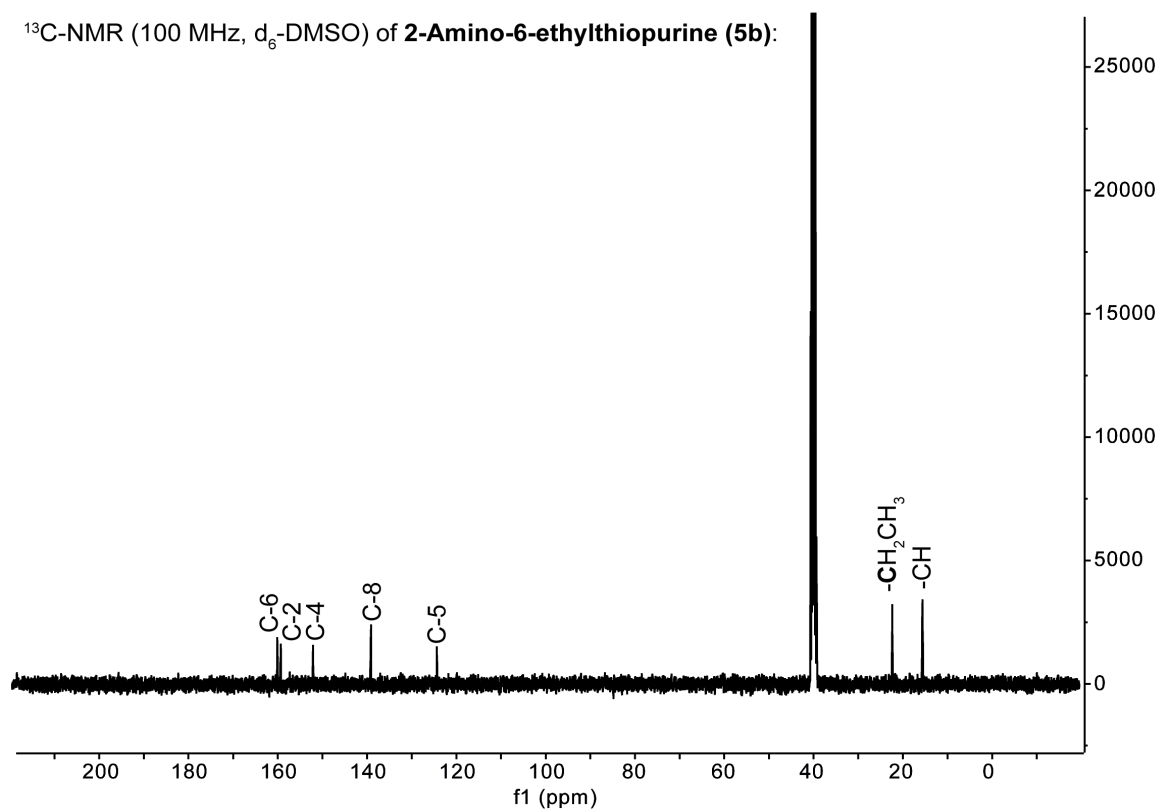

<sup>1</sup>H-NMR (400 MHz, CDCl<sub>3</sub>) of 3',5'-Di-O-toluoyl-6-ethylthio-2'-deoxyguanosine (6b):

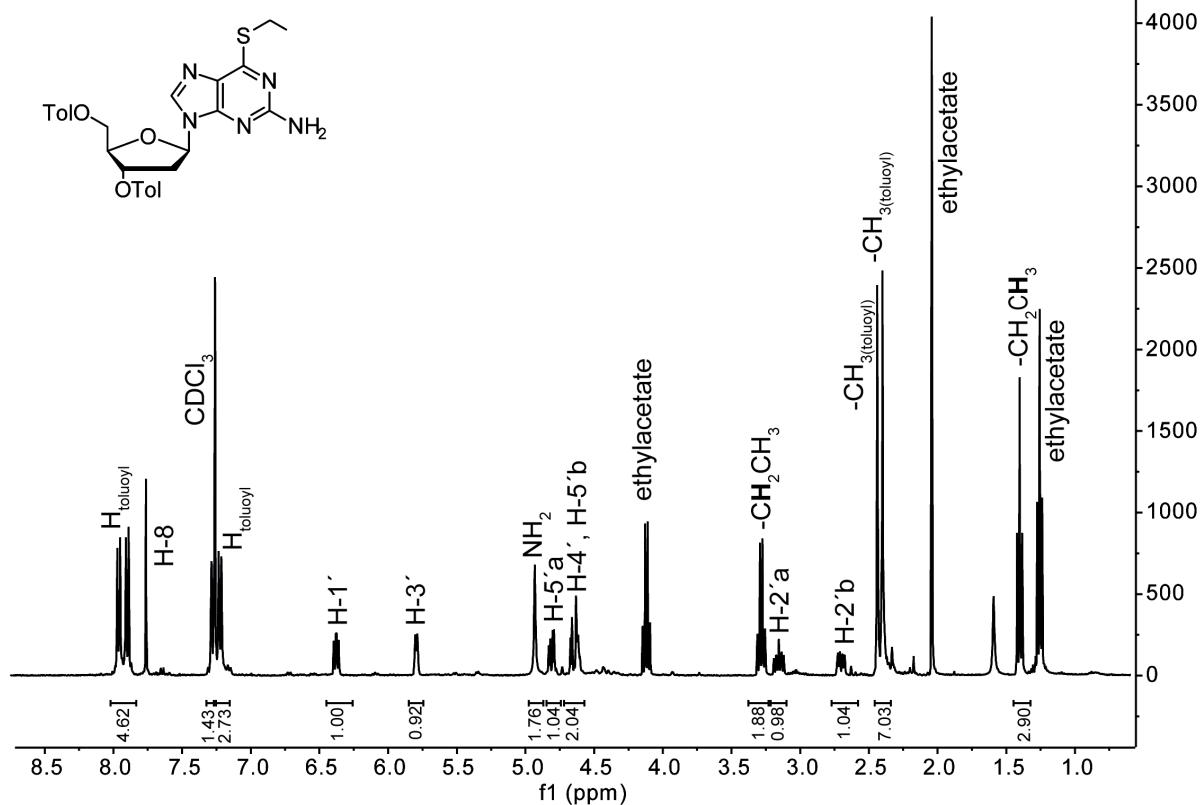

<sup>13</sup>C-NMR (100 MHz, d<sub>6</sub>-DMSO) of 6-Ethylthio-2'-deoxyguanosine (7b):

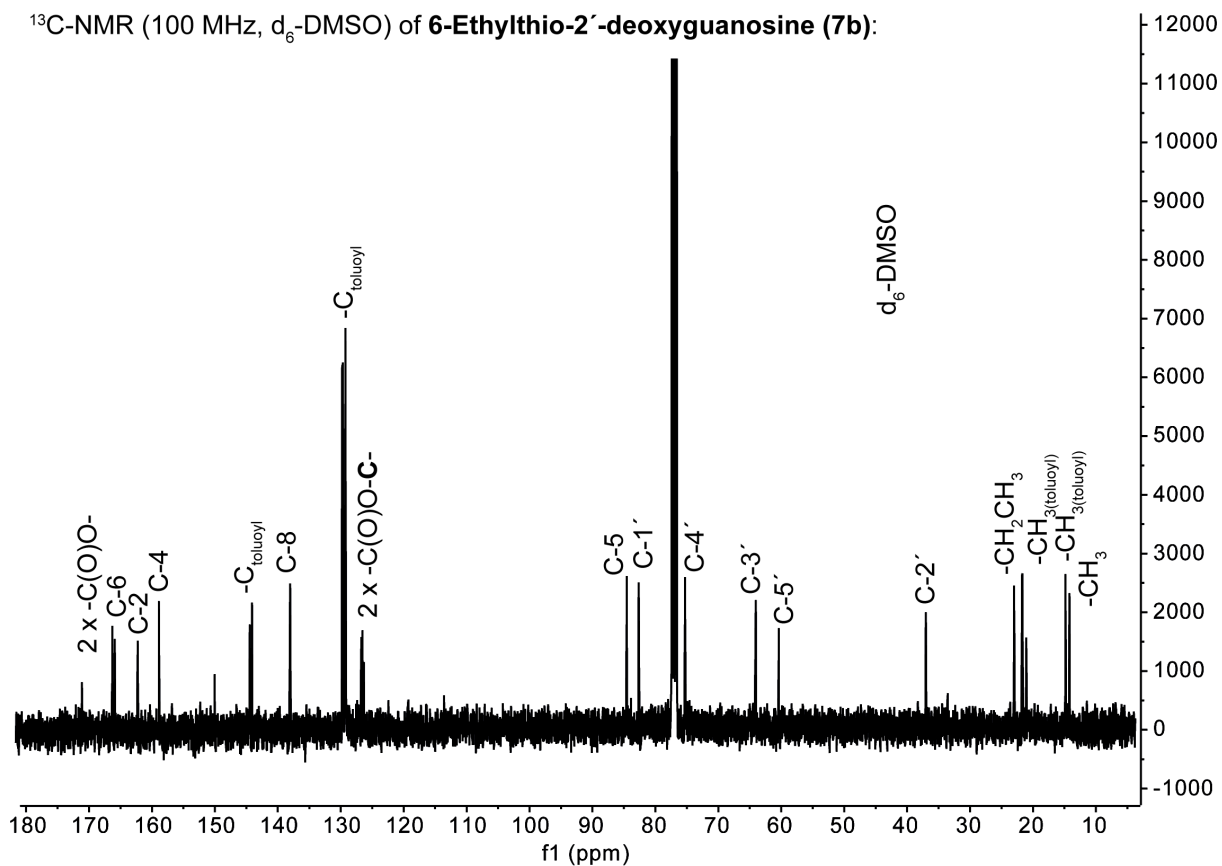

<sup>1</sup>H-NMR (400 MHz, d<sub>6</sub>-DMSO) of **6-Ethylthio-2'-deoxyguanosine (7b)**:

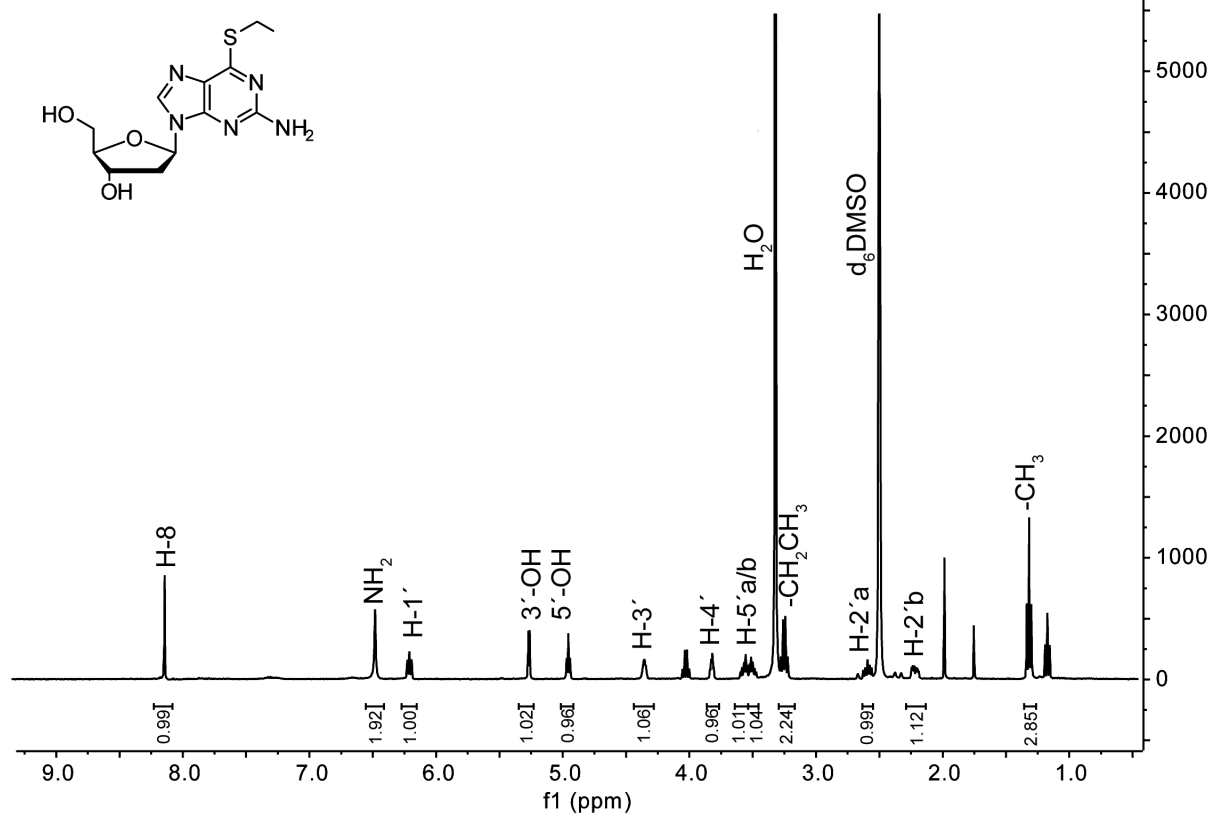

<sup>13</sup>C-NMR (100 MHz, d<sub>6</sub>-DMSO) of **6-Ethylthio-2'-deoxyguanosine (7b)**:

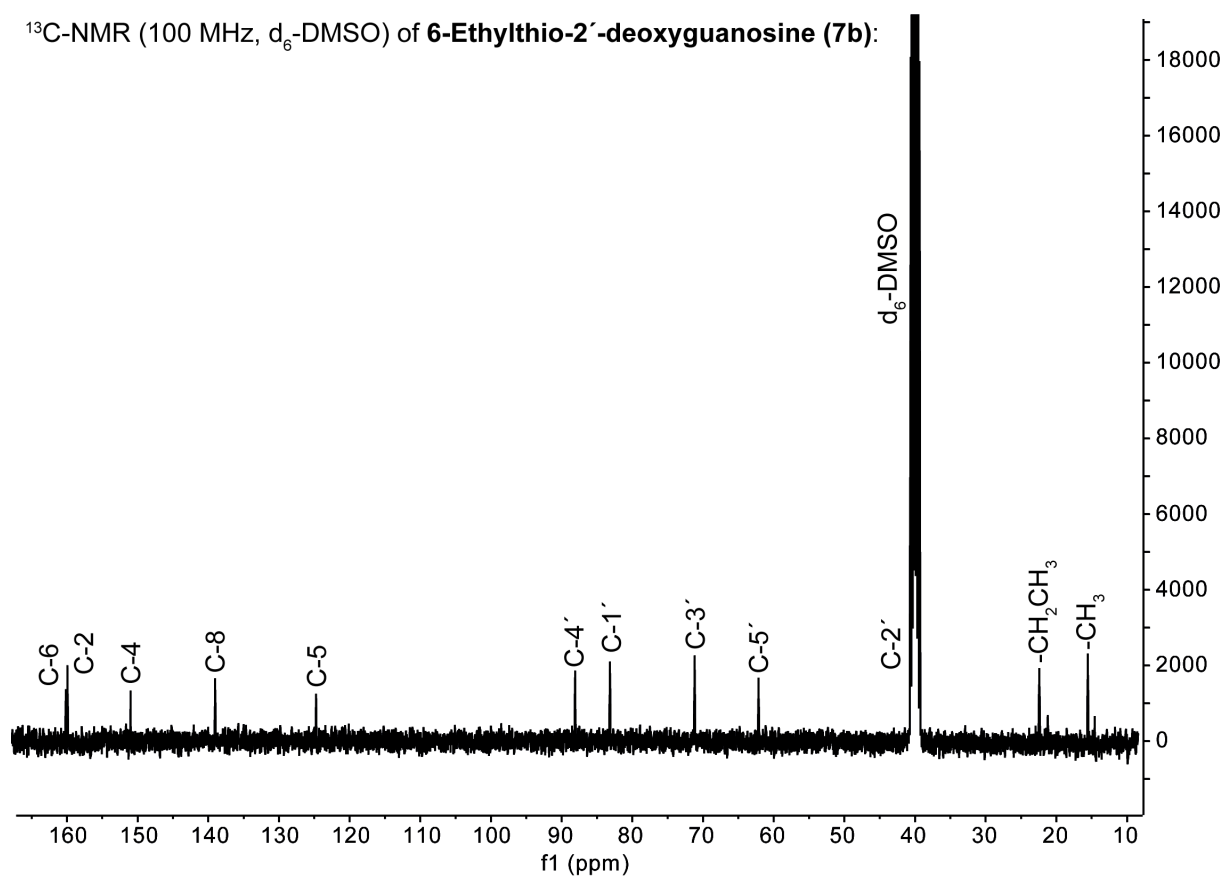

<sup>1</sup>H-NMR (400 MHz, d<sub>6</sub>-DMSO) of 3',5'-Di-O-tert-butyldimethylsilyl-6-chloro-2'-deoxyguanosine (8):

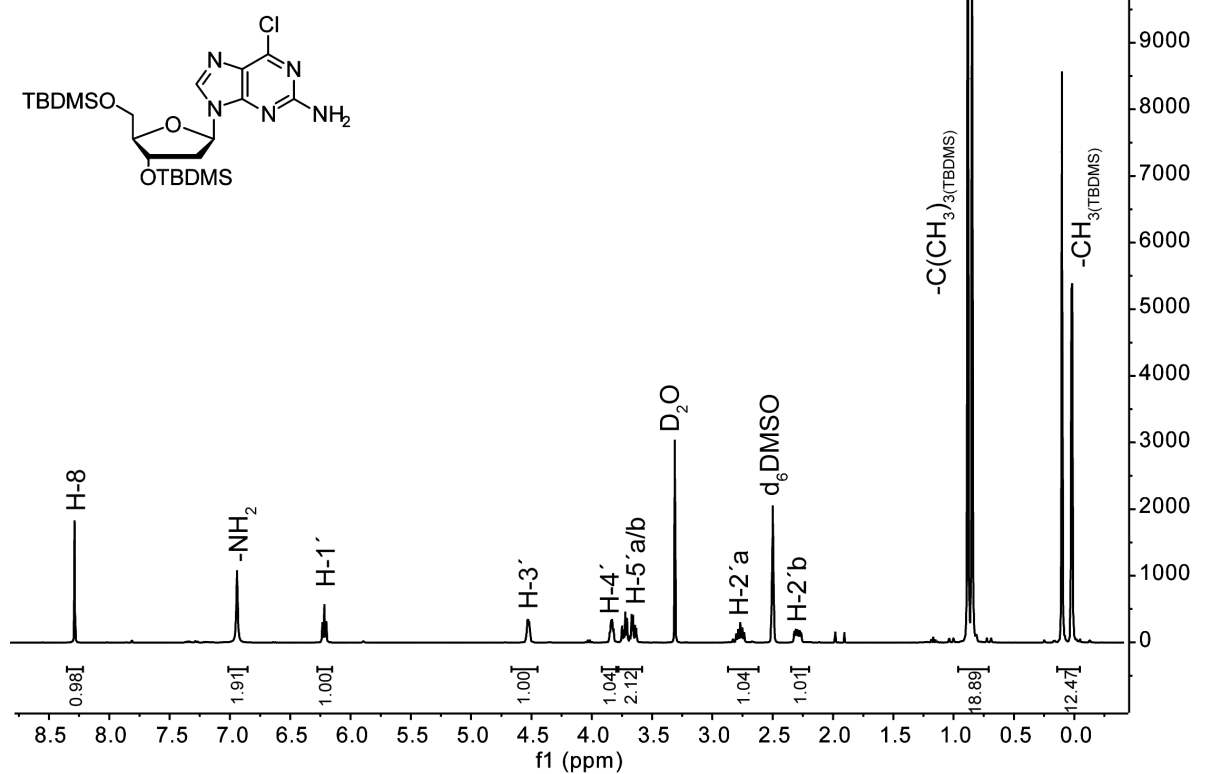

<sup>13</sup>C-NMR (100 MHz, d<sub>6</sub>-DMSO) of 3',5'-Di-O-tert-butyldimethylsilyl-6-chloro-2'-deoxyguanosine (8):

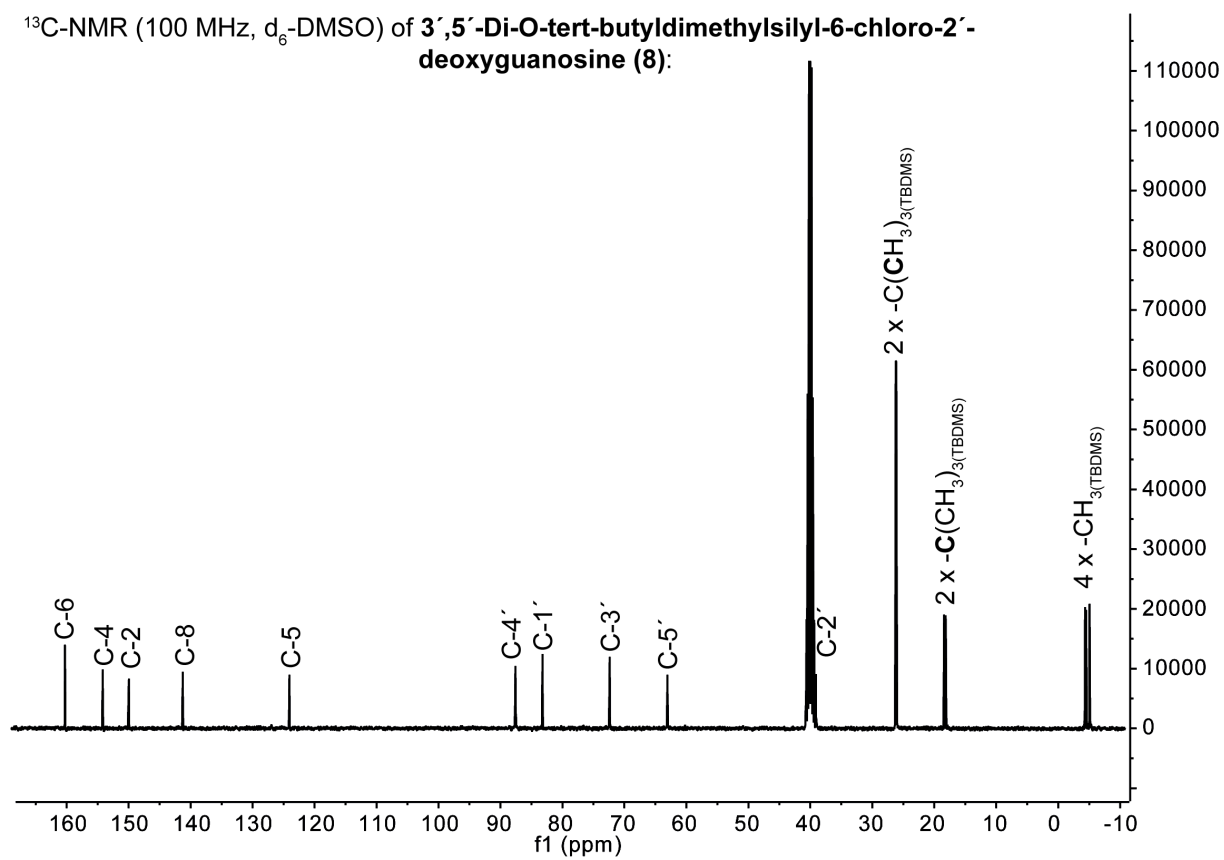

<sup>1</sup>H-NMR (400 MHz, d<sub>6</sub>-DMSO) of **6-Chloro-2'-deoxyguanosine (9)**:

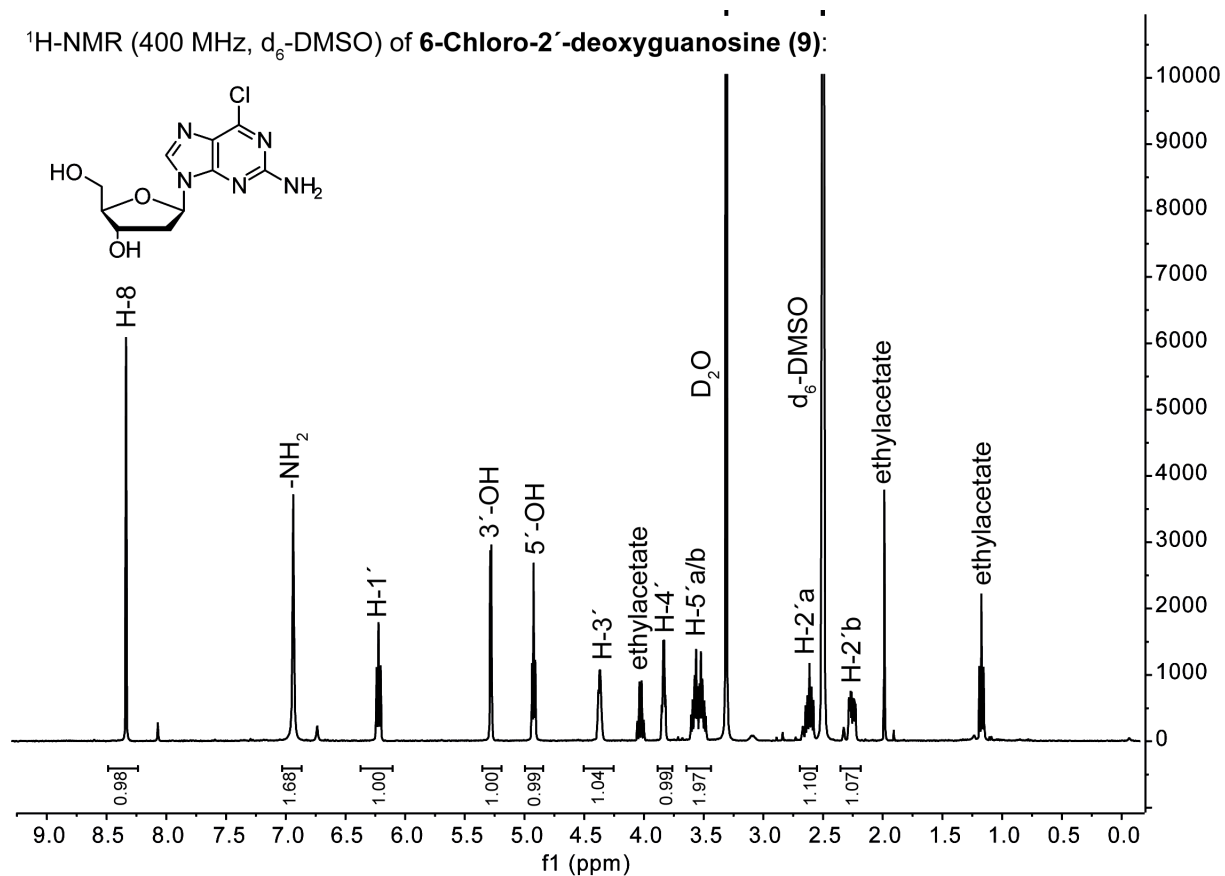

<sup>13</sup>C-NMR (100 MHz, d<sub>6</sub>-DMSO) of **6-Chloro-2'-deoxyguanosine (9)**:

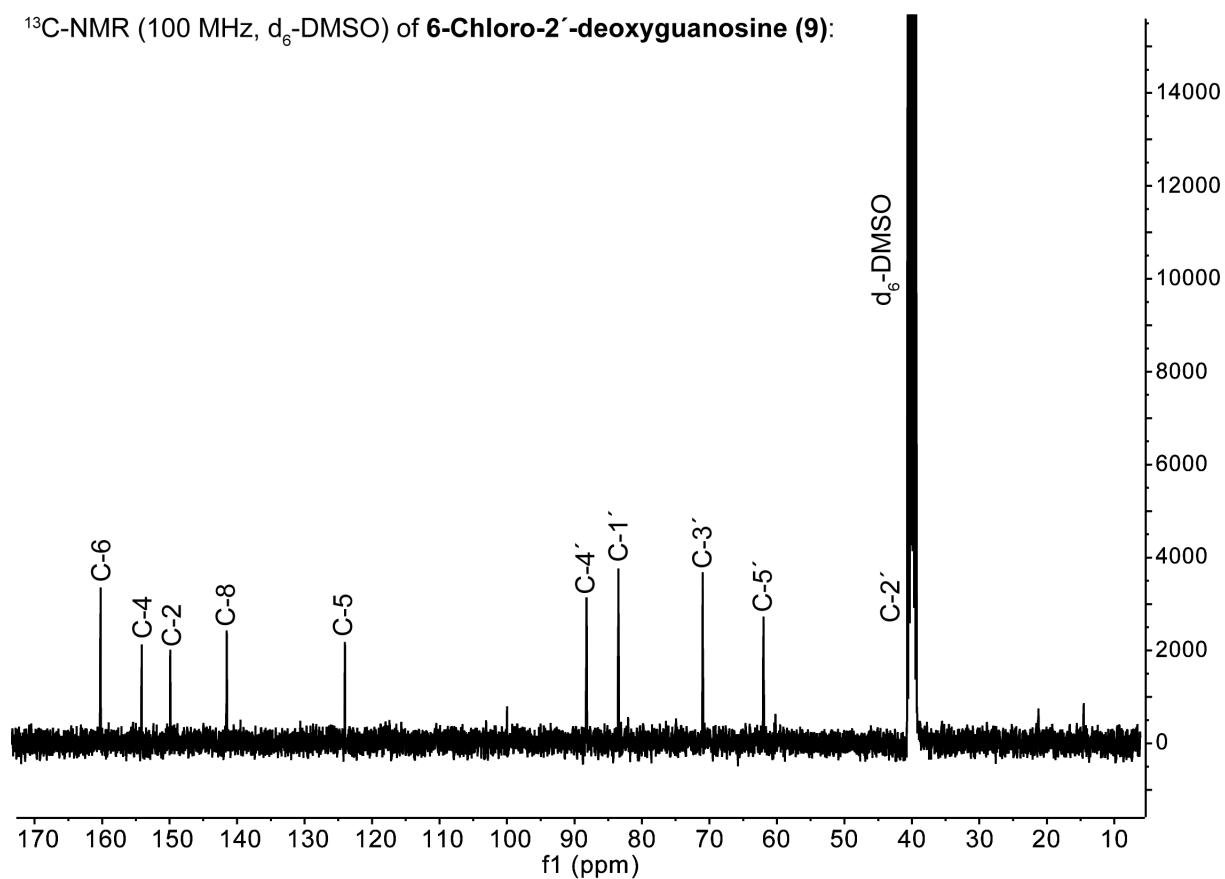

<sup>1</sup>H-NMR (400 MHz, D<sub>2</sub>O) of **6-Thioethyl-2'-deoxyguanosine-5'-O-triphosphate (2b)**:

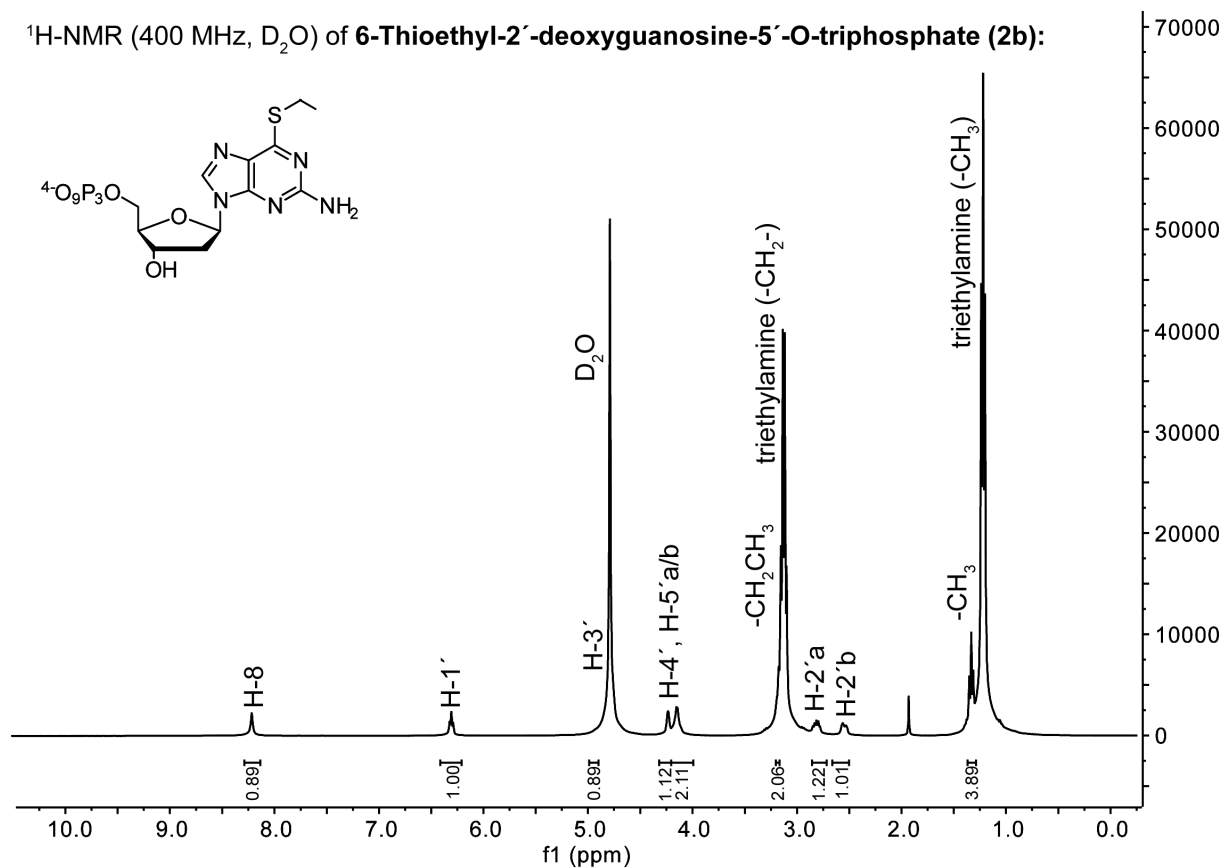

<sup>13</sup>C-NMR (100 MHz, D<sub>2</sub>O) of **6-Thioethyl-2'-deoxyguanosine-5'-O-triphosphate (2b)**:

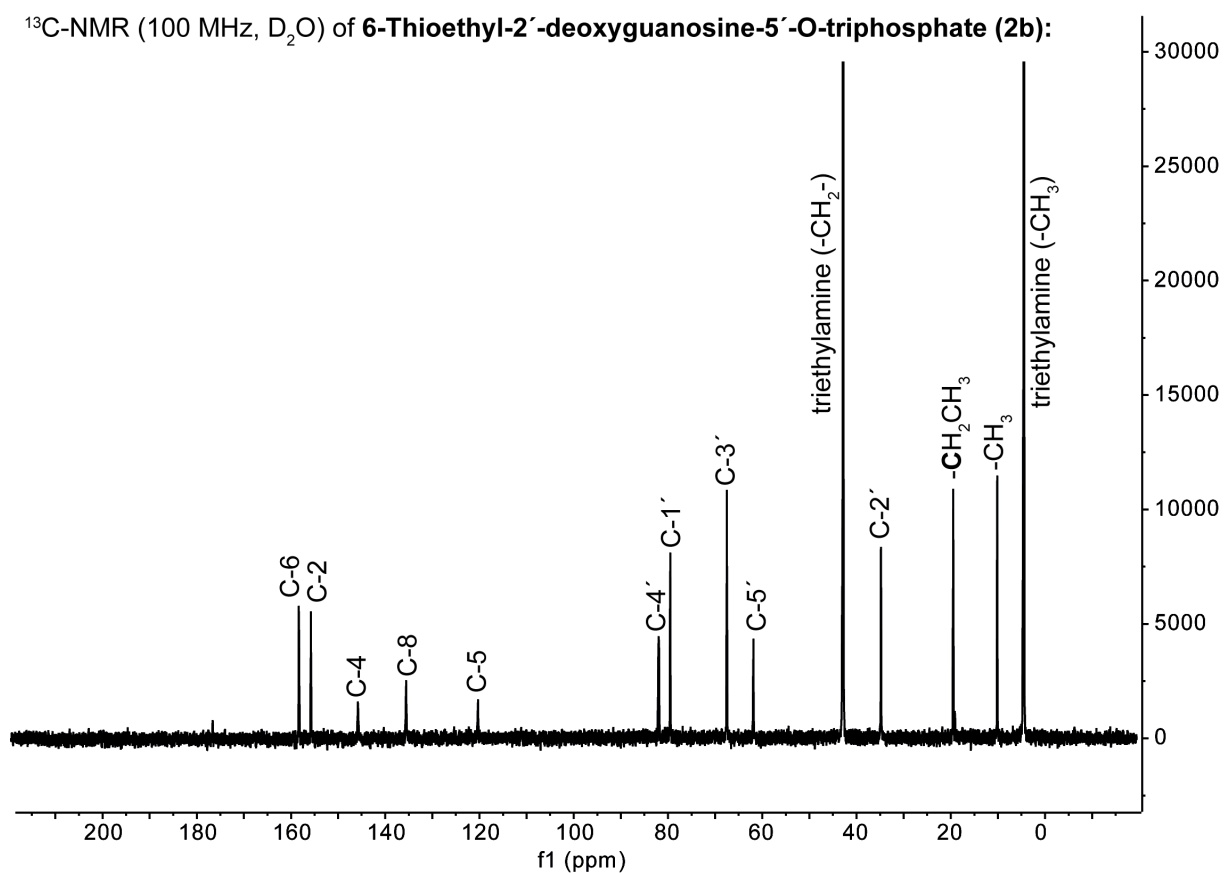

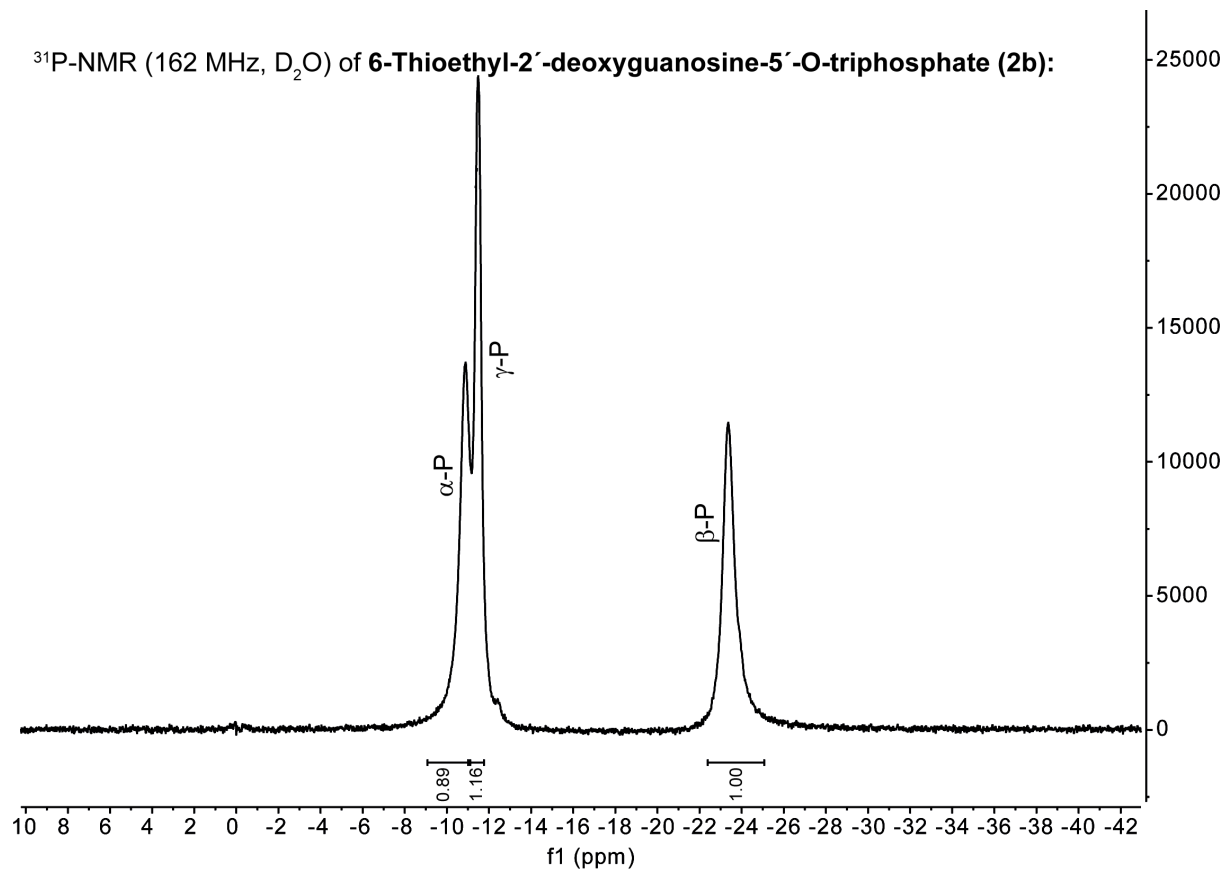

<sup>1</sup>H-NMR (400 MHz, D<sub>2</sub>O) of 2'-Deoxy-6-chloro-guanosine-5'-O-triphosphate (10):

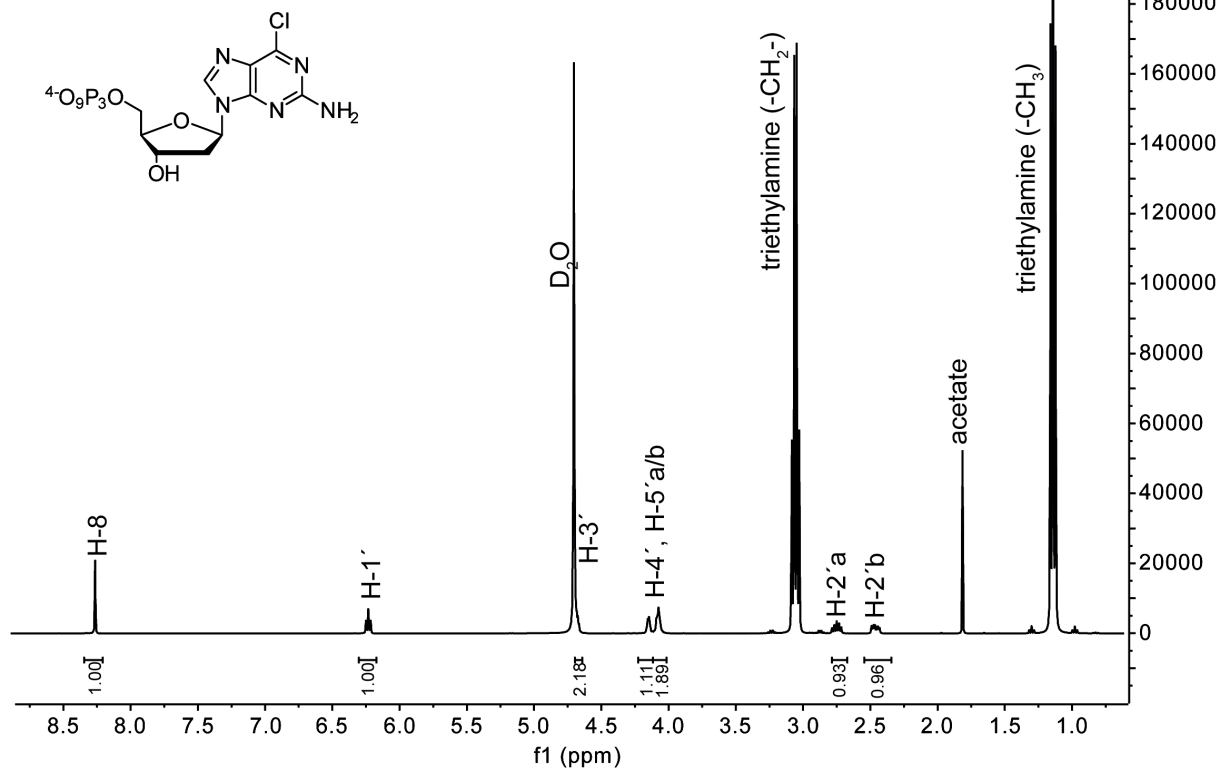

<sup>13</sup>C-NMR (100 MHz, D<sub>2</sub>O) of 2'-Deoxy-6-chloro-guanosine-5'-O-triphosphate (10):

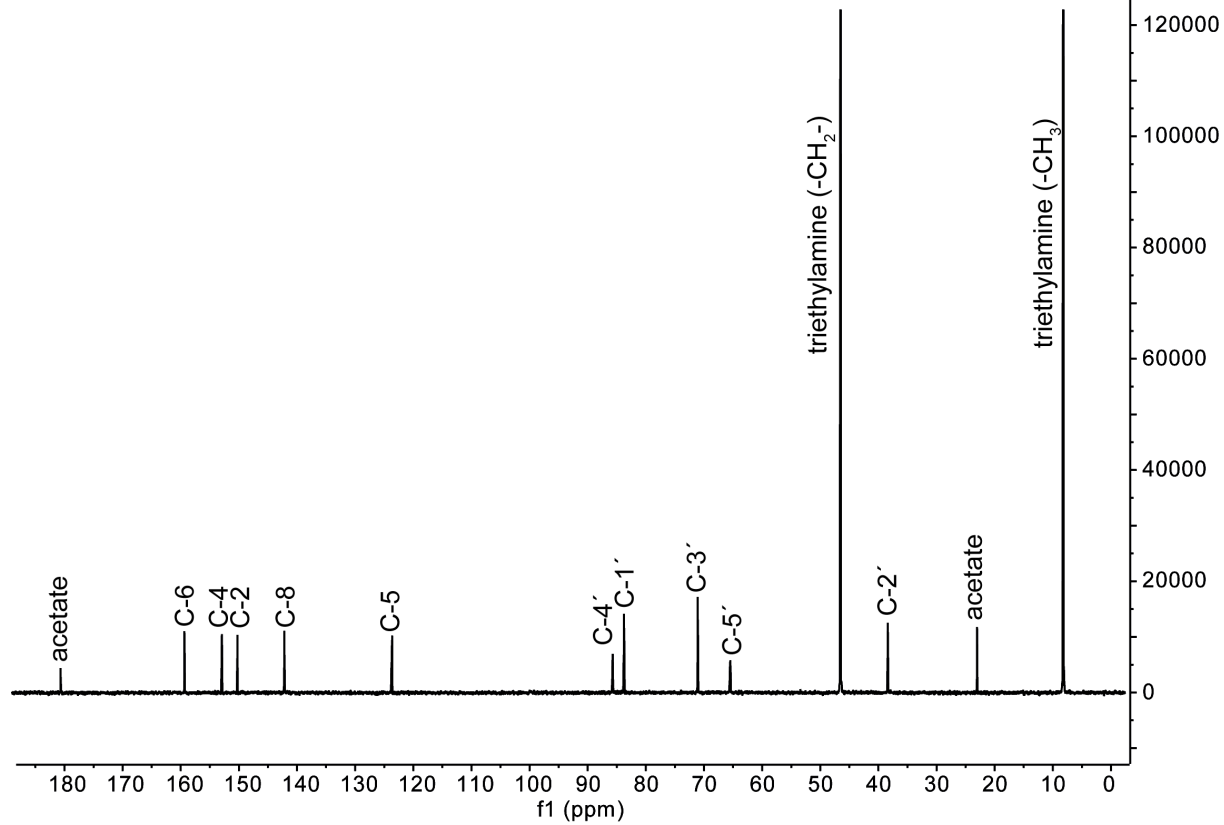

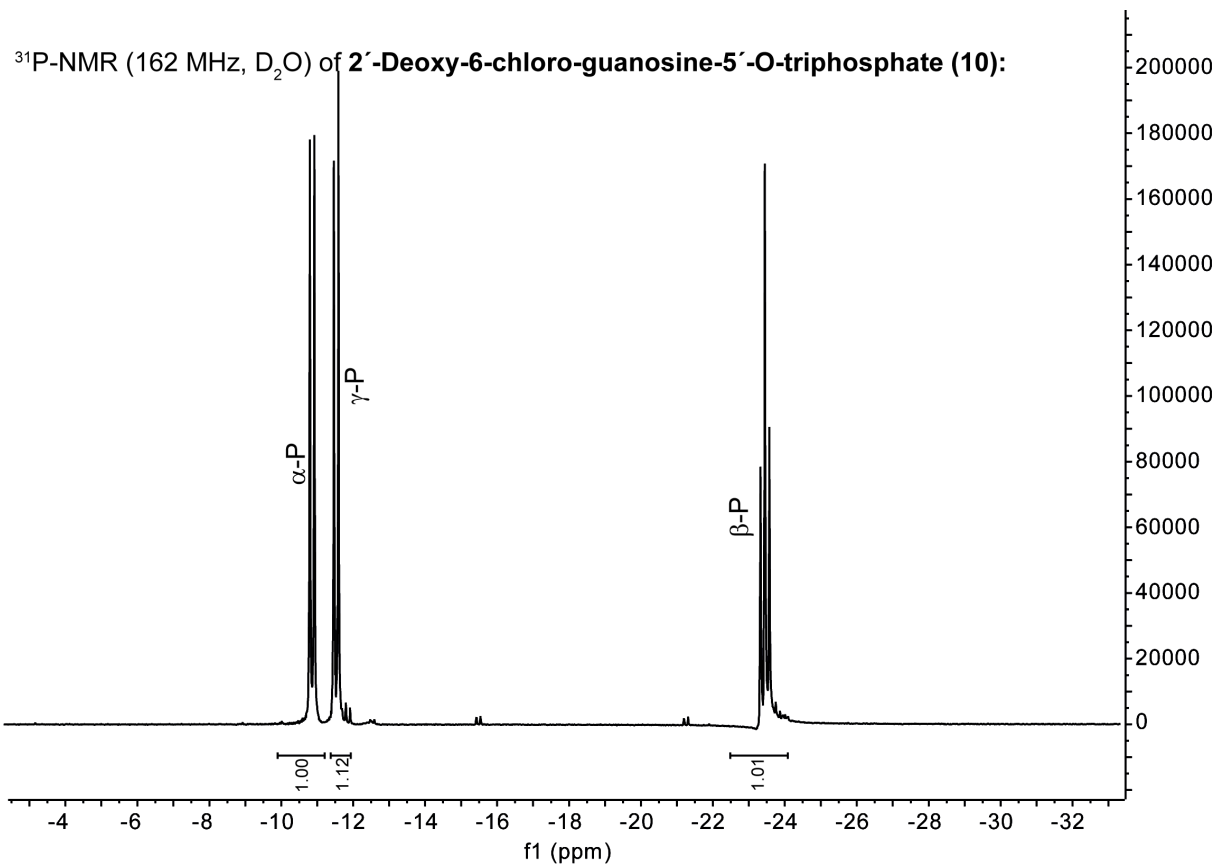

<sup>1</sup>H-NMR (400 MHz, D<sub>2</sub>O) of 6-(Methylamino)-2'-deoxyguanosine-5'-O-triphosphate (3a):

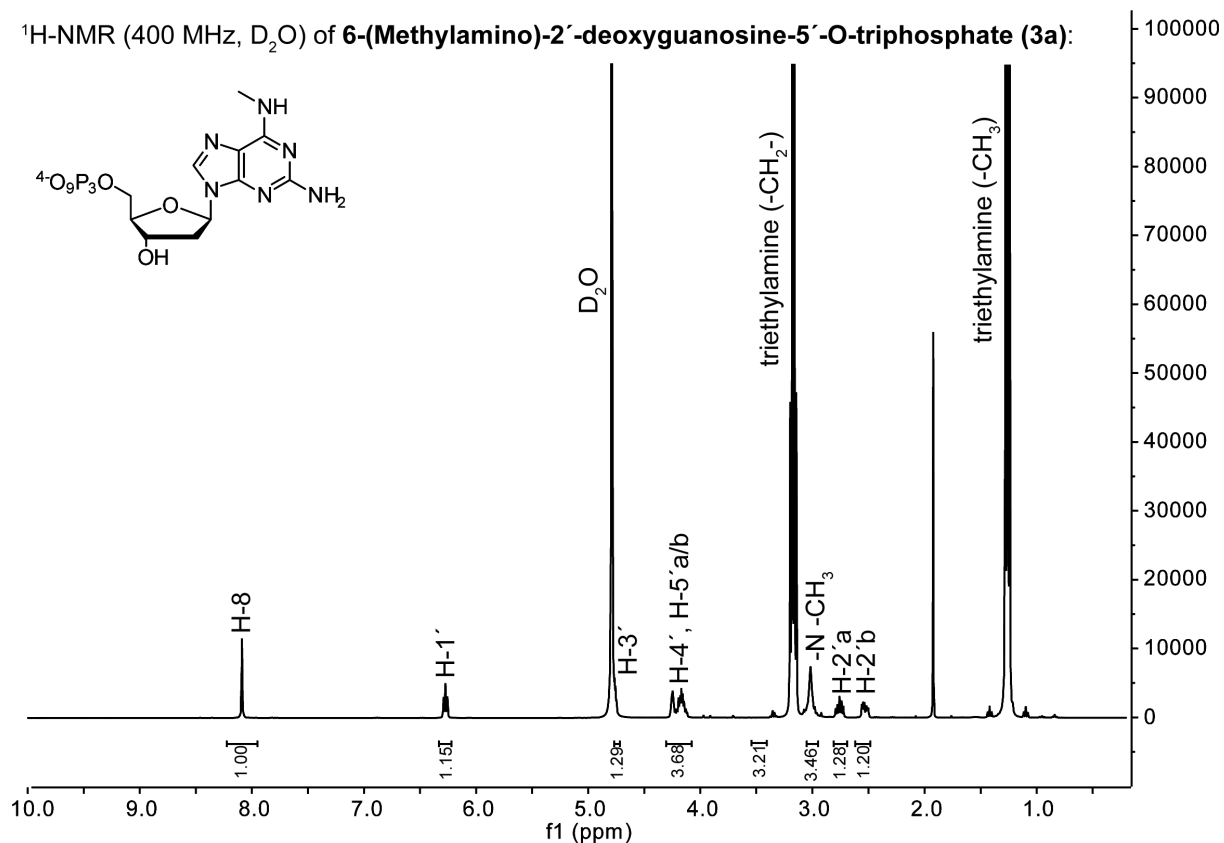

<sup>13</sup>C-NMR (100 MHz, D<sub>2</sub>O) of 6-(Methylamino)-2'-deoxyguanosine-5'-O-triphosphate (3a):

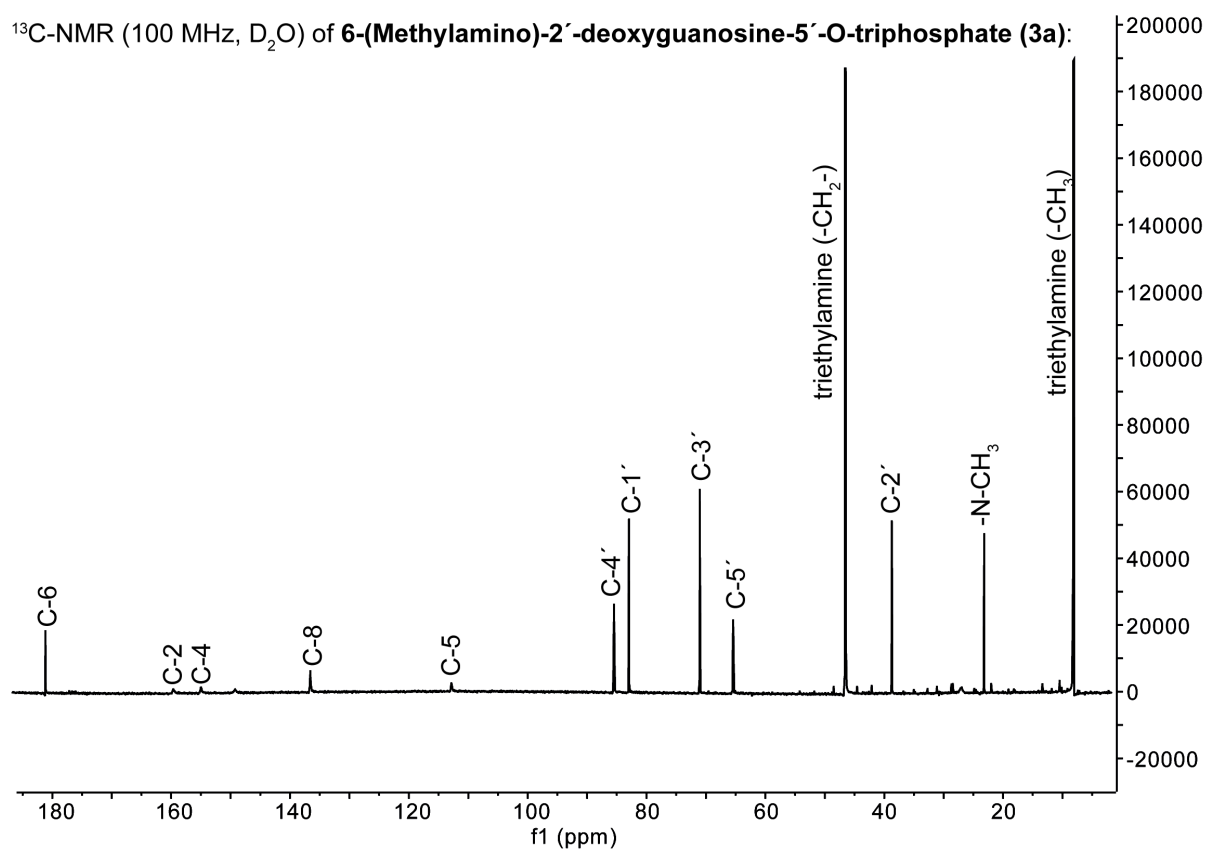

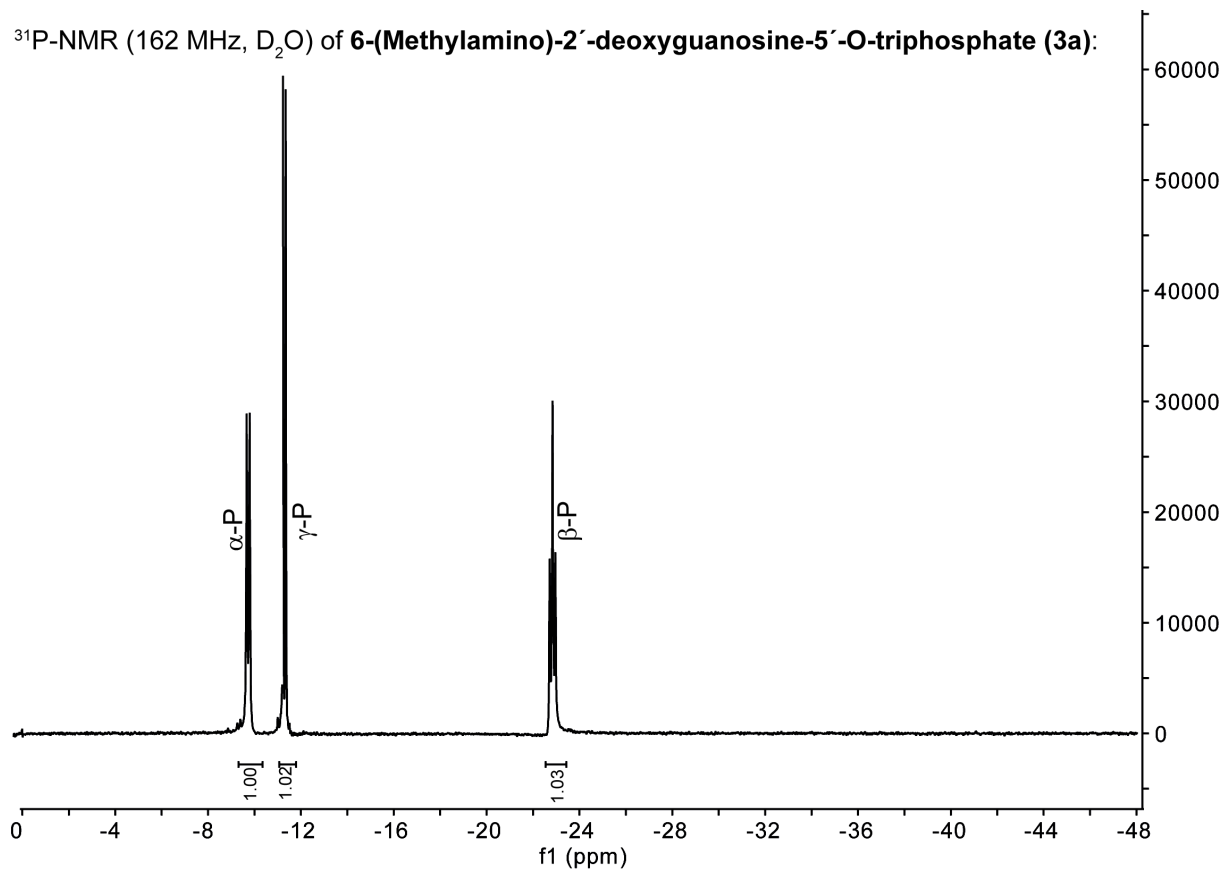

<sup>1</sup>H-NMR (400 MHz, D<sub>2</sub>O) of **6-(Ethylamino)-2'-deoxyguanosine-5'-O-triphosphate (3b)**:

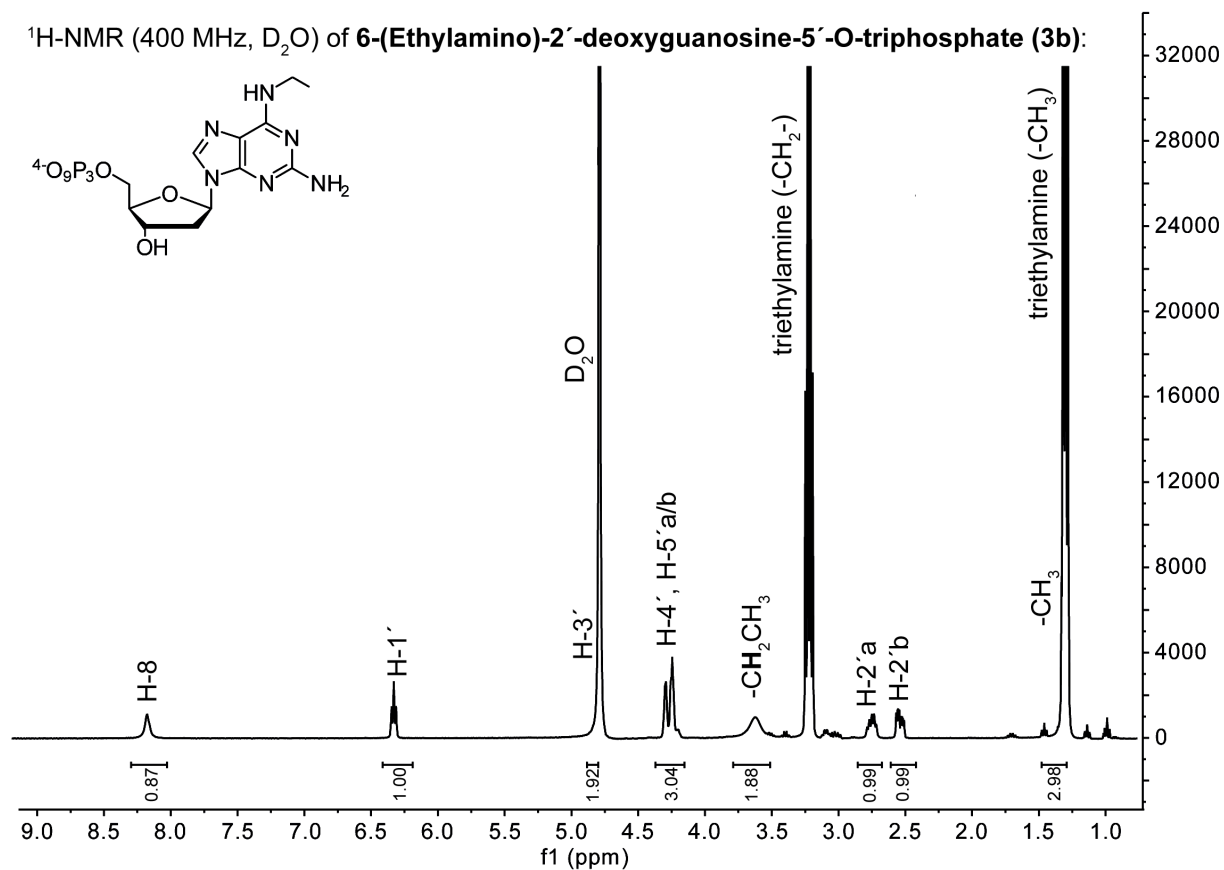

<sup>31</sup>P-NMR (162 MHz, D<sub>2</sub>O) of **6-(Ethylamino)-2'-deoxyguanosine-5'-O-triphosphate (3b)**:

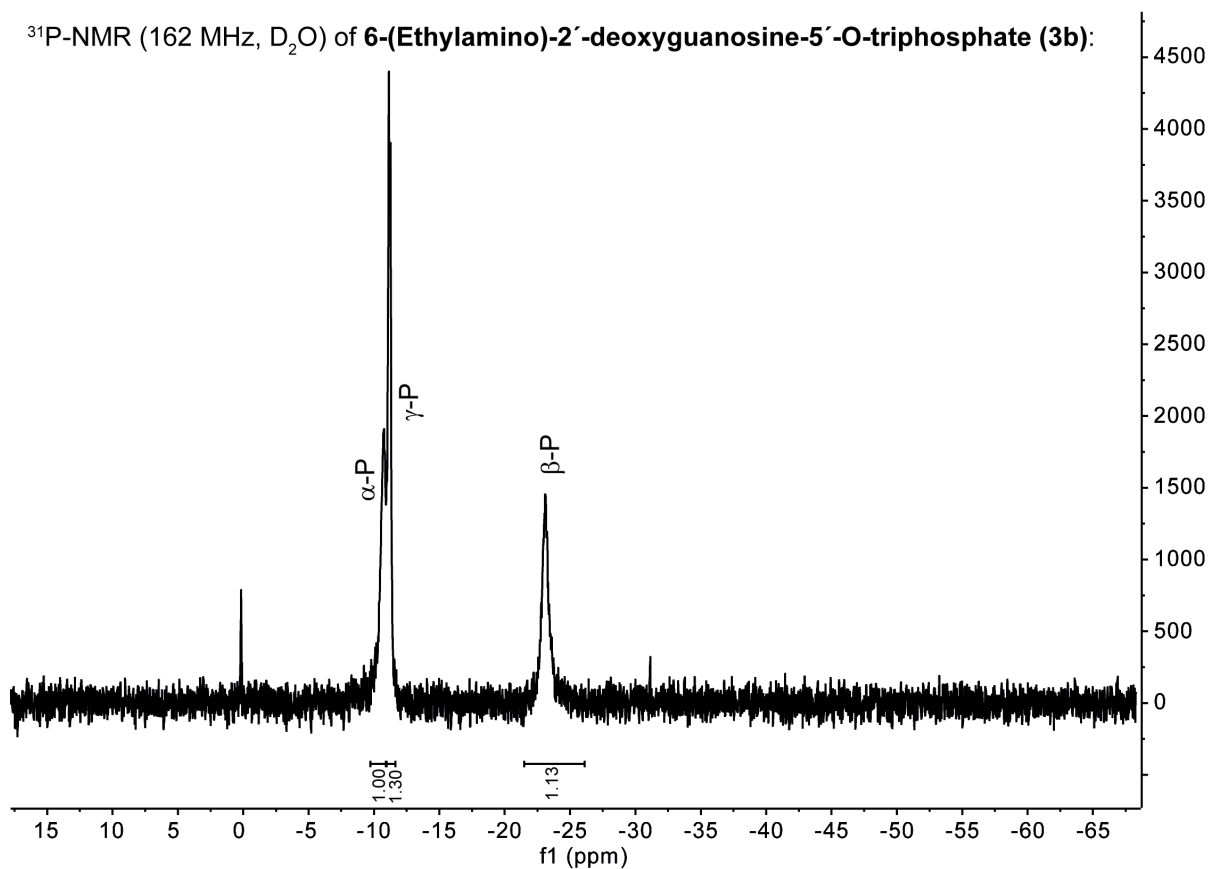

<sup>1</sup>H-NMR (400 MHz, D<sub>2</sub>O) of **6-(Propylamino)-2'-deoxyguanosine-5'-O-triphosphate (3c)**:

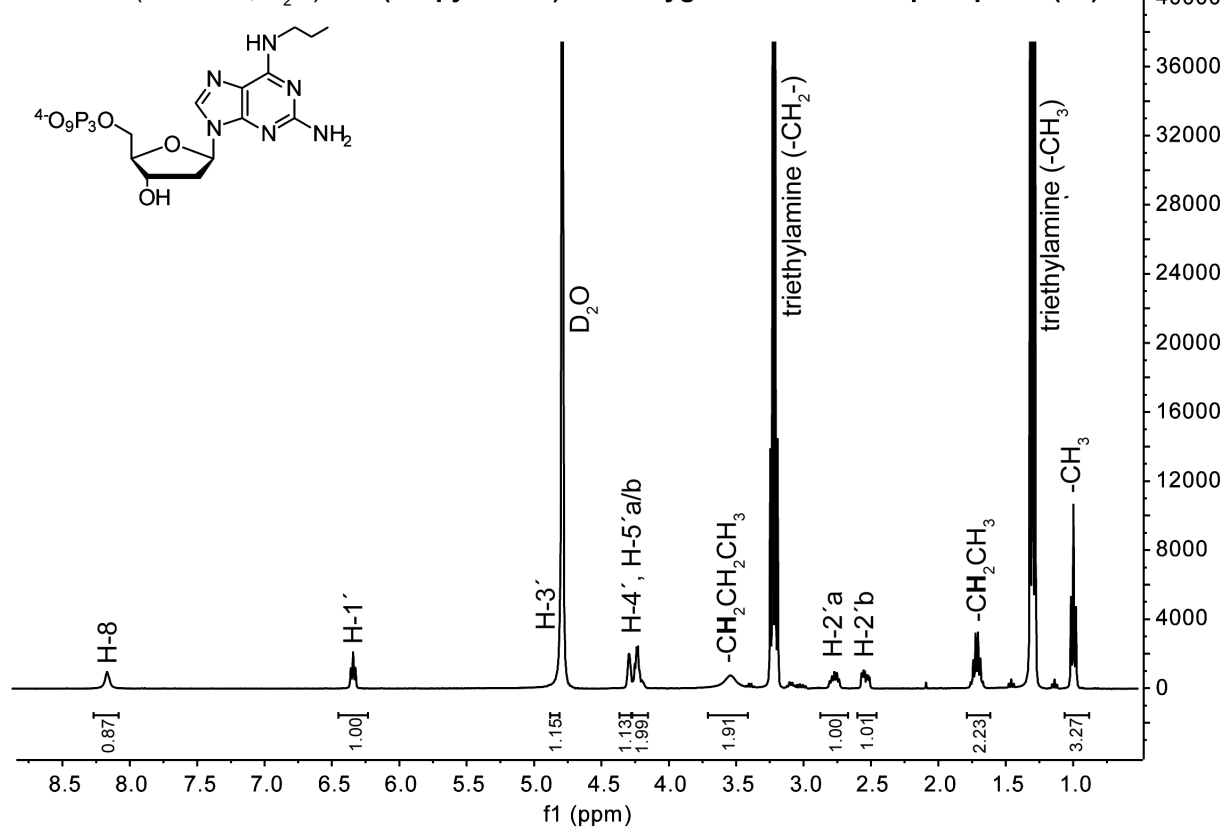

<sup>31</sup>P-NMR (162 MHz, D<sub>2</sub>O) of **6-(Propylamino)-2'-deoxyguanosine-5'-O-triphosphate (3c)**:

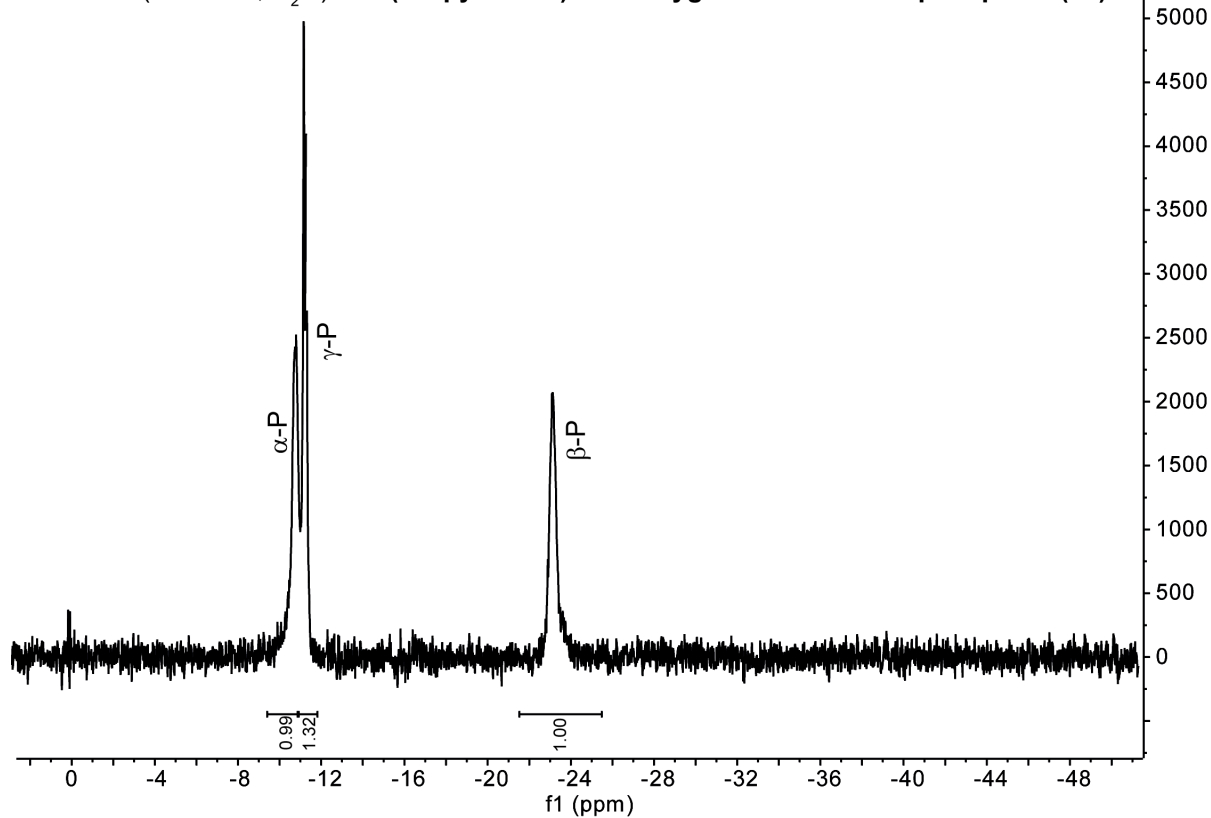

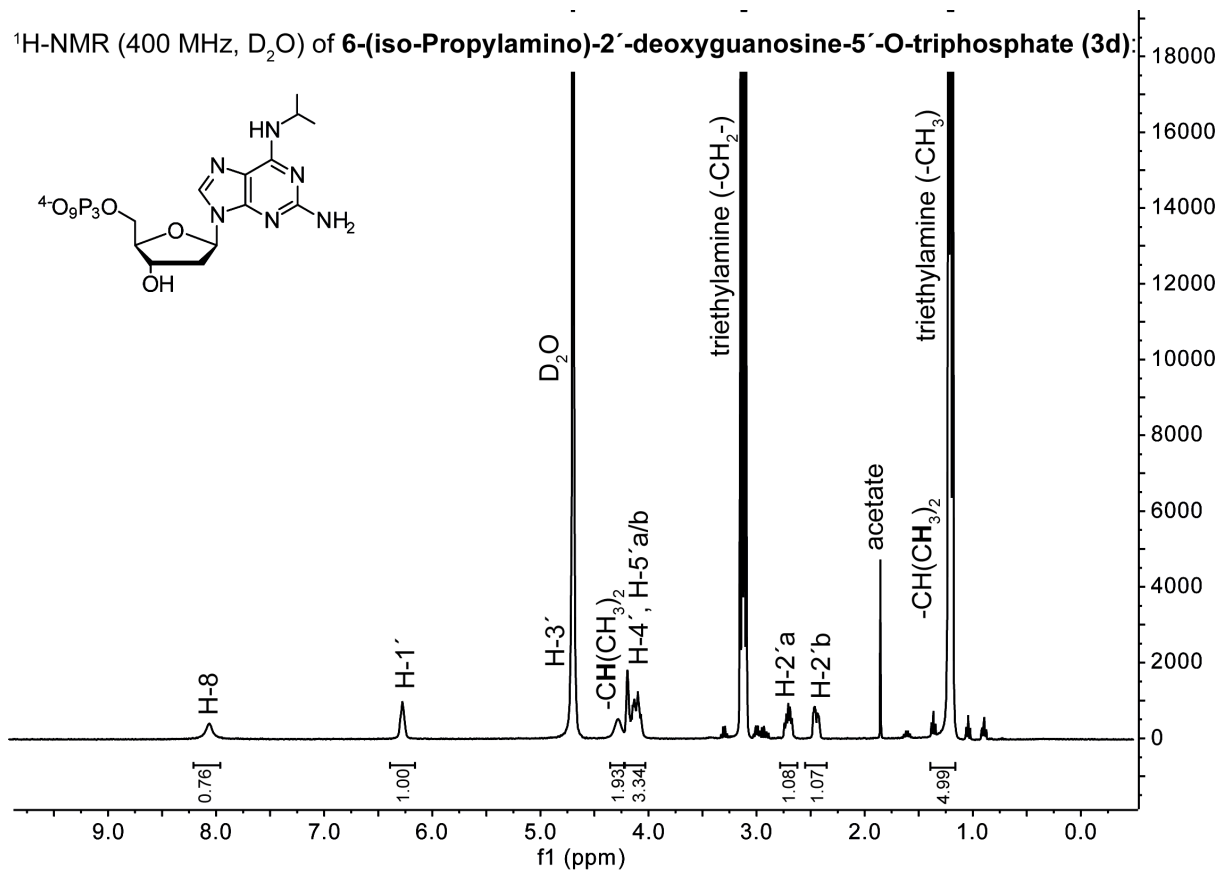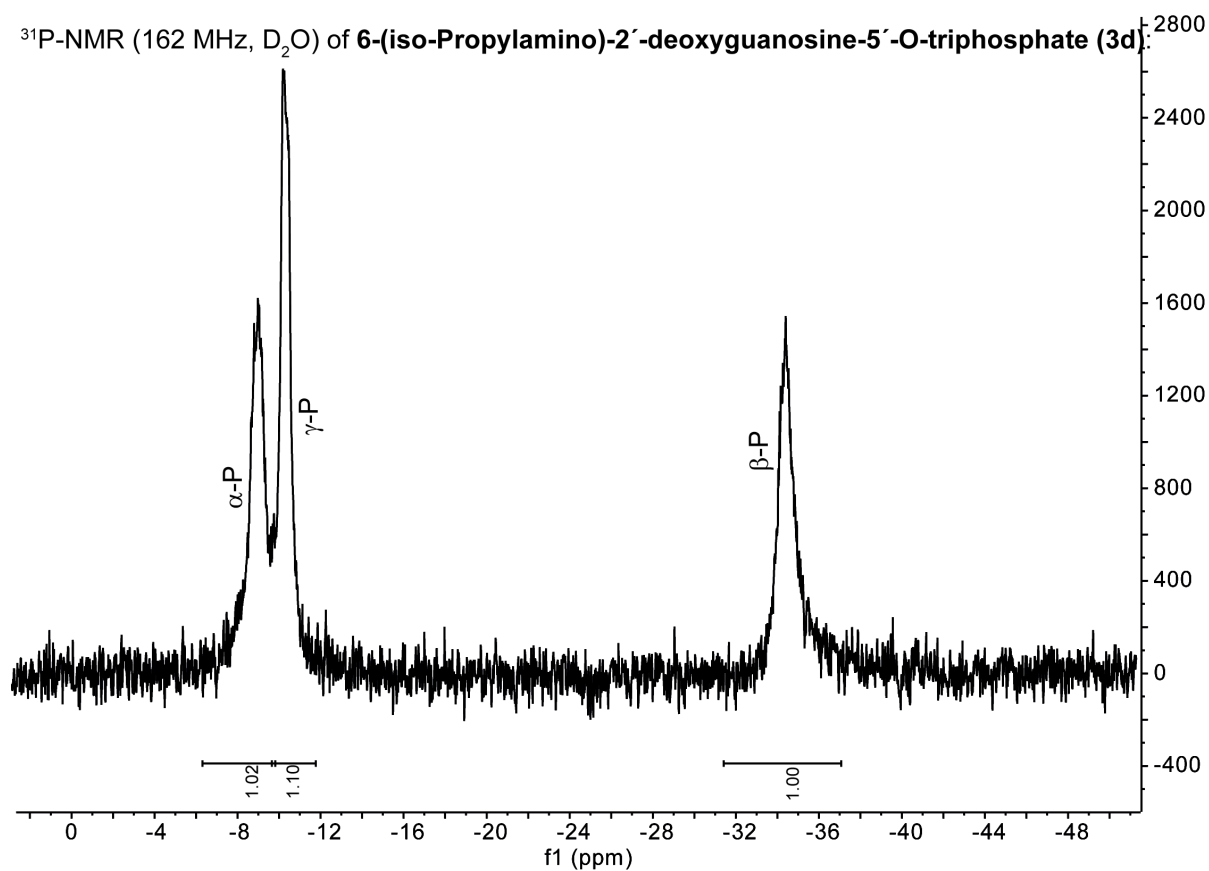

<sup>1</sup>H-NMR (400 MHz, D<sub>2</sub>O) of **6-(Cyclohexylamino)-2'-deoxyguanosine-5'-O-triphosphate (3e)**:

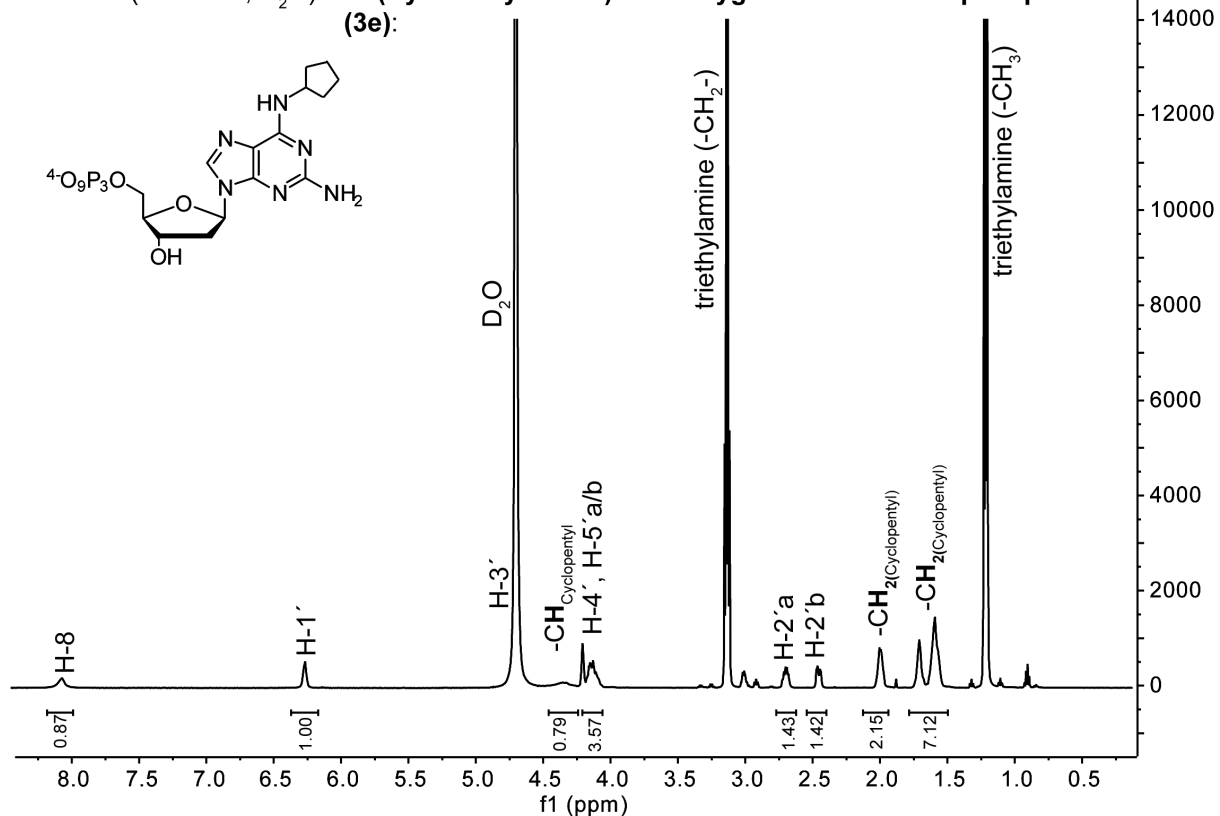

<sup>31</sup>P-NMR (162 MHz, D<sub>2</sub>O) of 6-(Cyclohexylamino)-2'-deoxyguanosine-5'-O-triphosphate (3e):

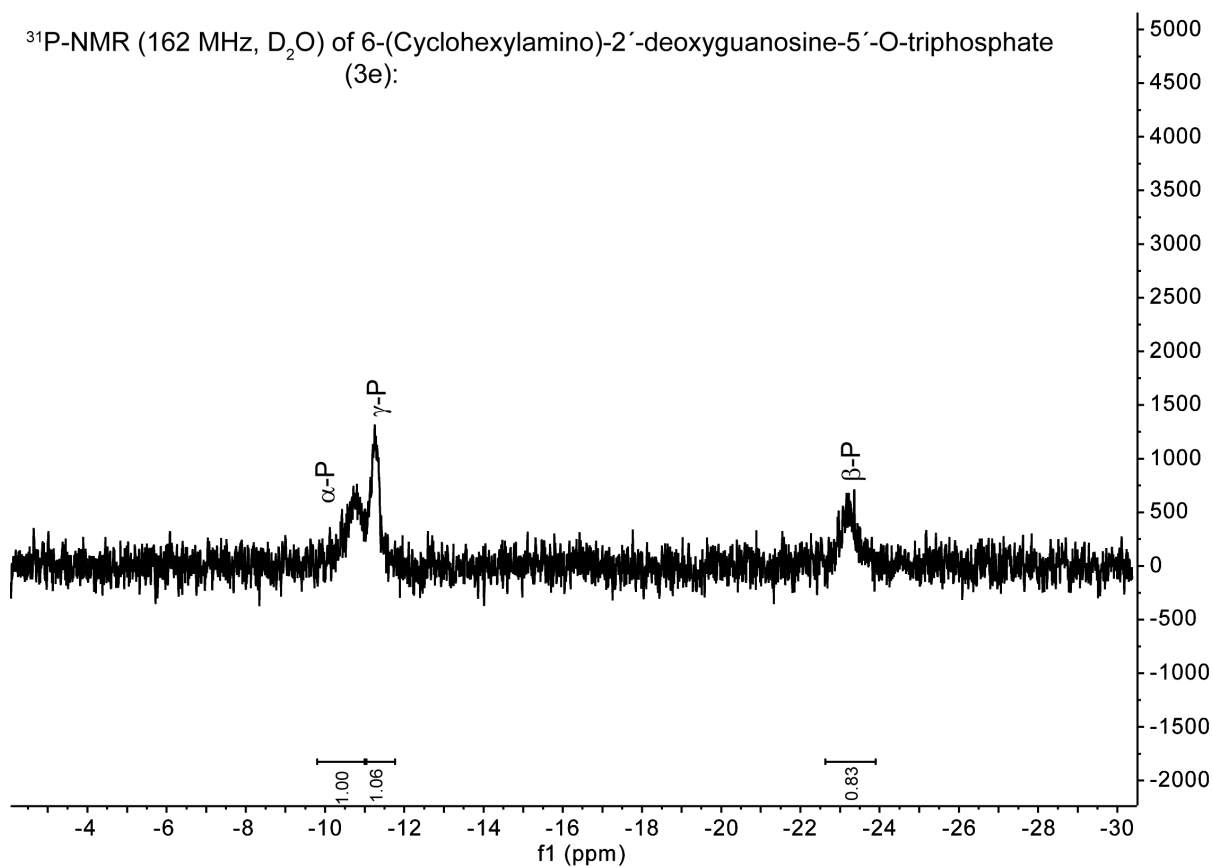

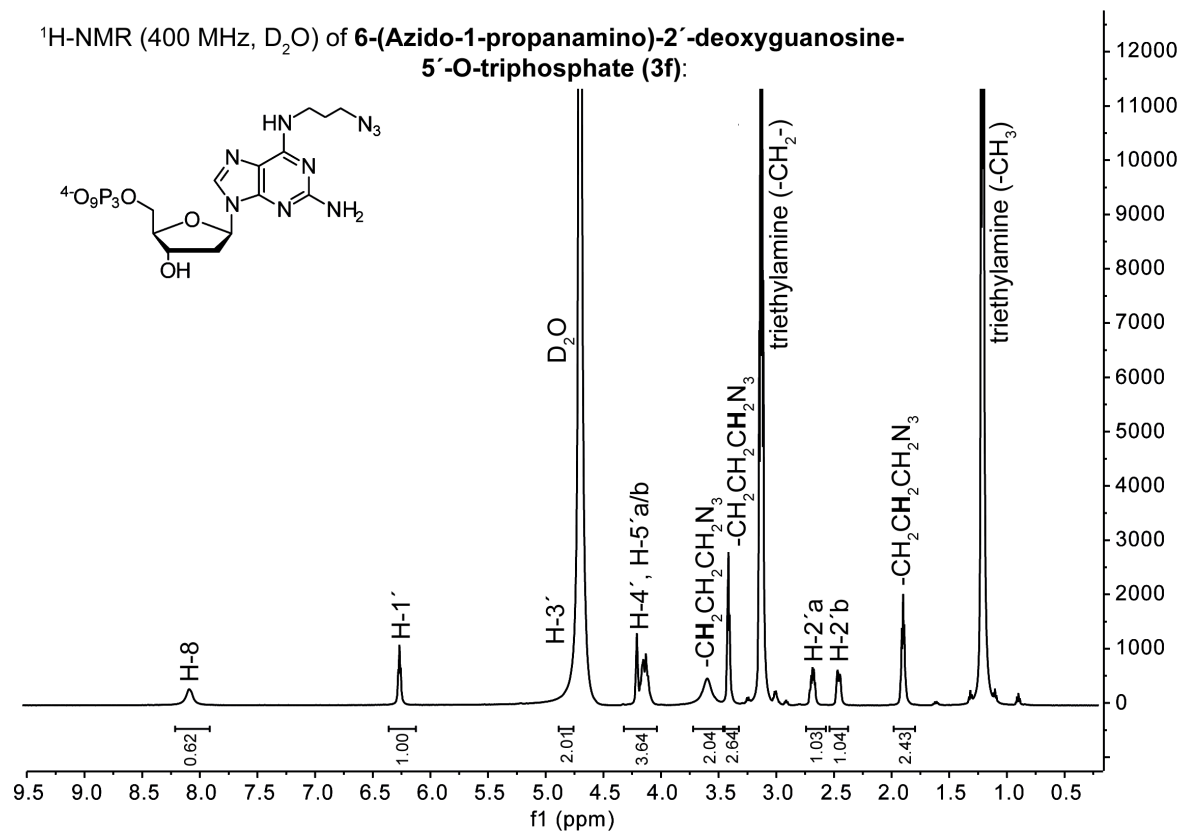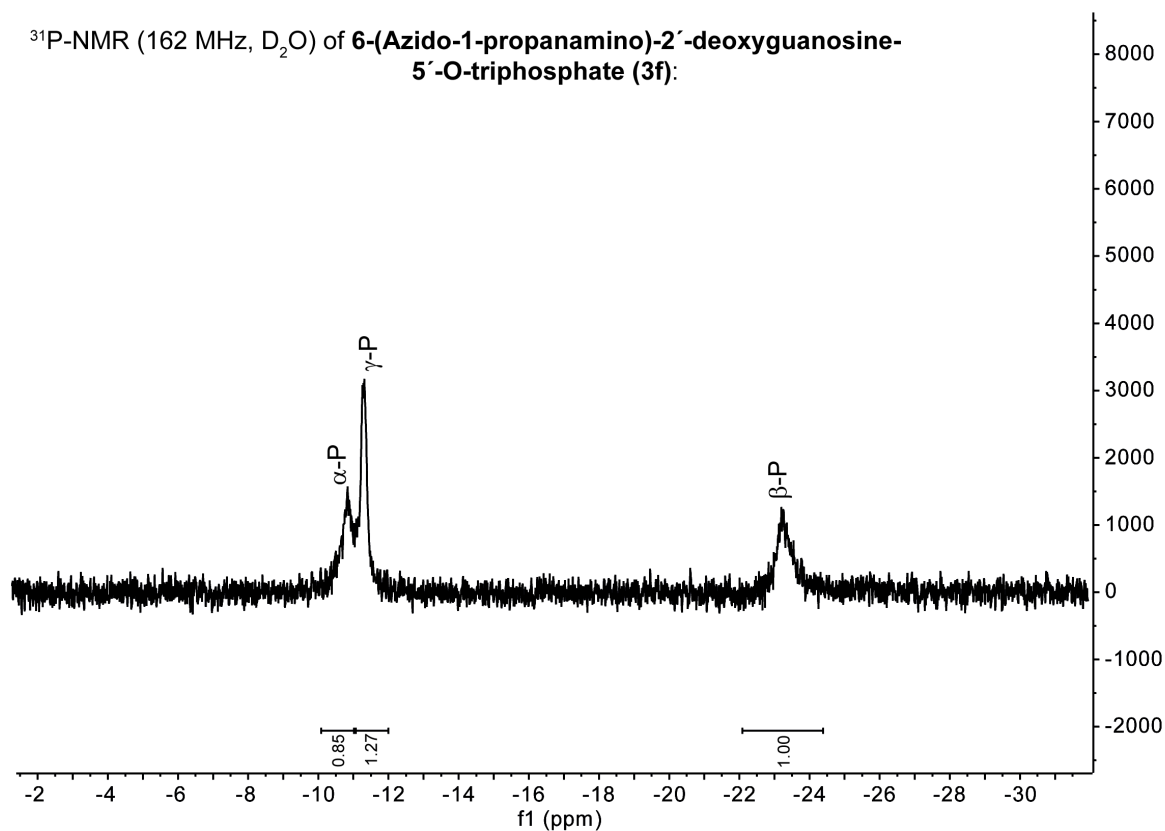

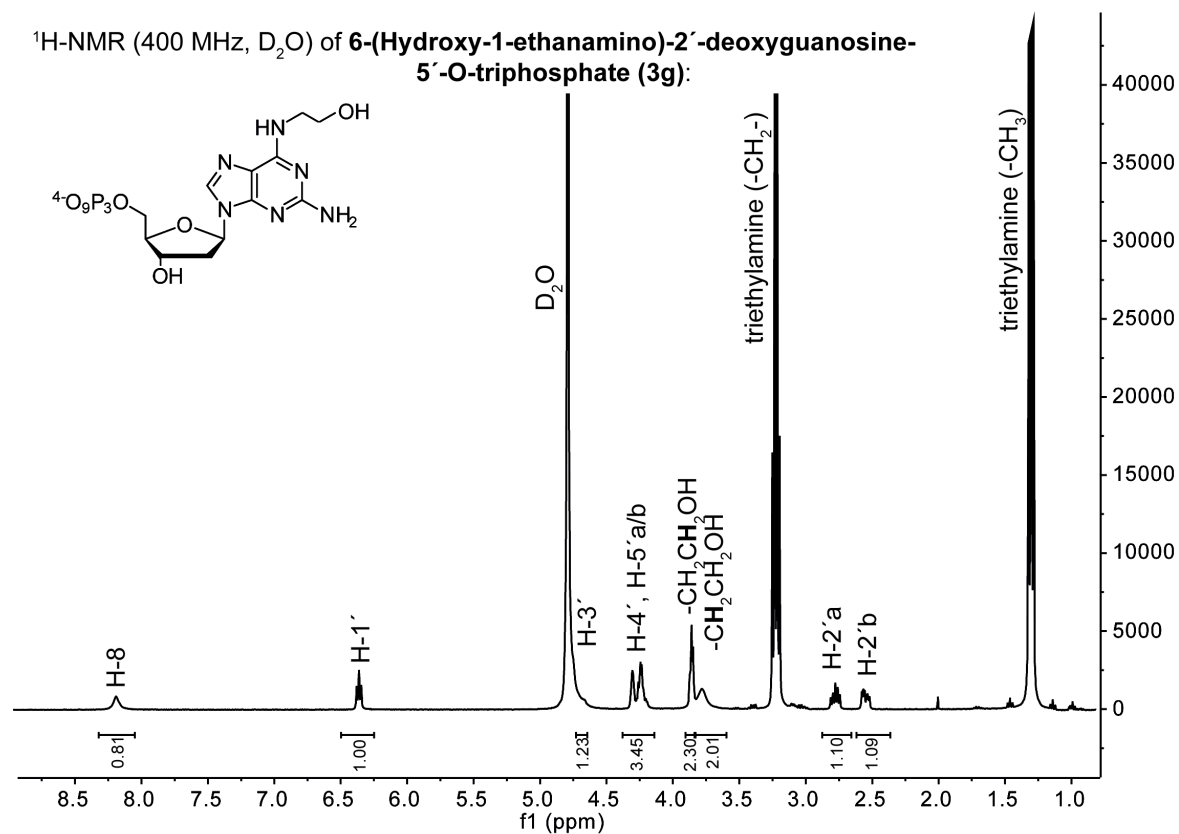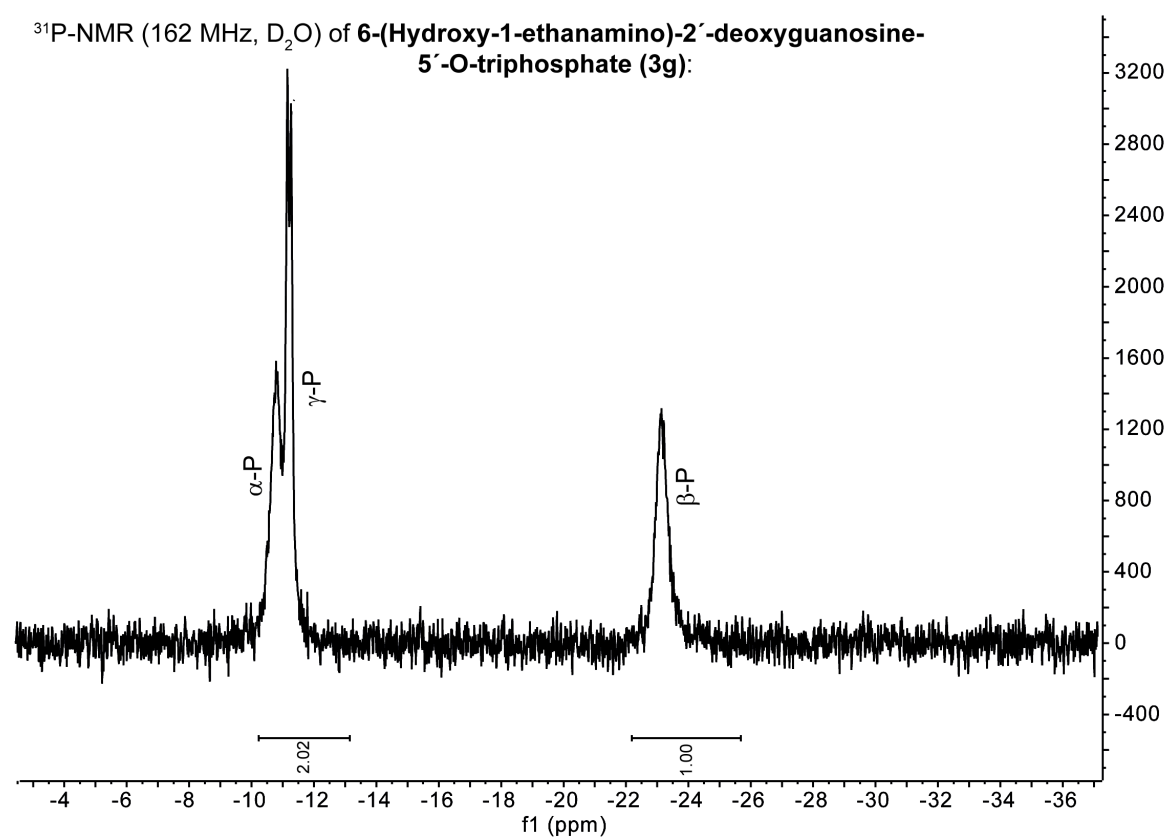

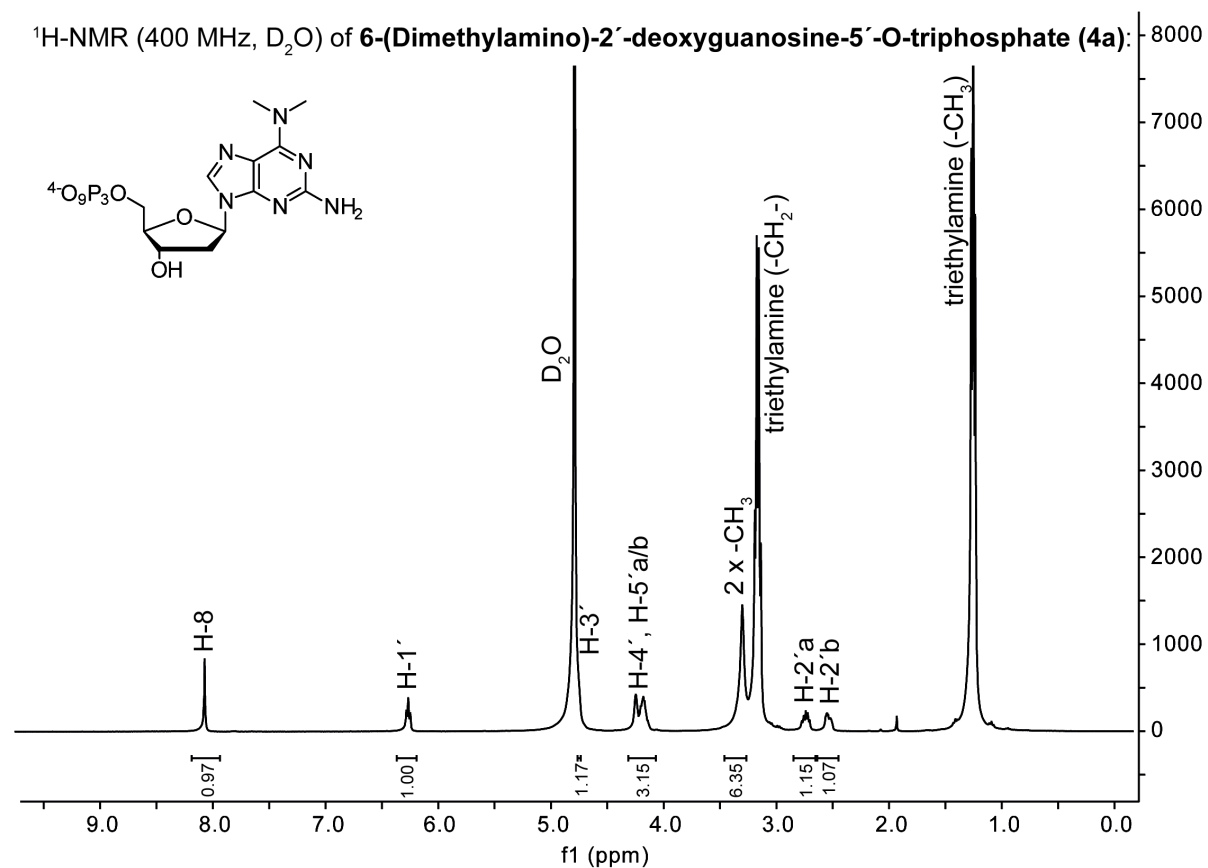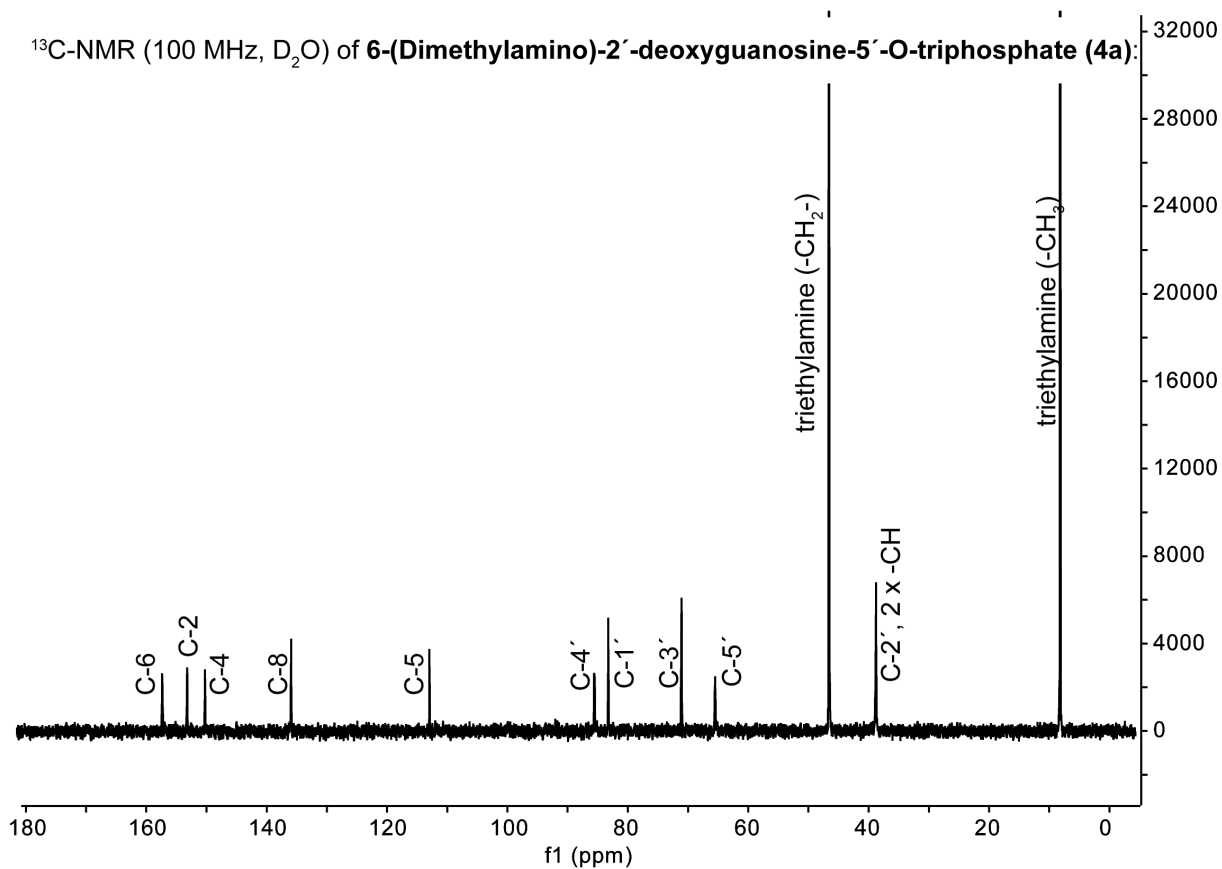

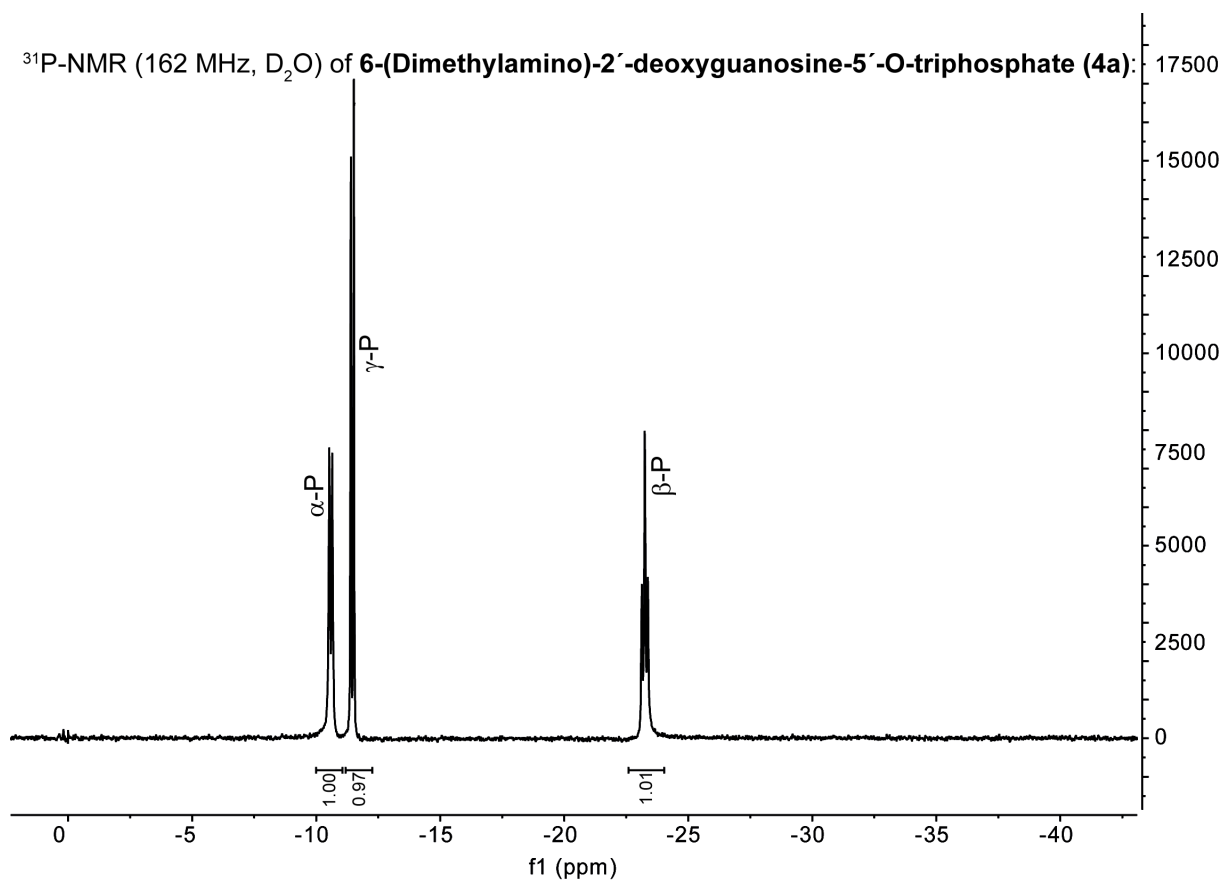

<sup>1</sup>H-NMR (400 MHz, D<sub>2</sub>O) of 6-(Methylethylamino)-2'-deoxyguanosine-5'-O-triphosphate (**4b**):

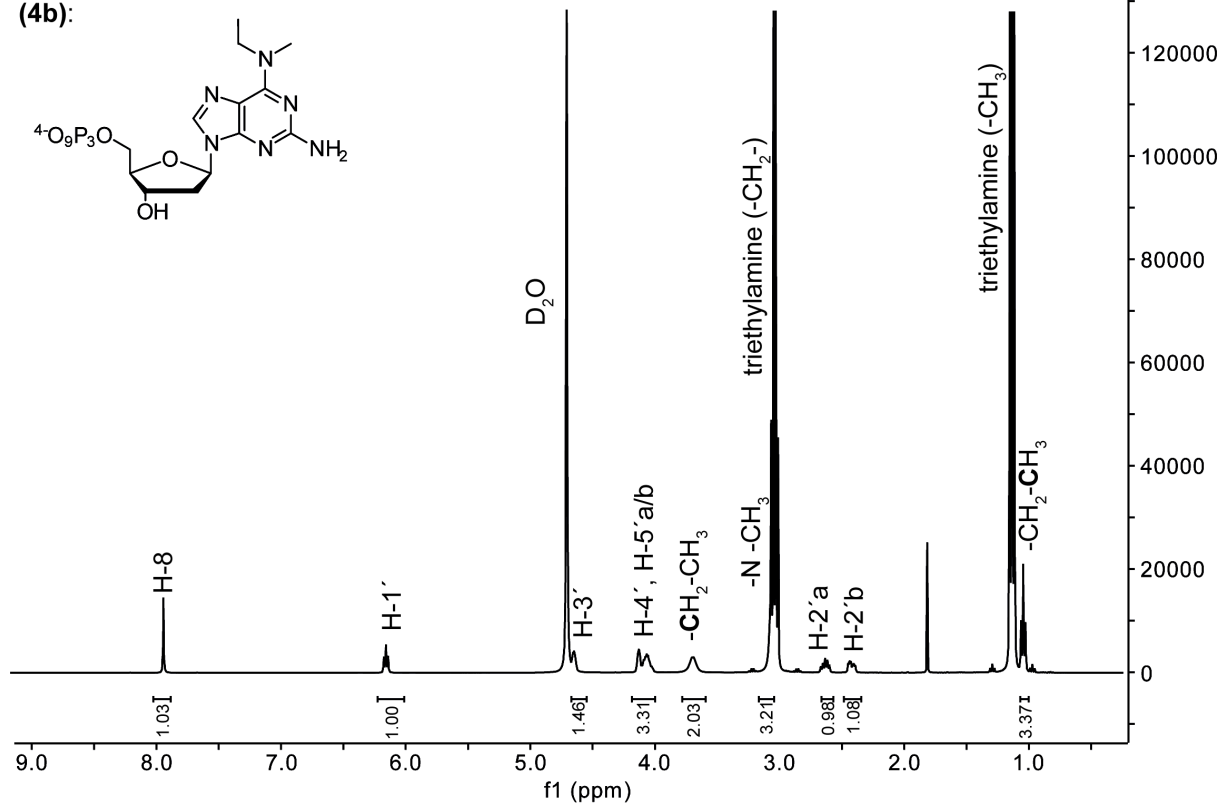

<sup>13</sup>C-NMR (100 MHz, D<sub>2</sub>O) of 6-(Methylethylamino)-2'-deoxyguanosine-5'-O-triphosphate (**4b**):

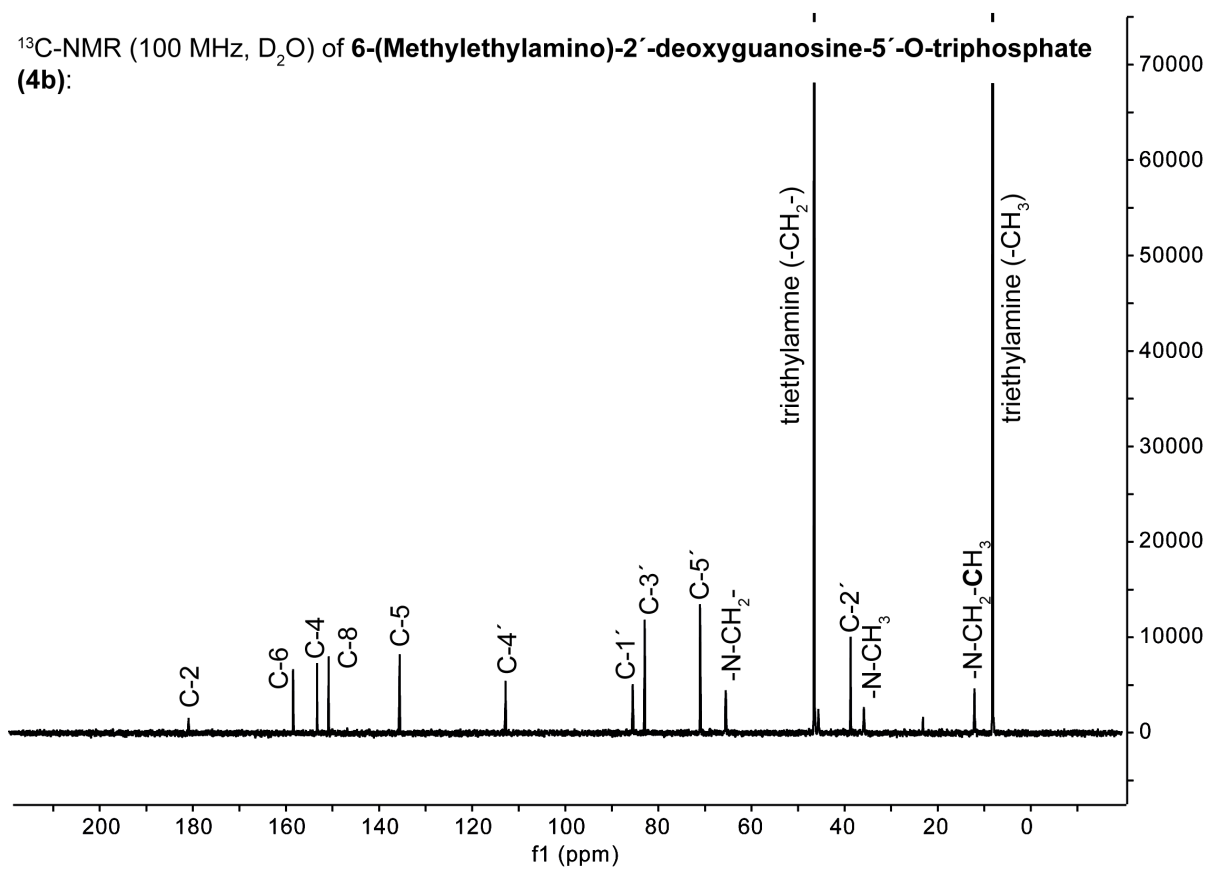

<sup>31</sup>P-NMR (162 MHz, D<sub>2</sub>O) of **6-(Methylethylamino)-2'-deoxyguanosine-5'-O-triphosphate (4b)**:

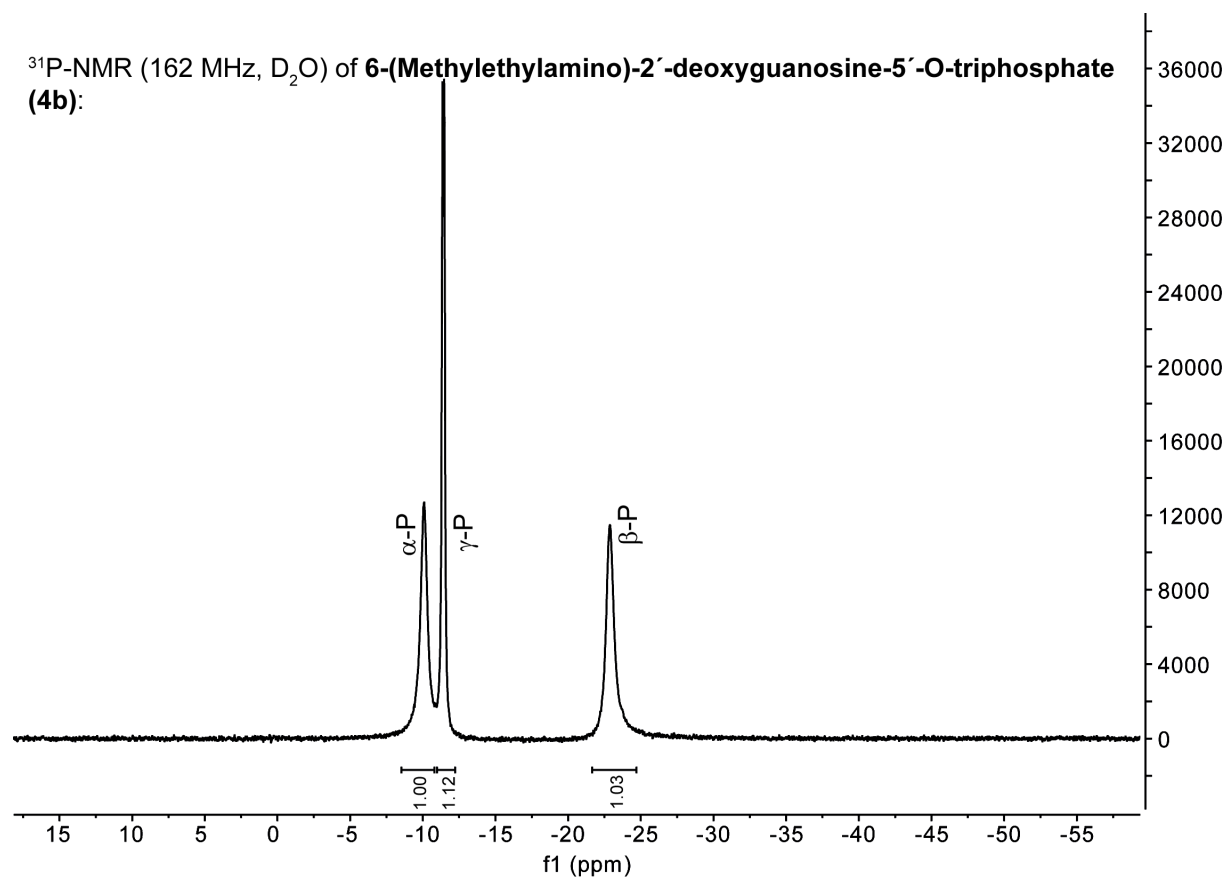

<sup>1</sup>H-NMR (400 MHz, D<sub>2</sub>O) of **6-Methylpropylamino-2'-deoxyguanosine-5'-O-triphosphate (4c)**:

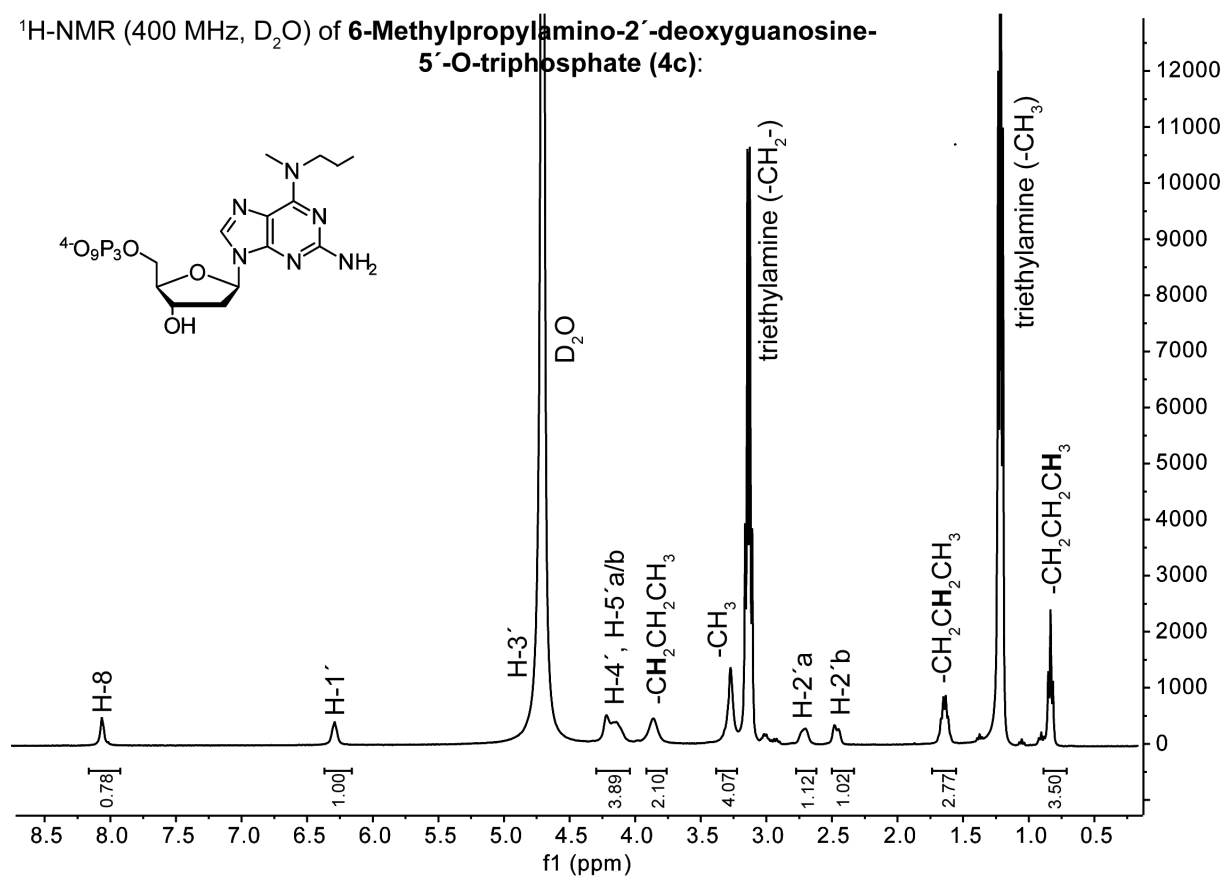

<sup>31</sup>P-NMR (162 MHz, D<sub>2</sub>O) of **6-Methylpropylamino-2'-deoxyguanosine-5'-O-triphosphate (4c)**:

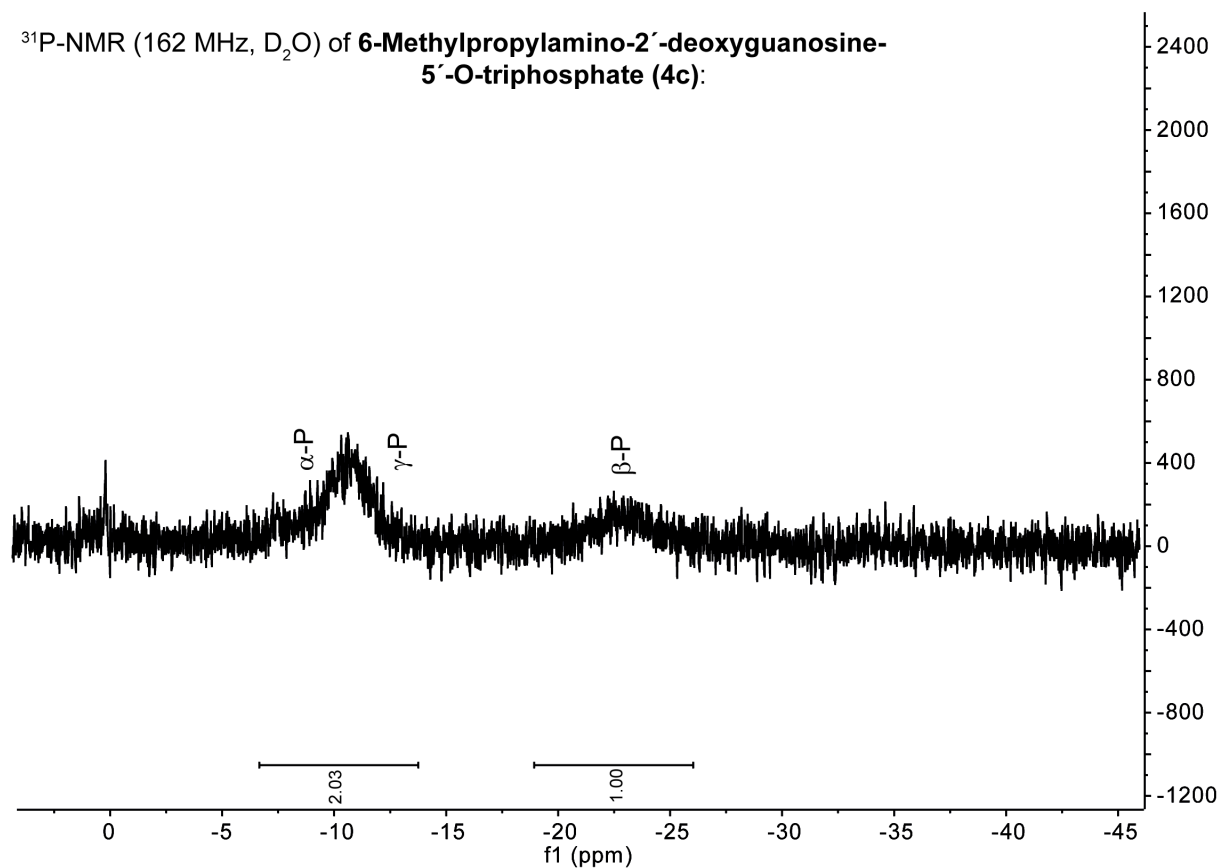

<sup>1</sup>H-NMR (400 MHz, D<sub>2</sub>O) of **6-Methyl-iso-propylamino-2'-deoxyguanosine-5'-O-triphosphate (4d)**:

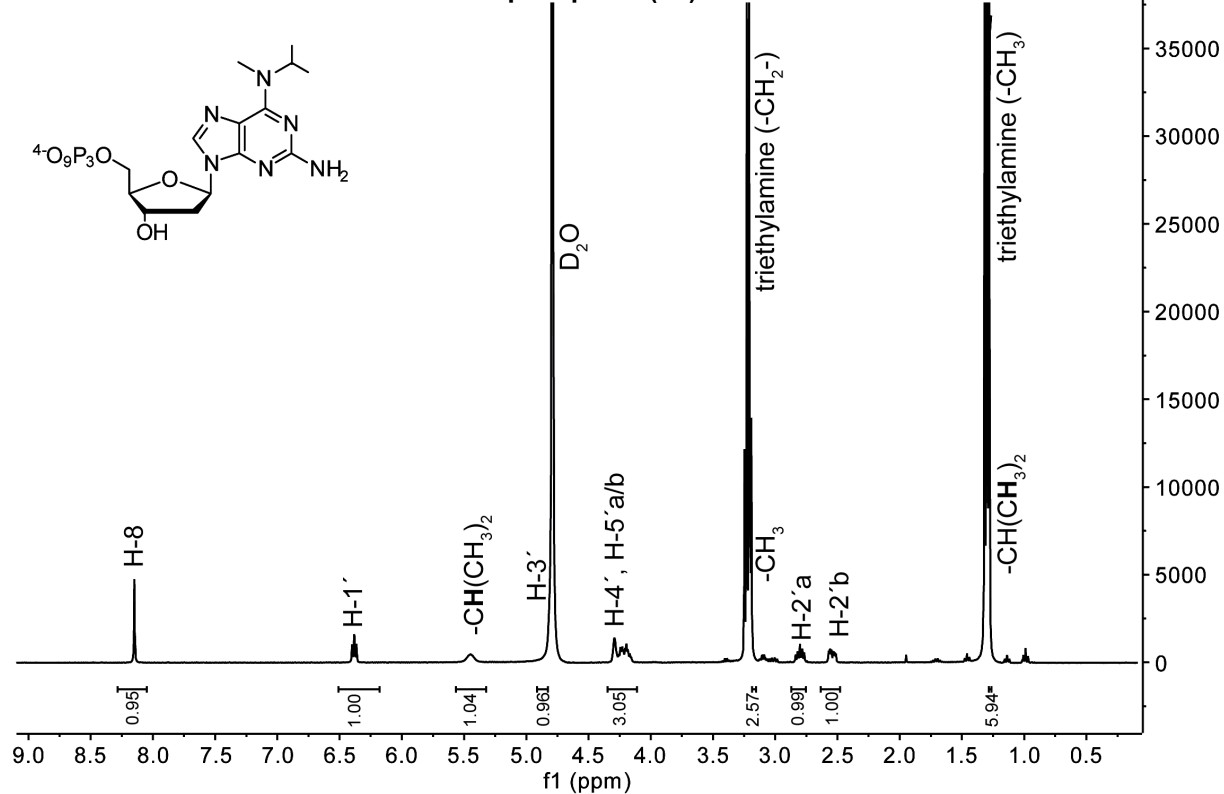

<sup>31</sup>P-NMR (162 MHz, D<sub>2</sub>O) of **6-Methyl-iso-propylamino-2'-deoxyguanosine-5'-O-triphosphate (4d)**:

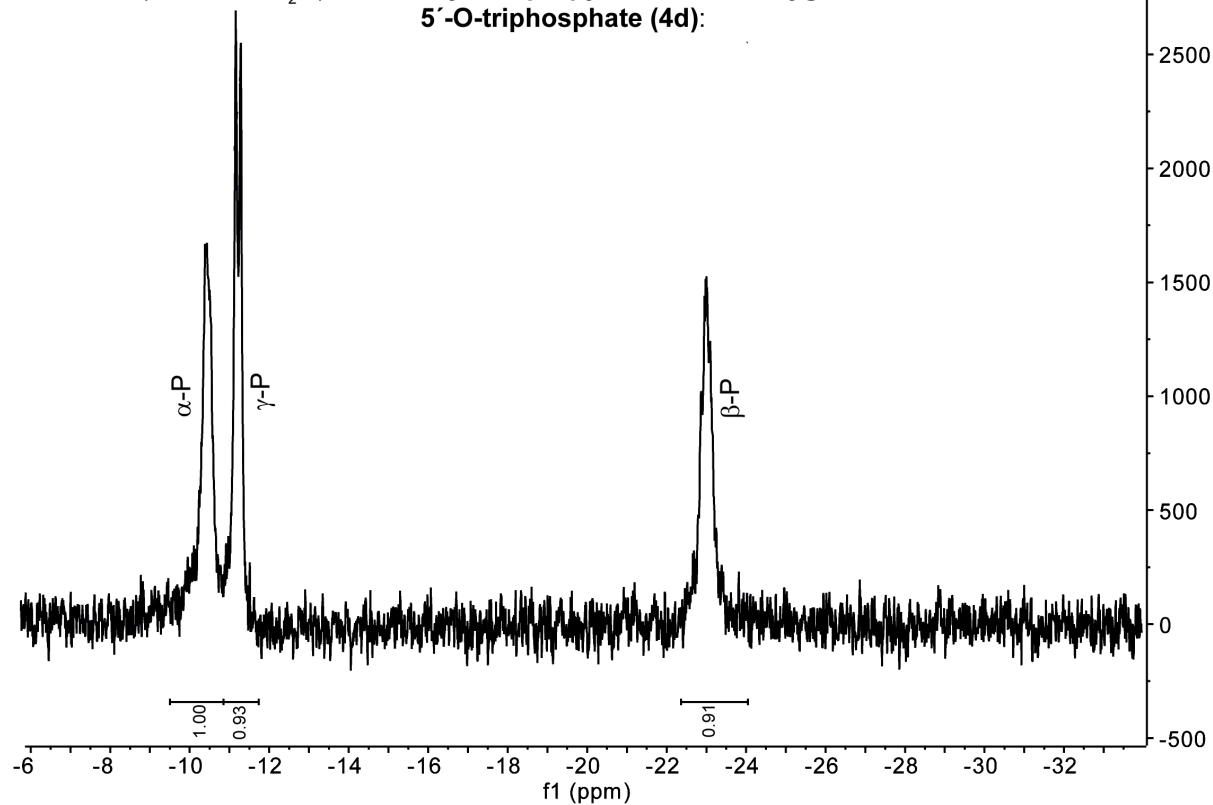

<sup>1</sup>H-NMR (400 MHz, D<sub>2</sub>O) of 6-(Diethylamino)-2'-deoxyguanosine-5'-O-triphosphate (4e):

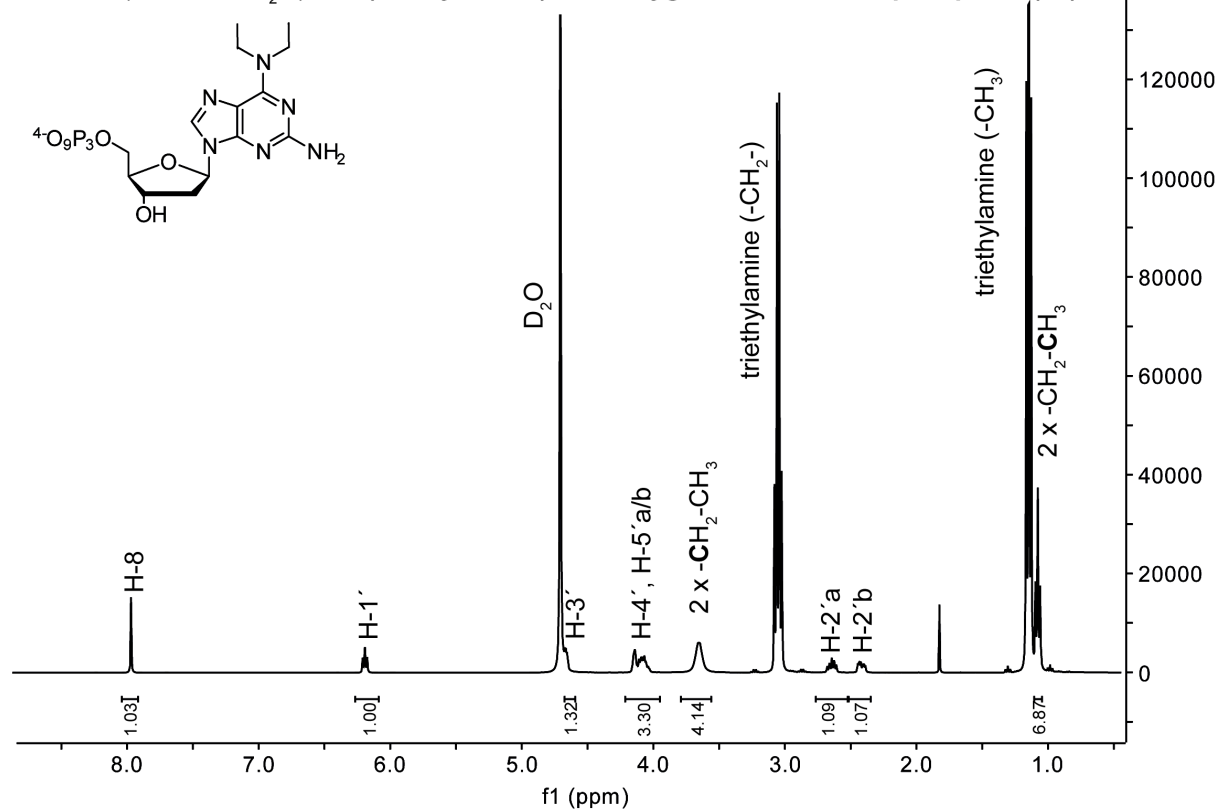

<sup>13</sup>C-NMR (100 MHz, D<sub>2</sub>O) of 6-(Diethylamino)-2'-deoxyguanosine-5'-O-triphosphate (4e):

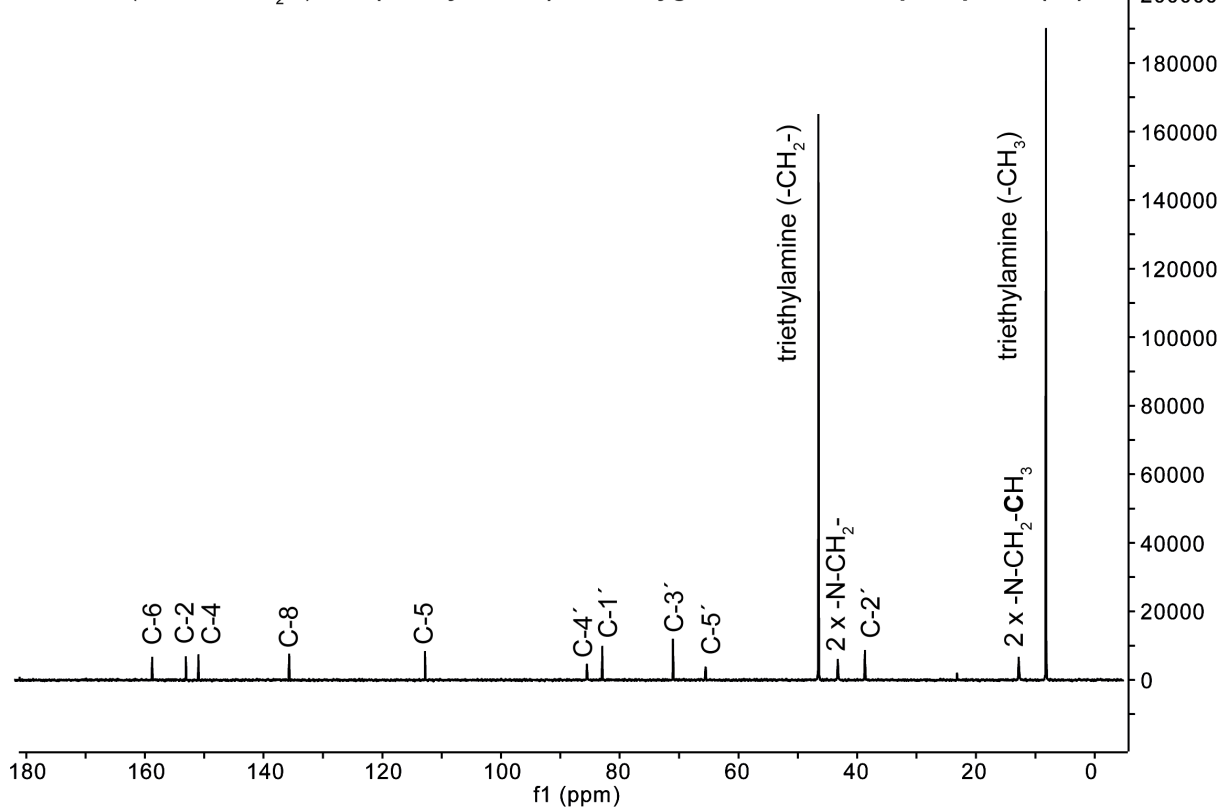

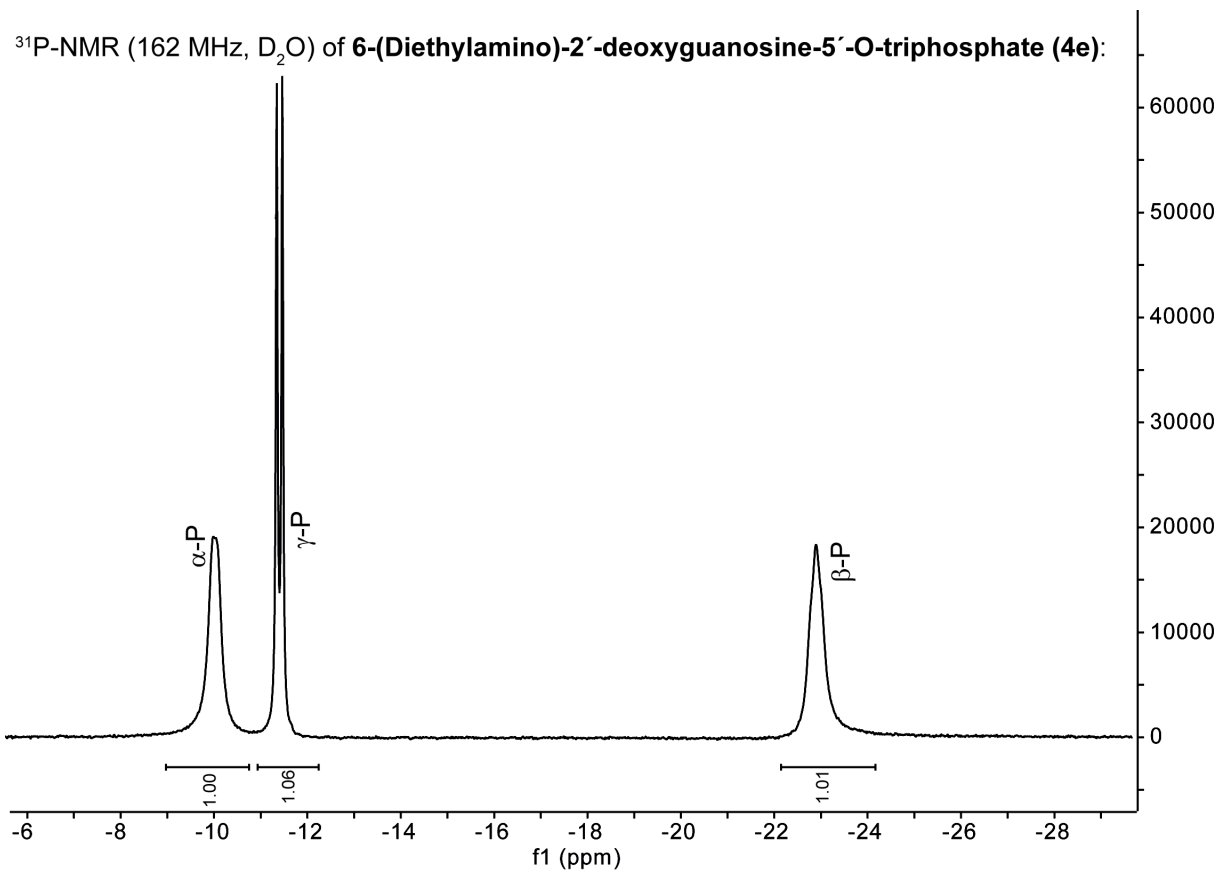

<sup>1</sup>H-NMR (400 MHz, D<sub>2</sub>O) of 6-Ethylpropylamino-2'-deoxyguanosine-5'-O-triphosphate (4f):

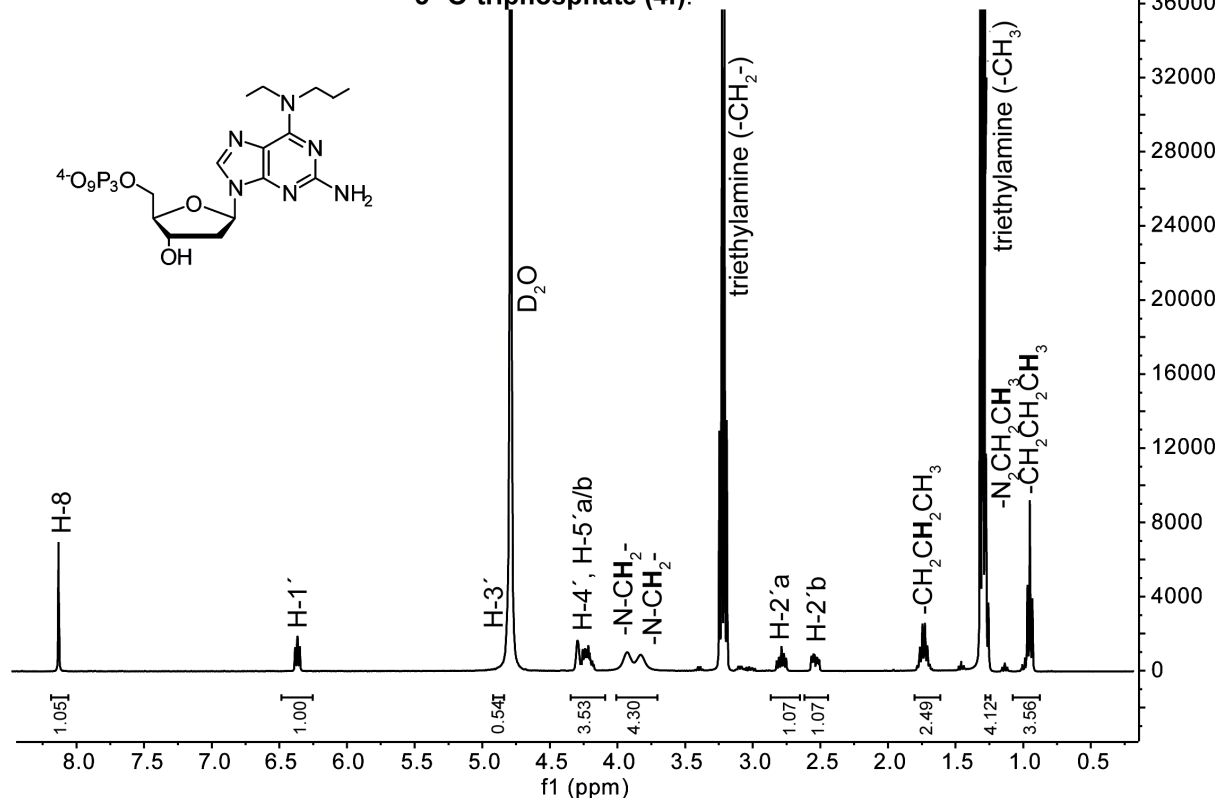

<sup>31</sup>P-NMR (162 MHz, D<sub>2</sub>O) of 6-Ethylpropylamino-2'-deoxyguanosine-5'-O-triphosphate (4f):

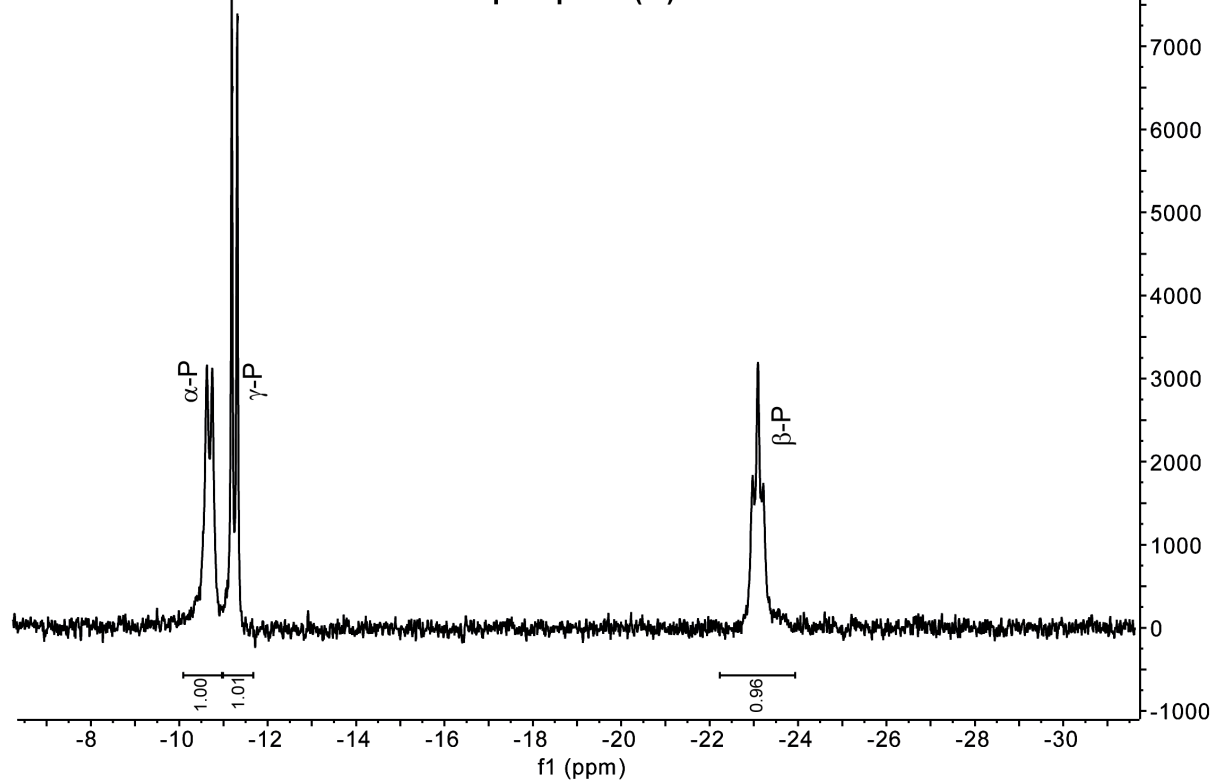

$^1\text{H}$ -NMR (400 MHz,  $\text{D}_2\text{O}$ ) of **6-Ethyl-iso-propylamino-2'-deoxyguanosine-5'-O-triphosphate (4g)**:

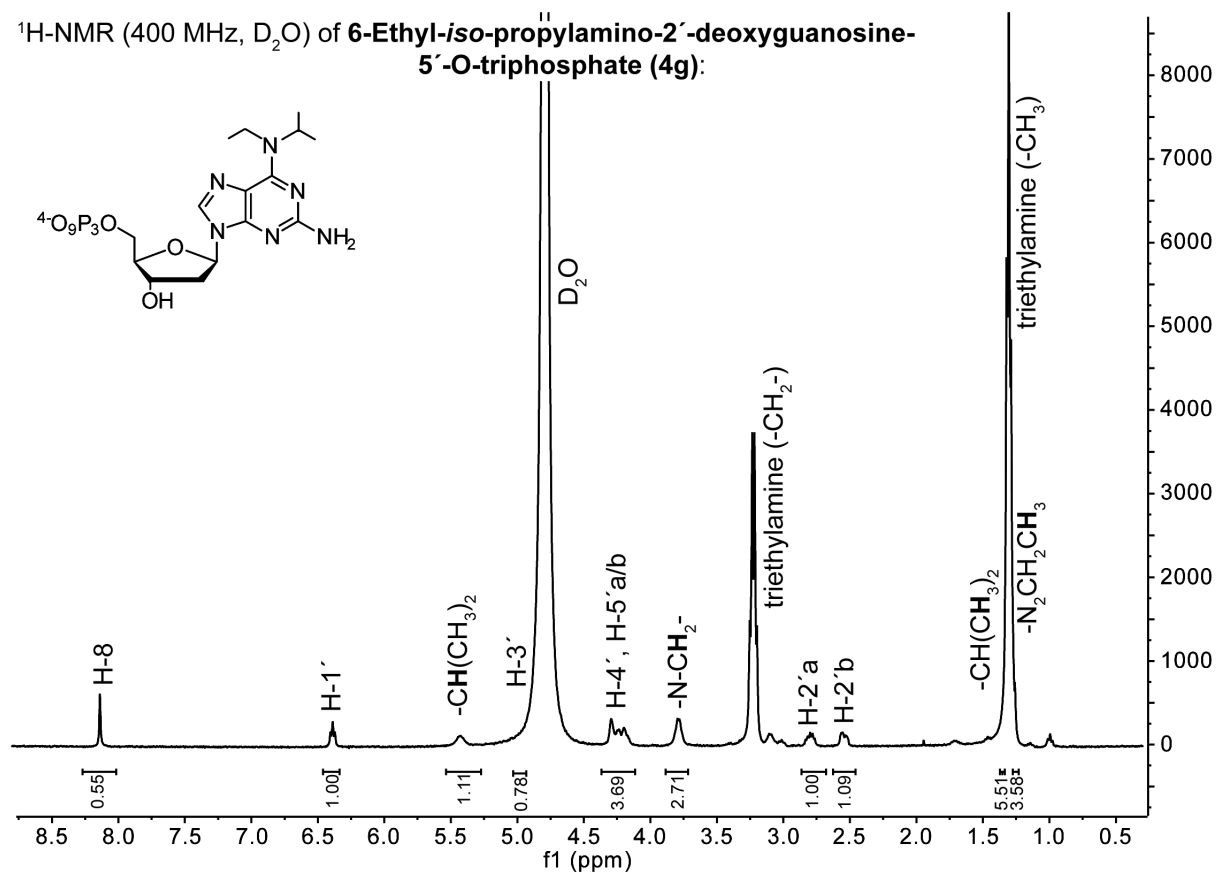

$^{31}\text{P}$ -NMR (162 MHz,  $\text{D}_2\text{O}$ ) of **6-Ethyl-iso-propylamino-2'-deoxyguanosine-5'-O-triphosphate (4g)**:

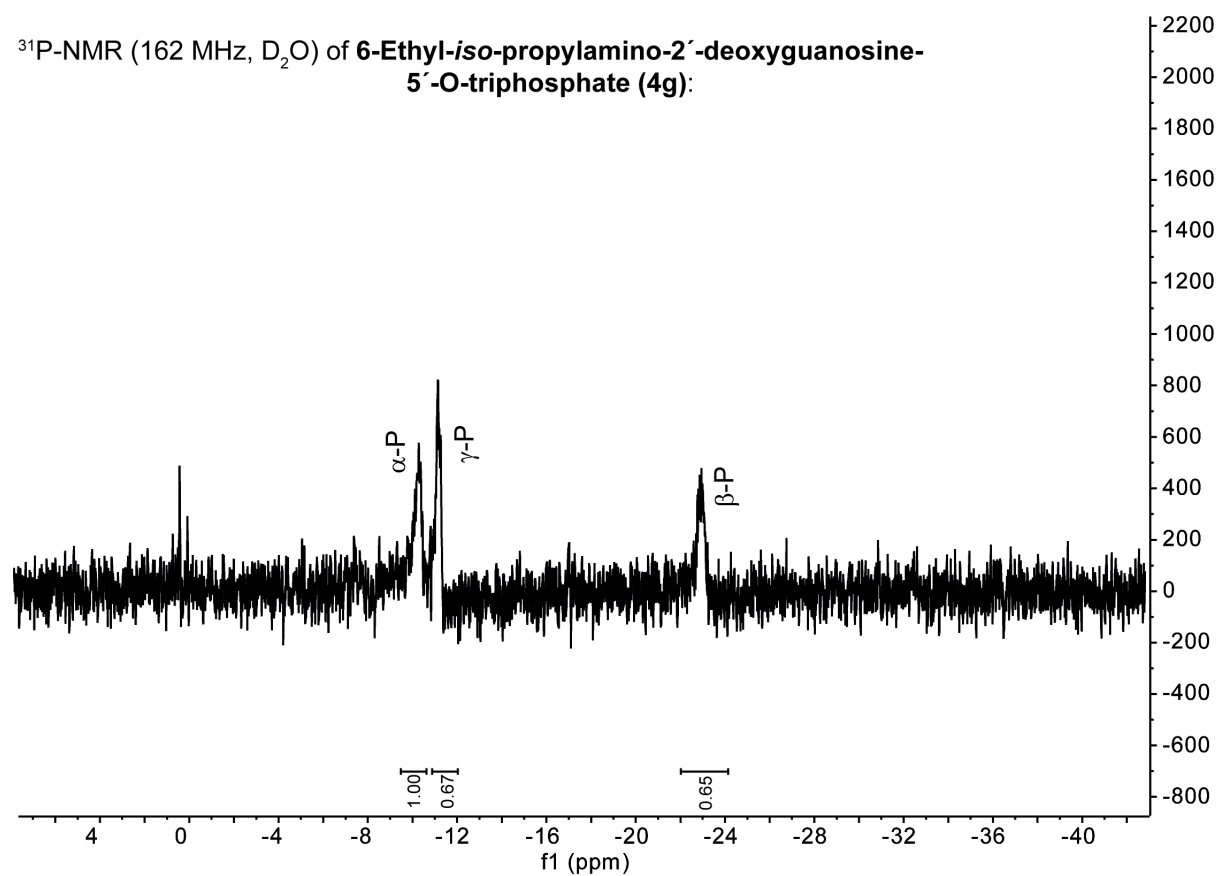

$^1\text{H}$ -NMR (400 MHz,  $\text{D}_2\text{O}$ ) of **6-Pyrrolidine-2'-deoxyguanosine-5'-O-triphosphate (4h)**:

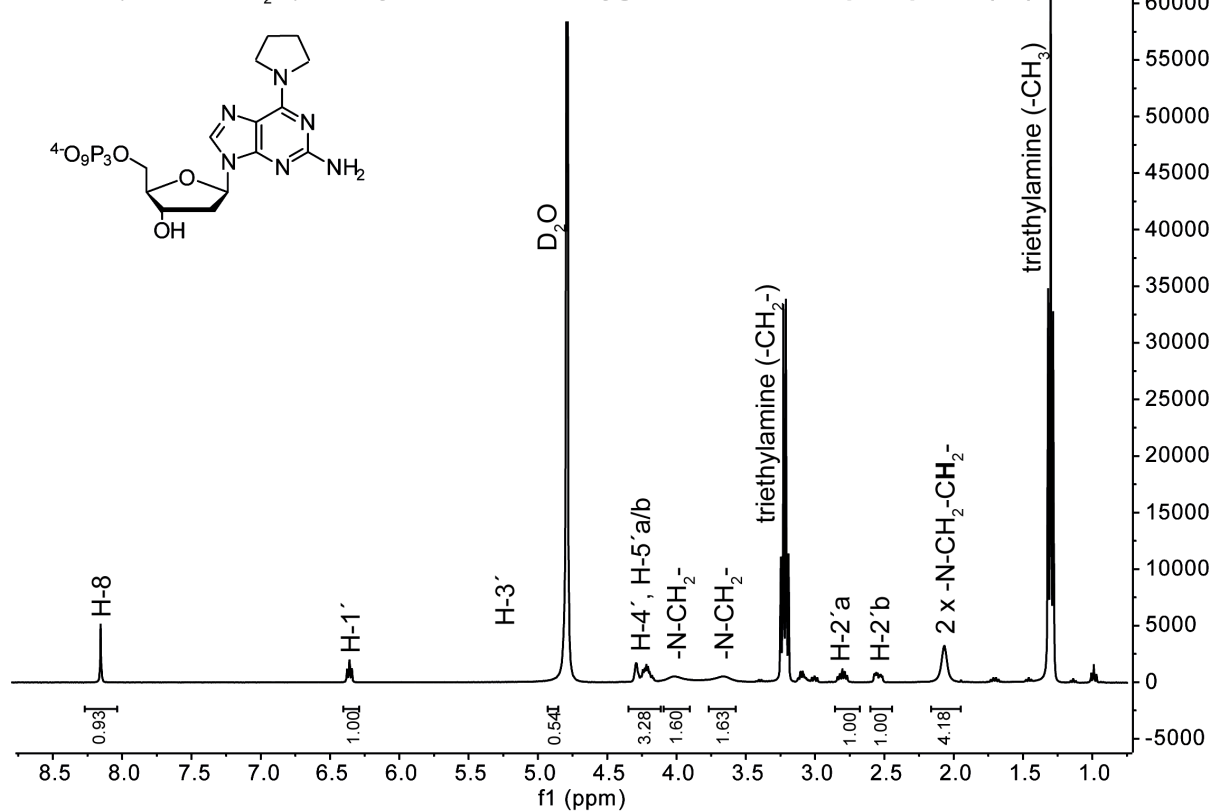

$^{31}\text{P}$ -NMR (162 MHz,  $\text{D}_2\text{O}$ ) of **6-Pyrrolidine-2'-deoxyguanosine-5'-O-triphosphate (4h)**:

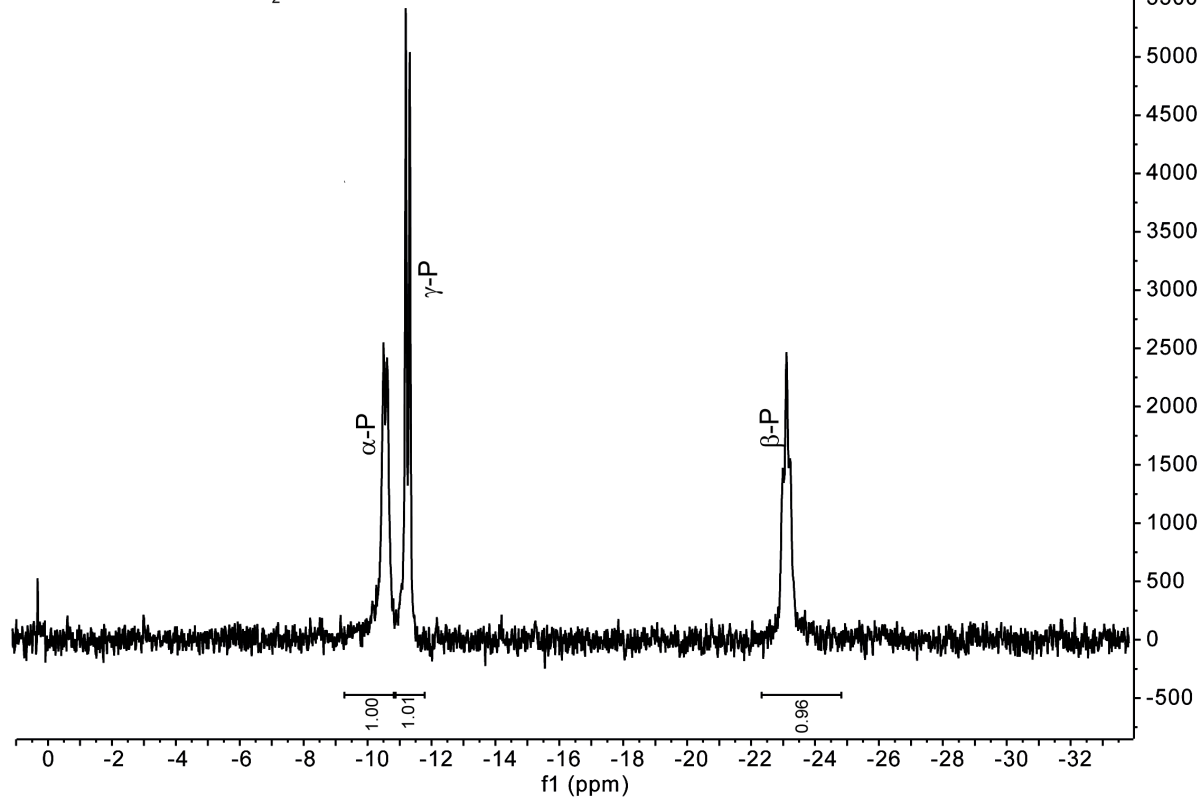

## HR-MS Spectra:

### 2-Amino-6-ethylthiopurine (5b):

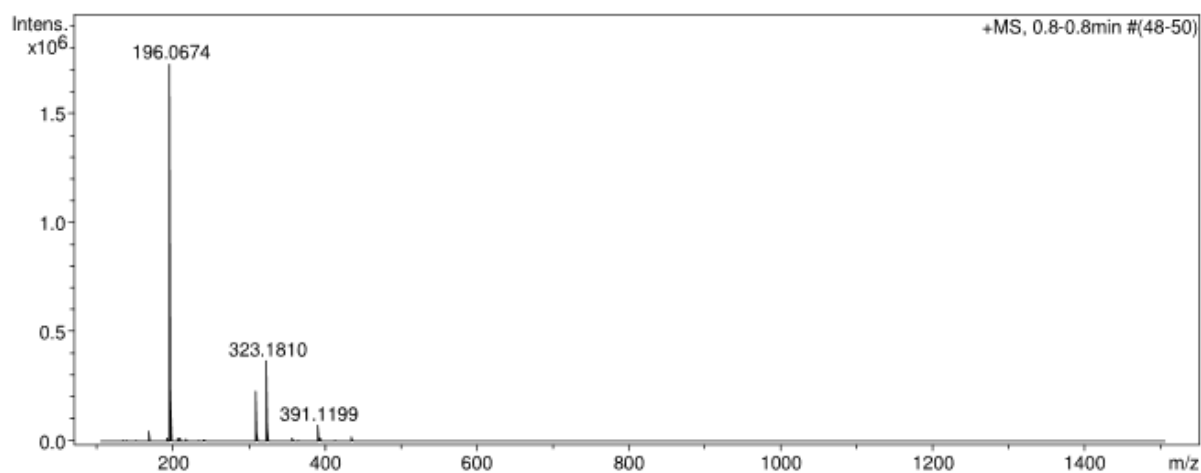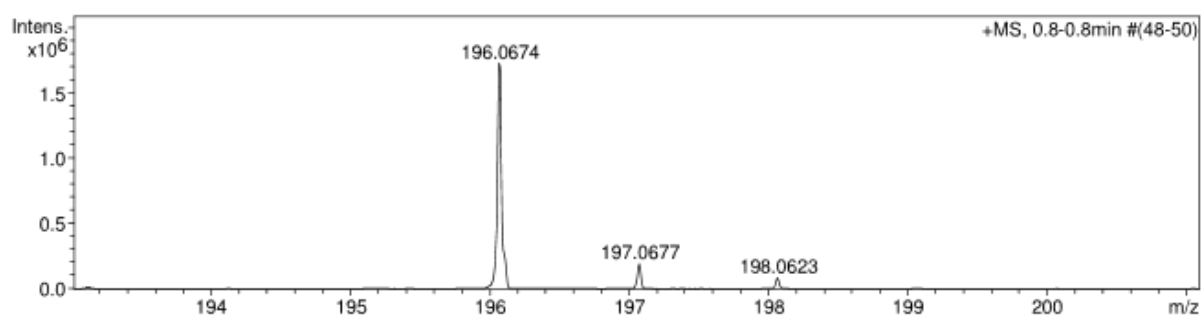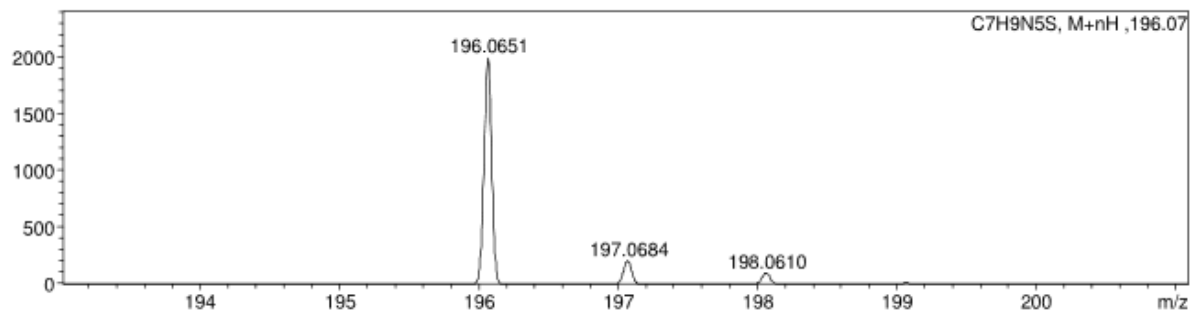

**6-Ethylthio-2'-deoxyguanosine (7b):**

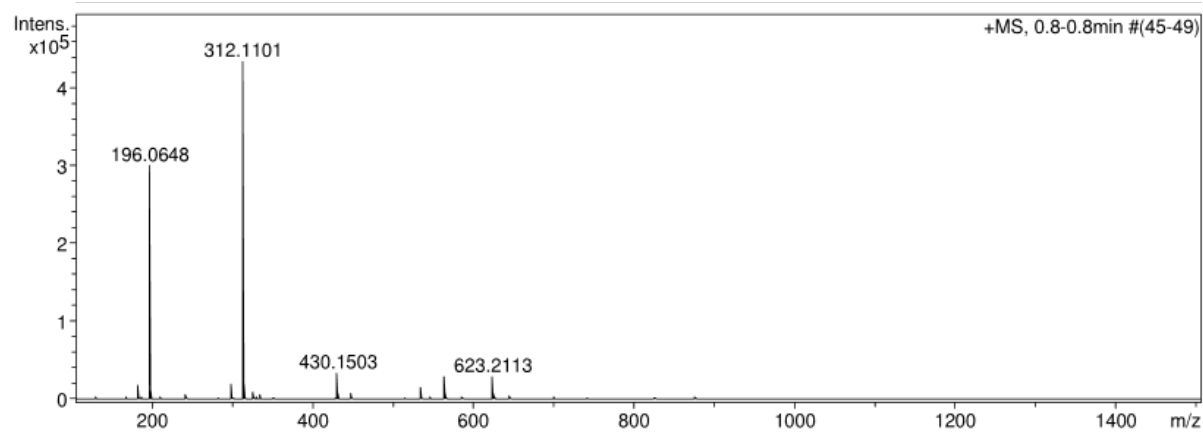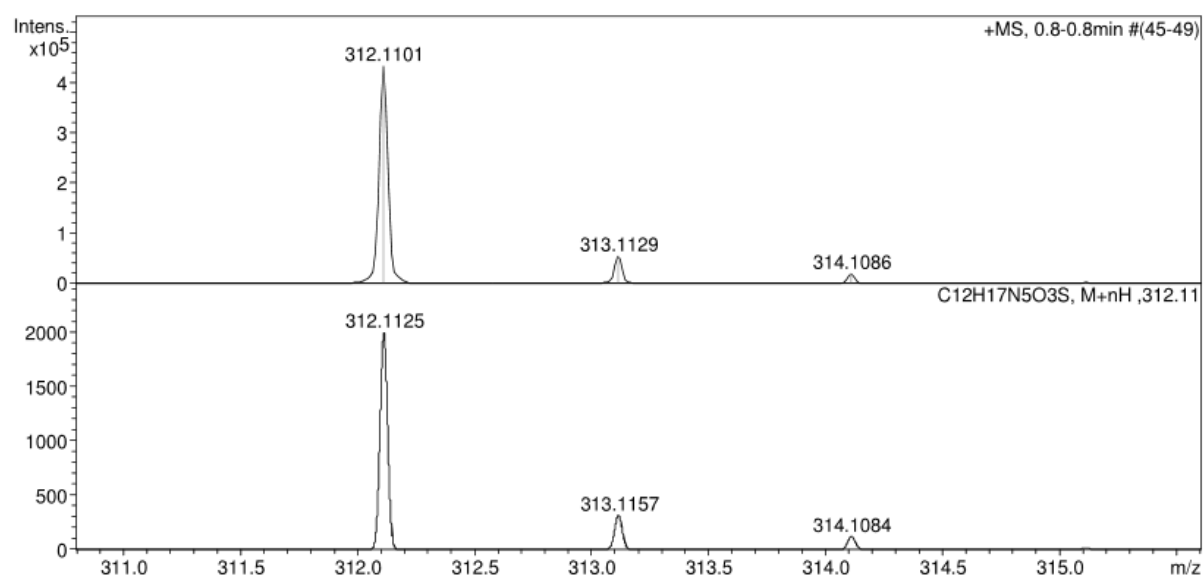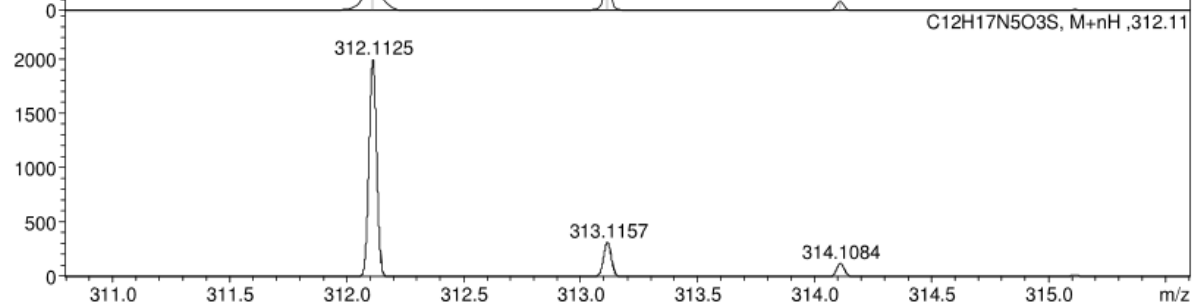

**3',5'-Di-*O*-*tert*-butyldimethylsilyl-6-chloro-2'-deoxyguanosine (8):**

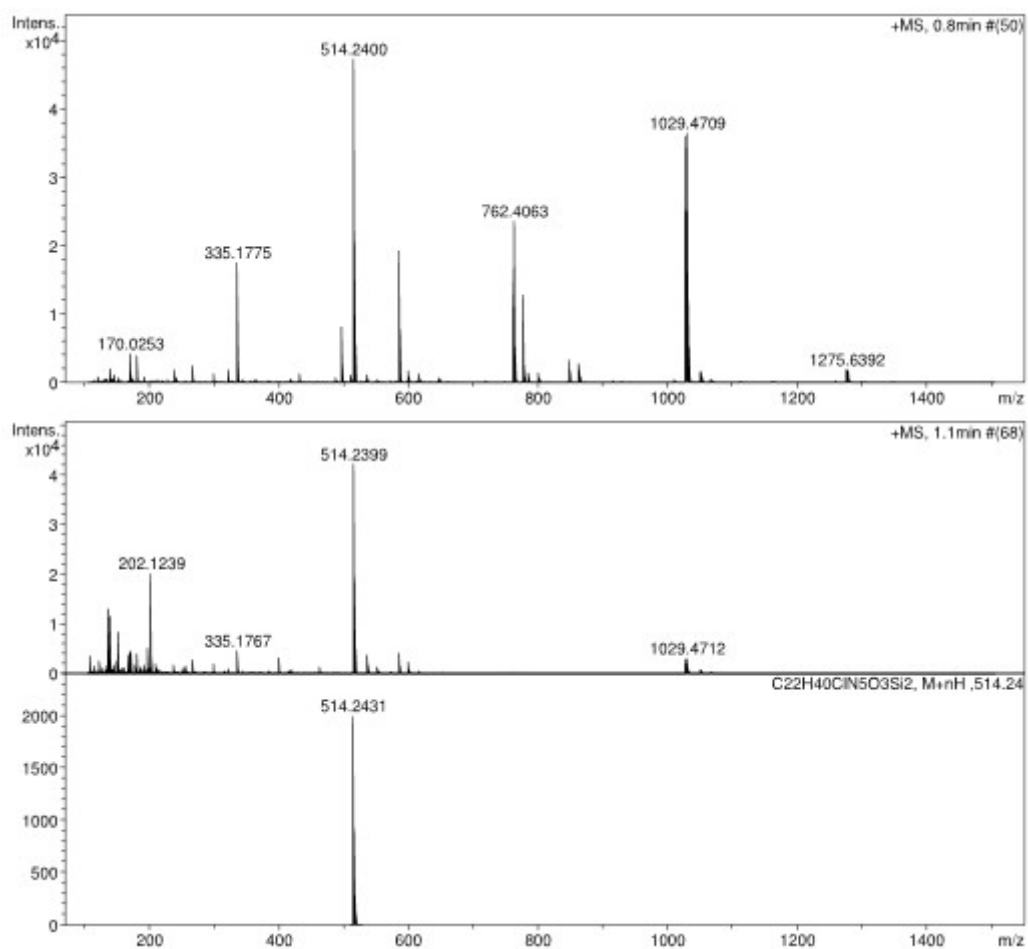

**6-Chloro-2'-deoxyguanosine (9):**

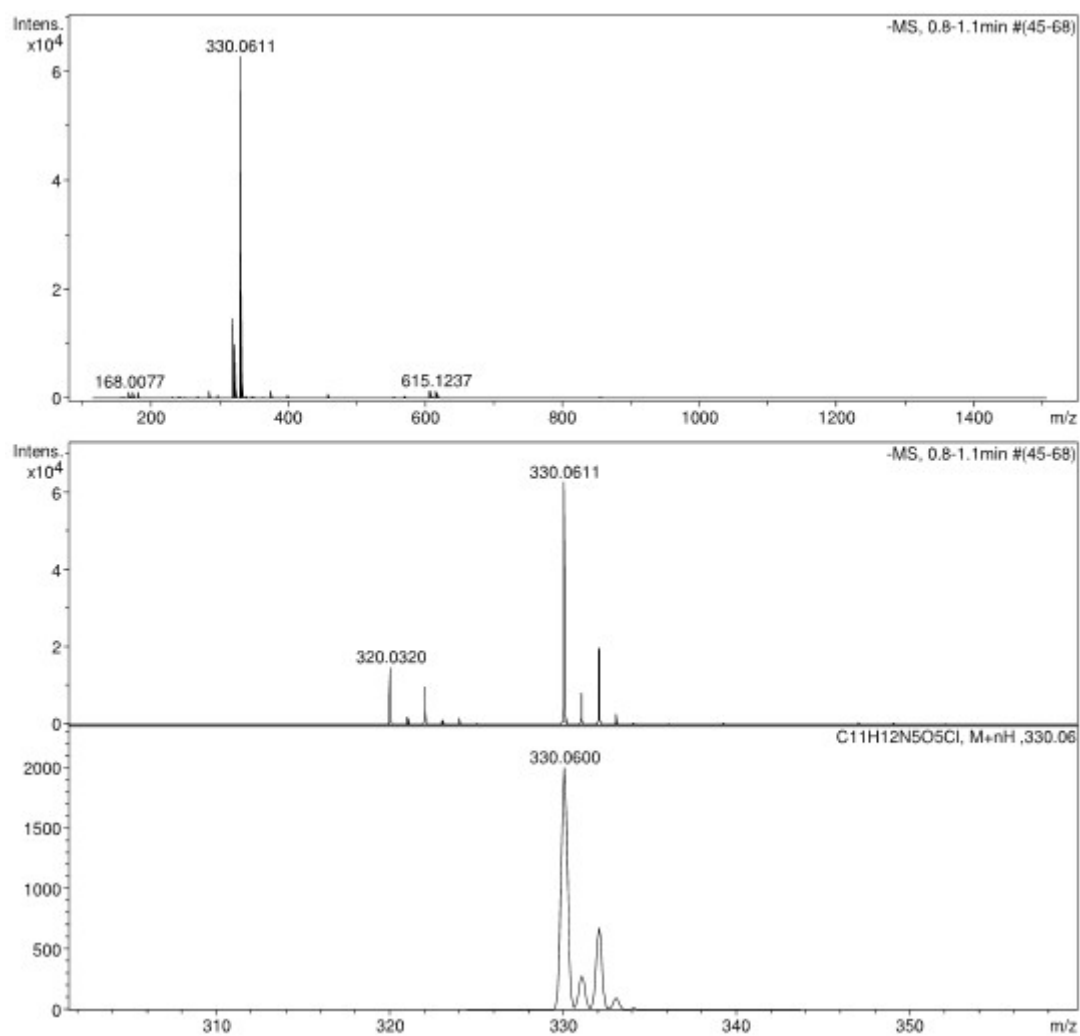

**6-Thioethyl-2'-deoxyguanosine-5'-O-triphosphate (2b):**

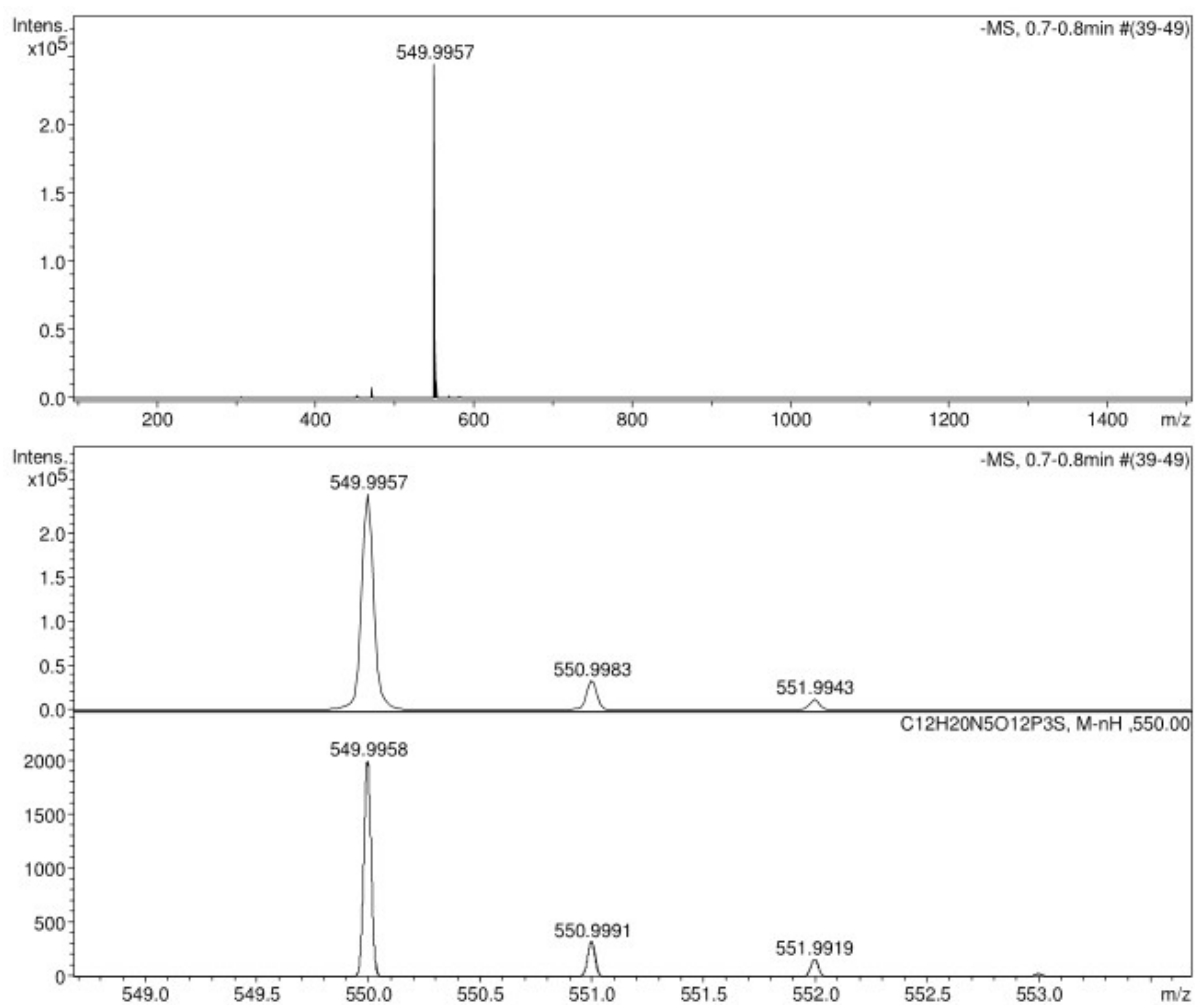

**2'-Deoxy-6-chloro-guanosine-5'-O-triphosphate (10):**

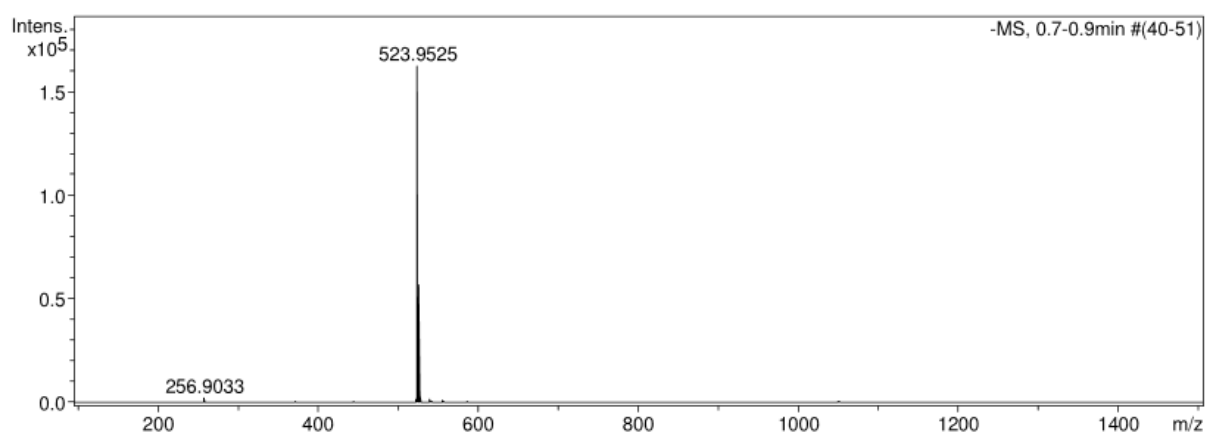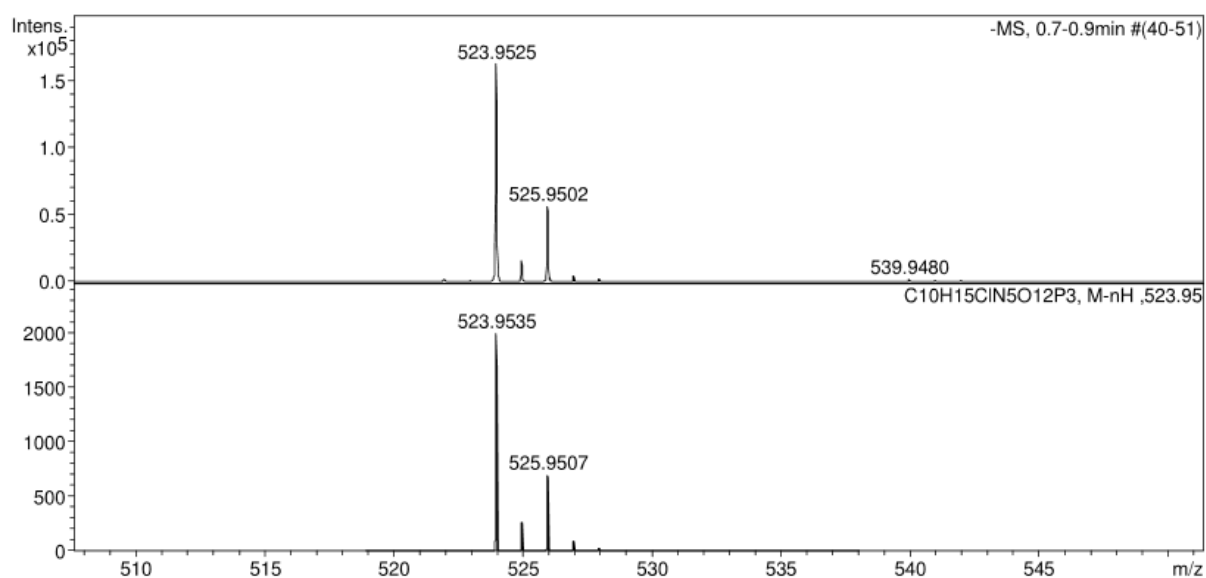

**6-(Methylamino)-2'-deoxyguanosine-5'-O-triphosphate (3a):**

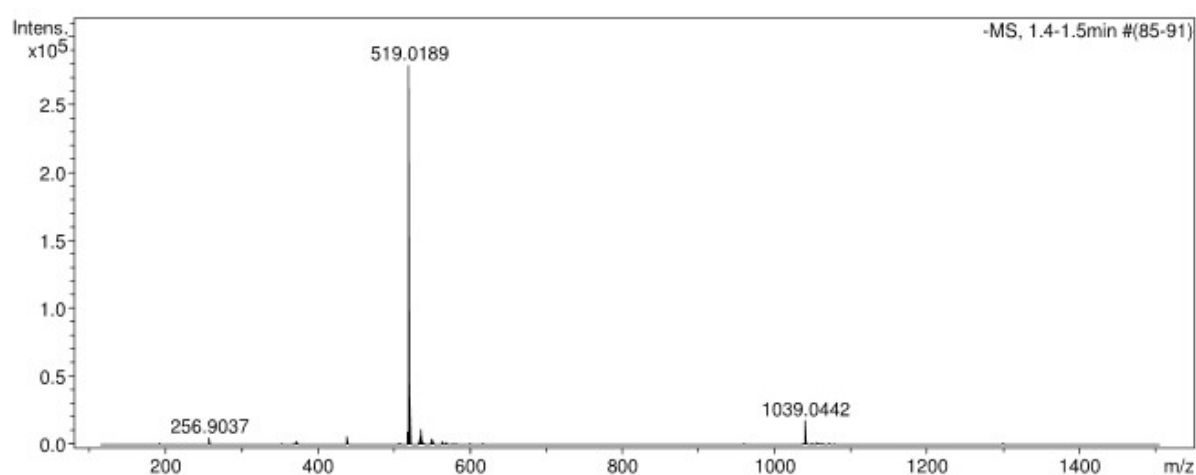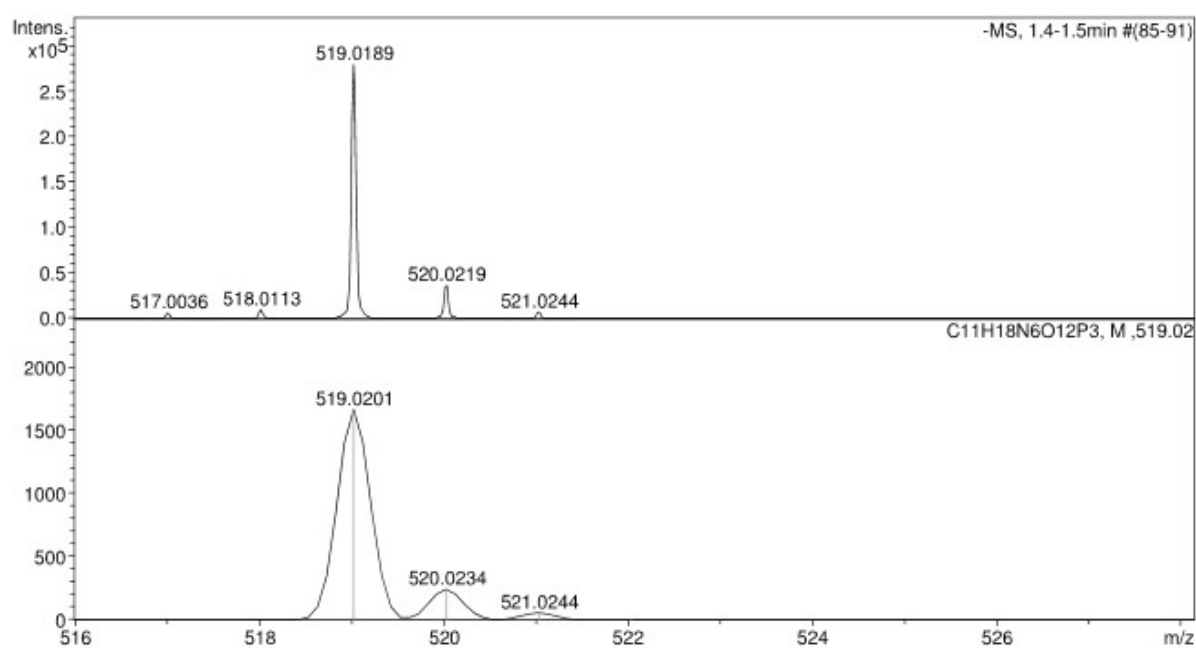

**6-(Ethylamino)-2'-deoxyguanosine-5'-O-triphosphate (3b):**

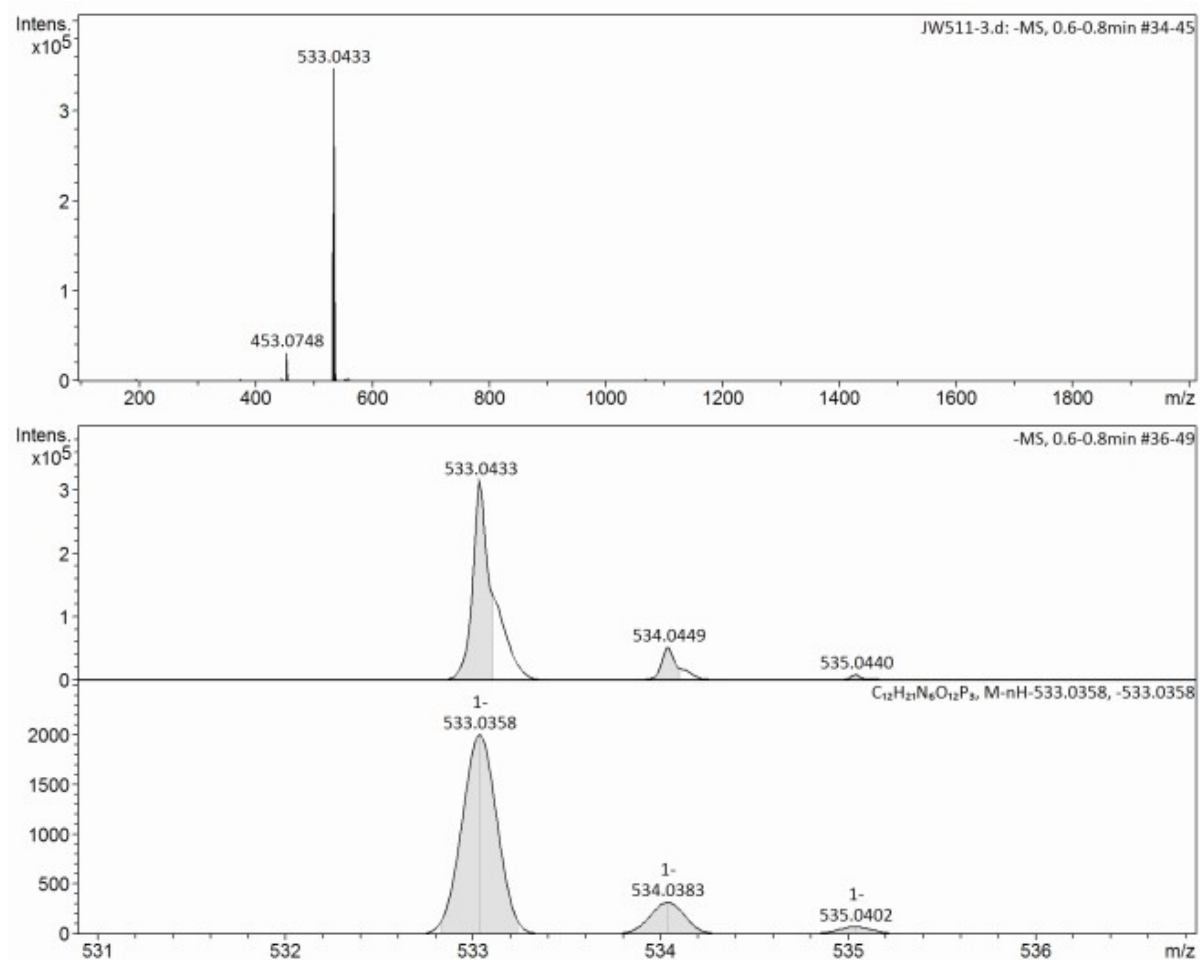

**6-(Propylamino)-2'-deoxyguanosine-5'-O-triphosphate (3c):**

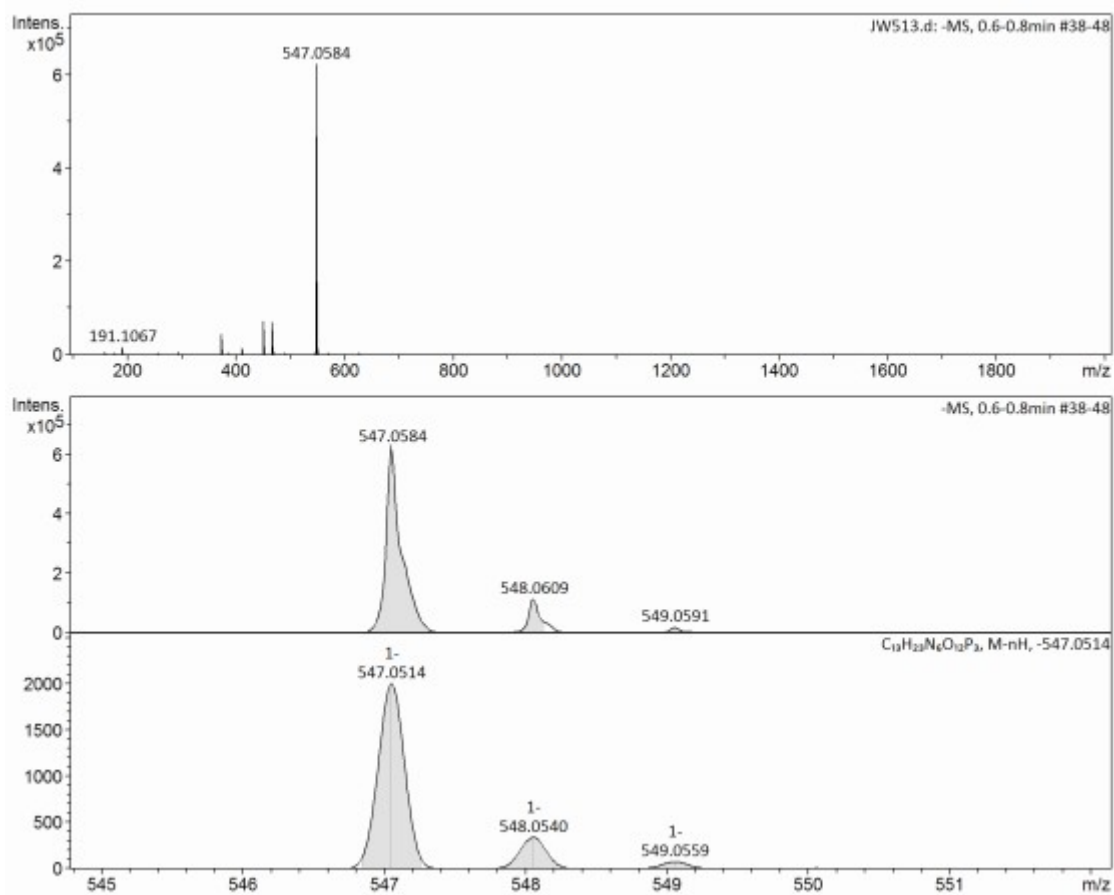

**6-(*iso*-Propylamino)-2'-deoxyguanosine-5'-O-triphosphate (3d):**

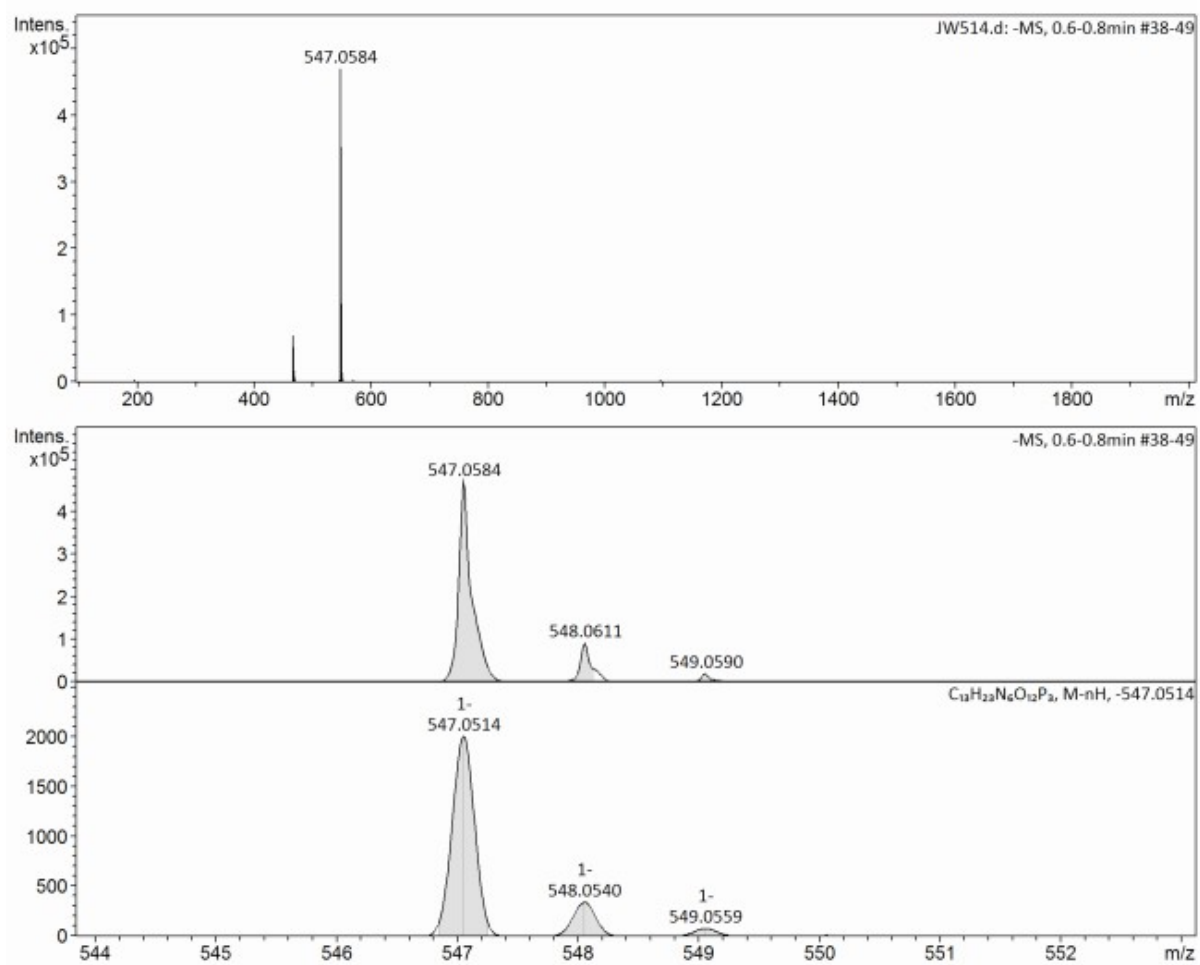

**6-(Cyclohexylamino)-2'-deoxyguanosine-5'-O-triphosphate (3e):**

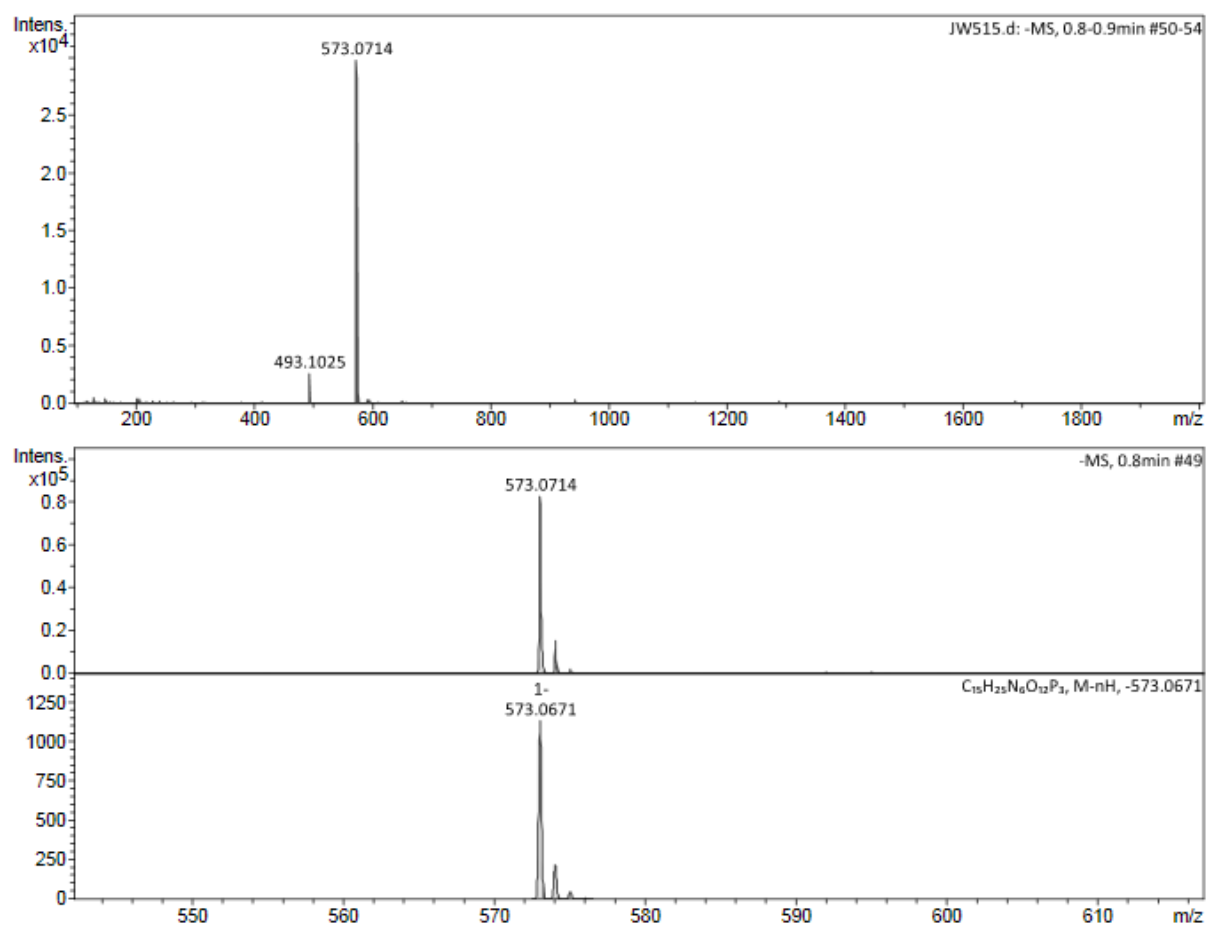

**6-(Azido-1-propanamino)-2'-deoxyguanosine-5'-O-triphosphate (3f):**

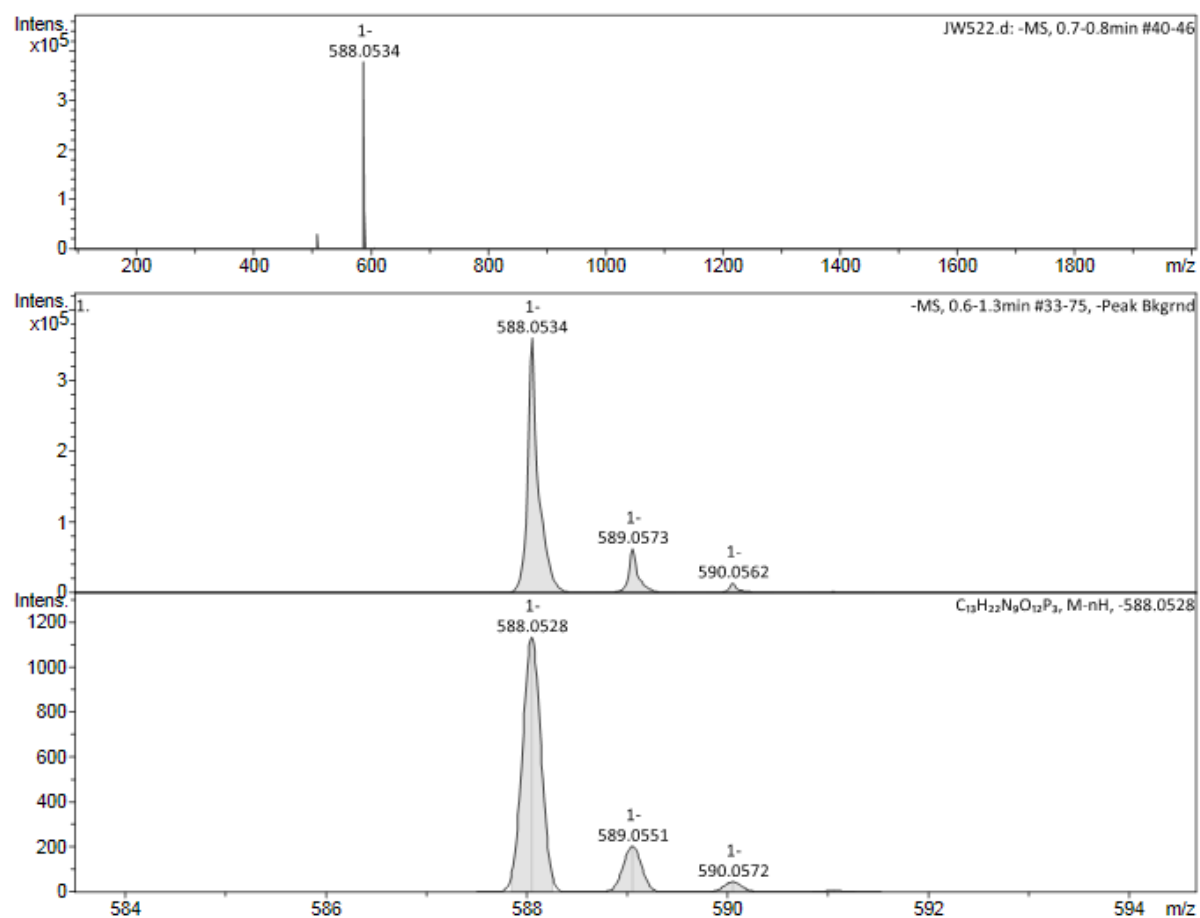

**6-(Hydroxy-1-ethanamino)-2'-deoxyguanosine-5'-O-triphosphate (3g):**

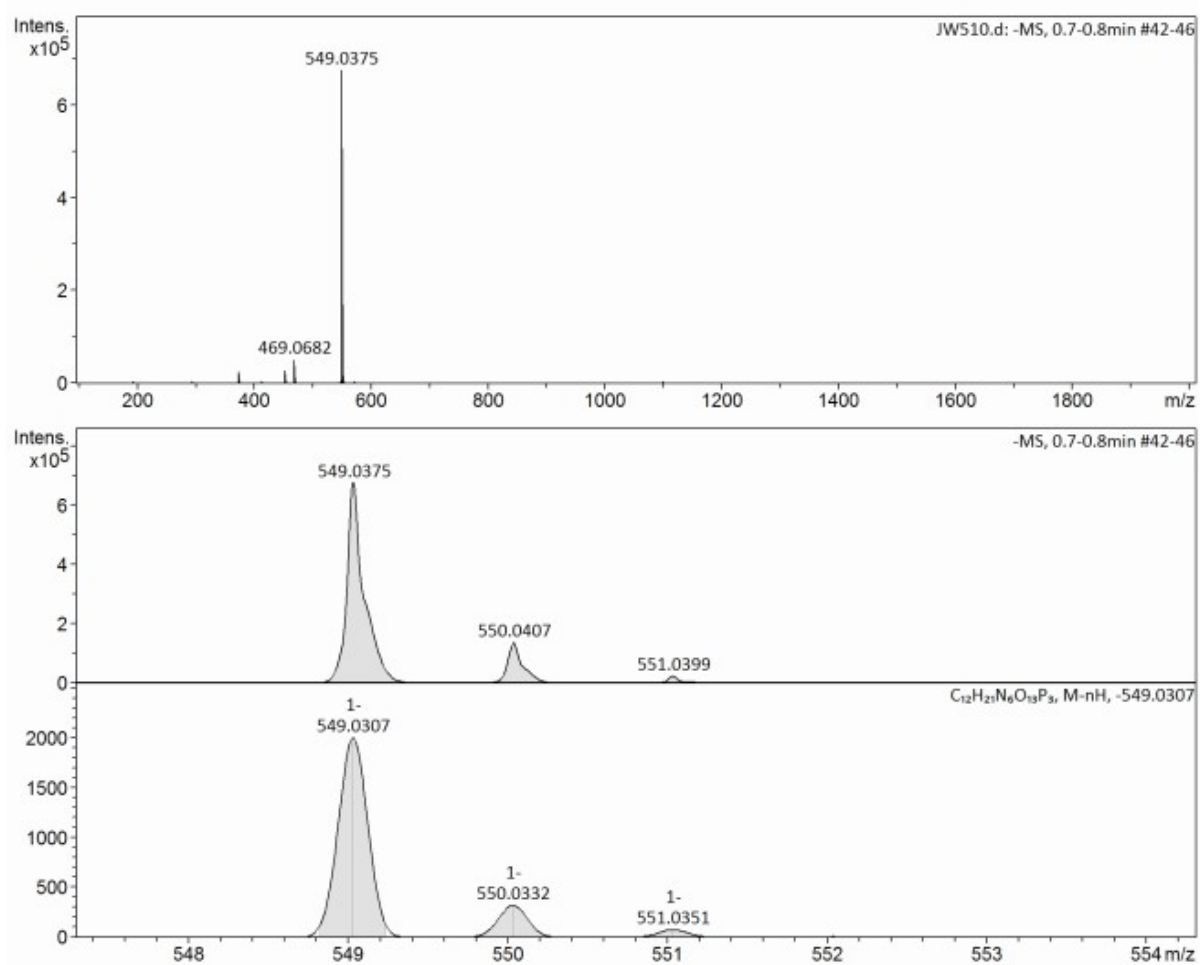

**6-Dimethylamino-2'-deoxyguanosine-5'-O-triphosphate (4a):**

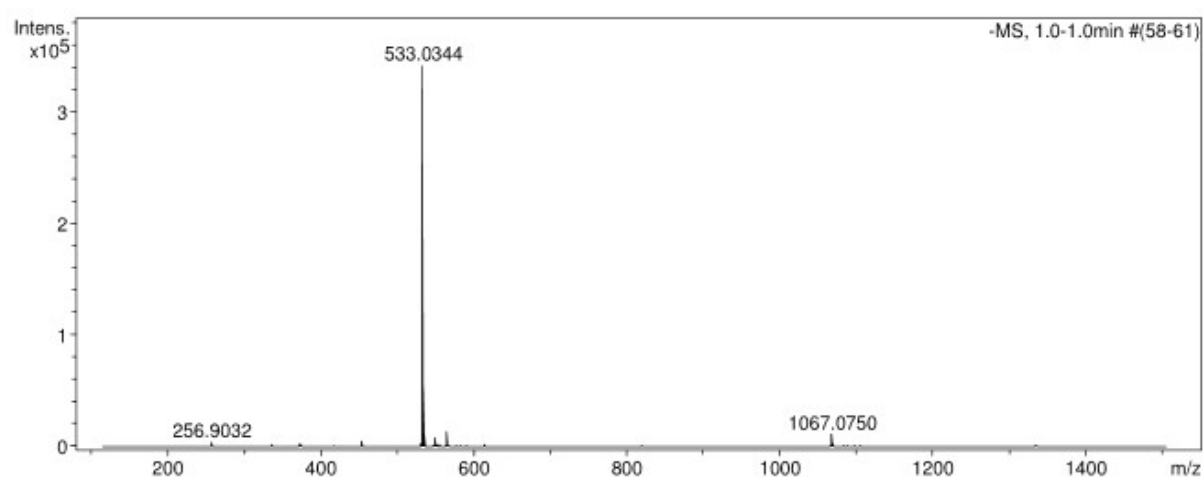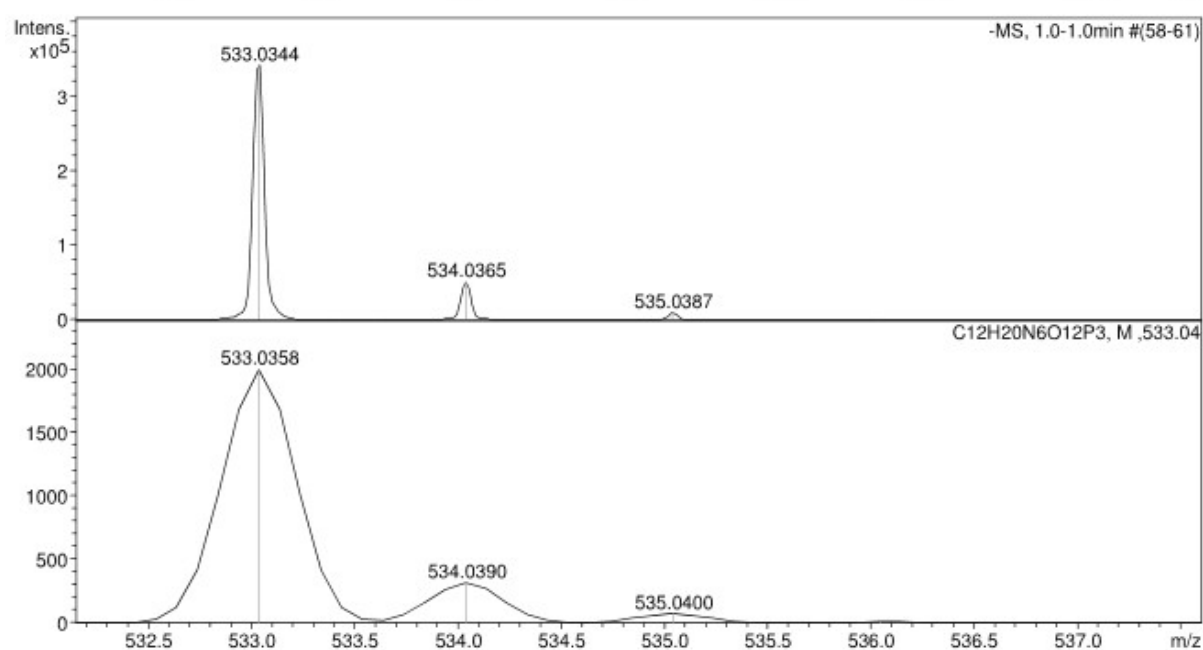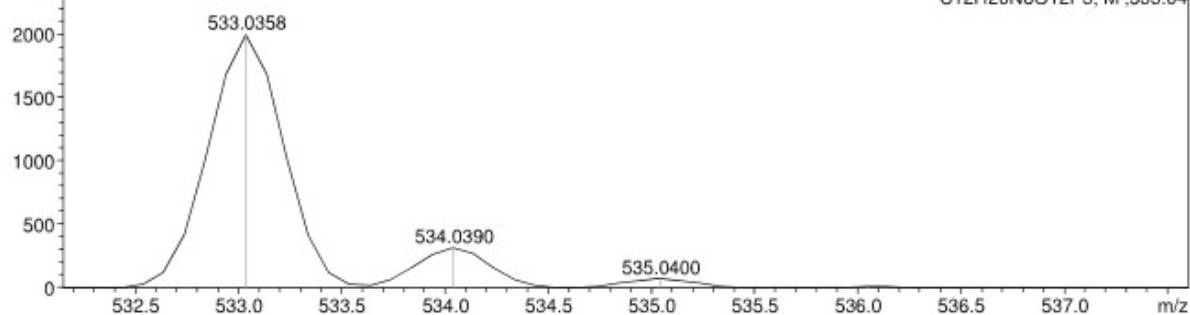

**6-Methylethylamino-2'-deoxyguanosine-5'-O-triphosphate (4b):**

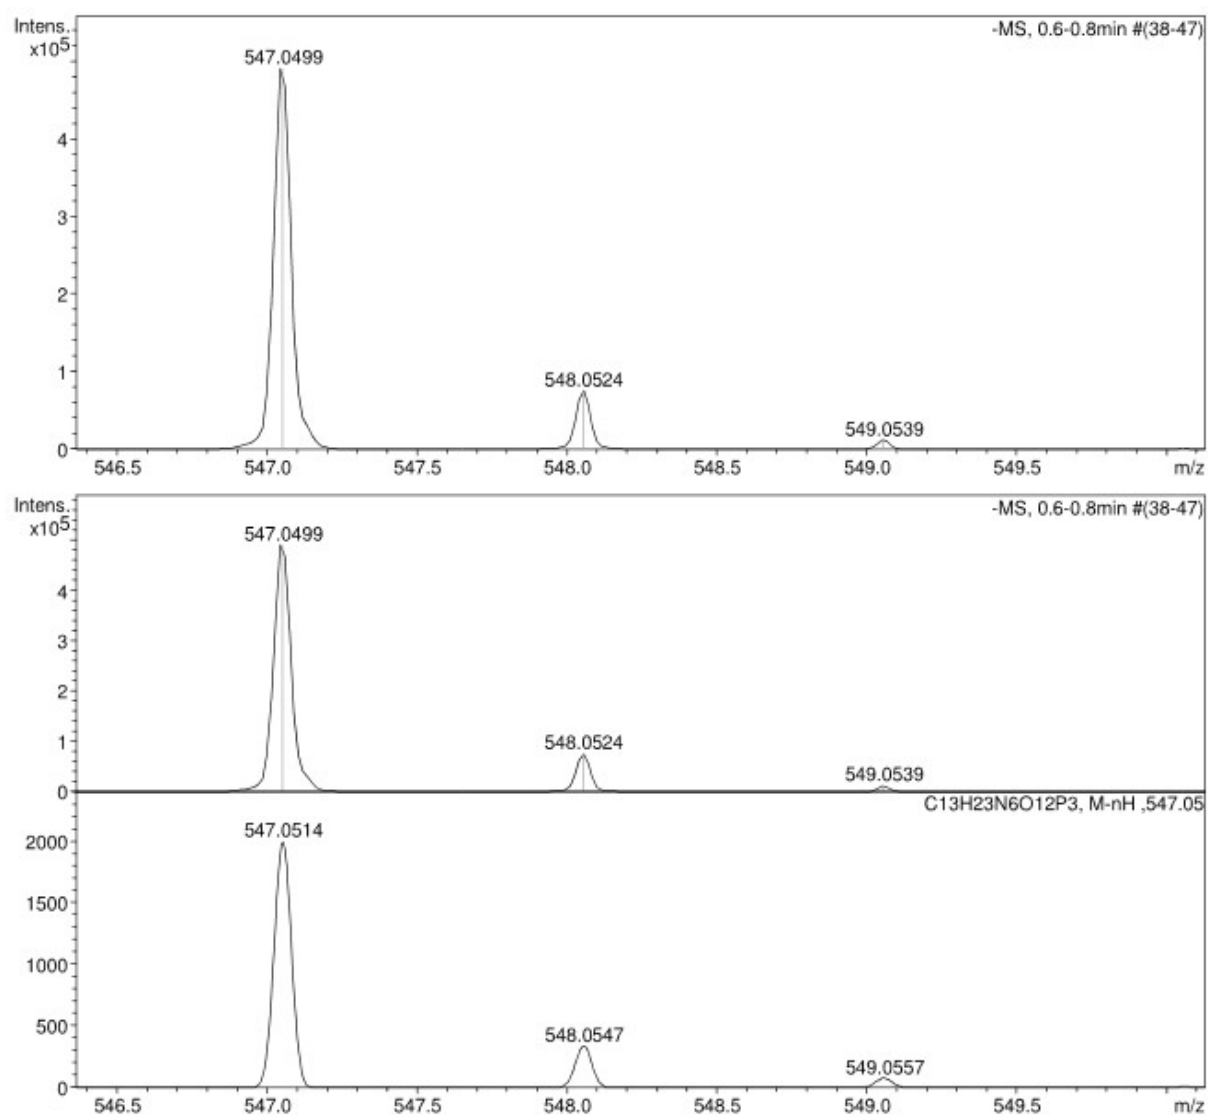

**6-Methylpropylamino-2'-deoxyguanosine-5'-O-triphosphate (4c):**

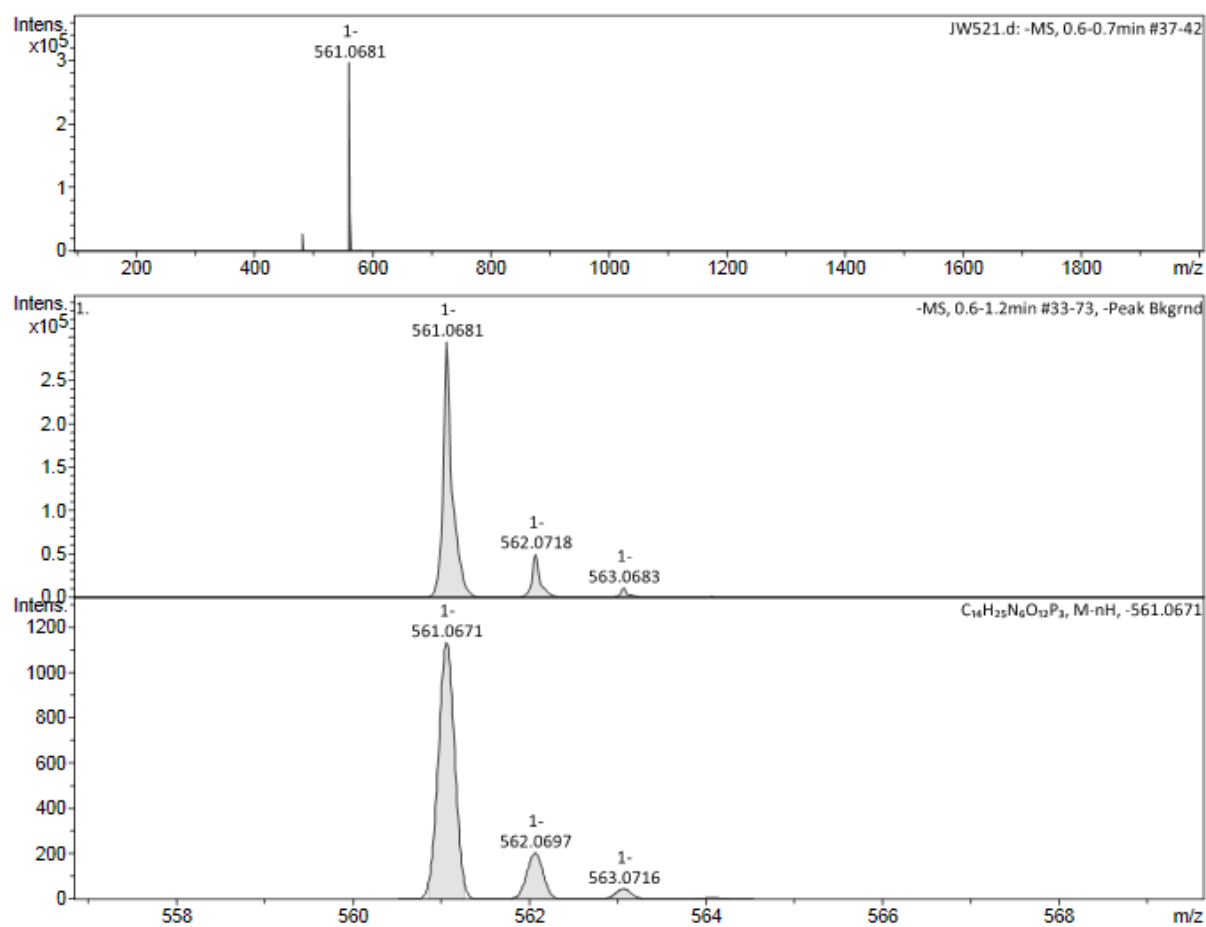

**6-Methyl-*iso*-propylamino-2'-deoxyguanosine-5'-O- triphosphate (4d):**

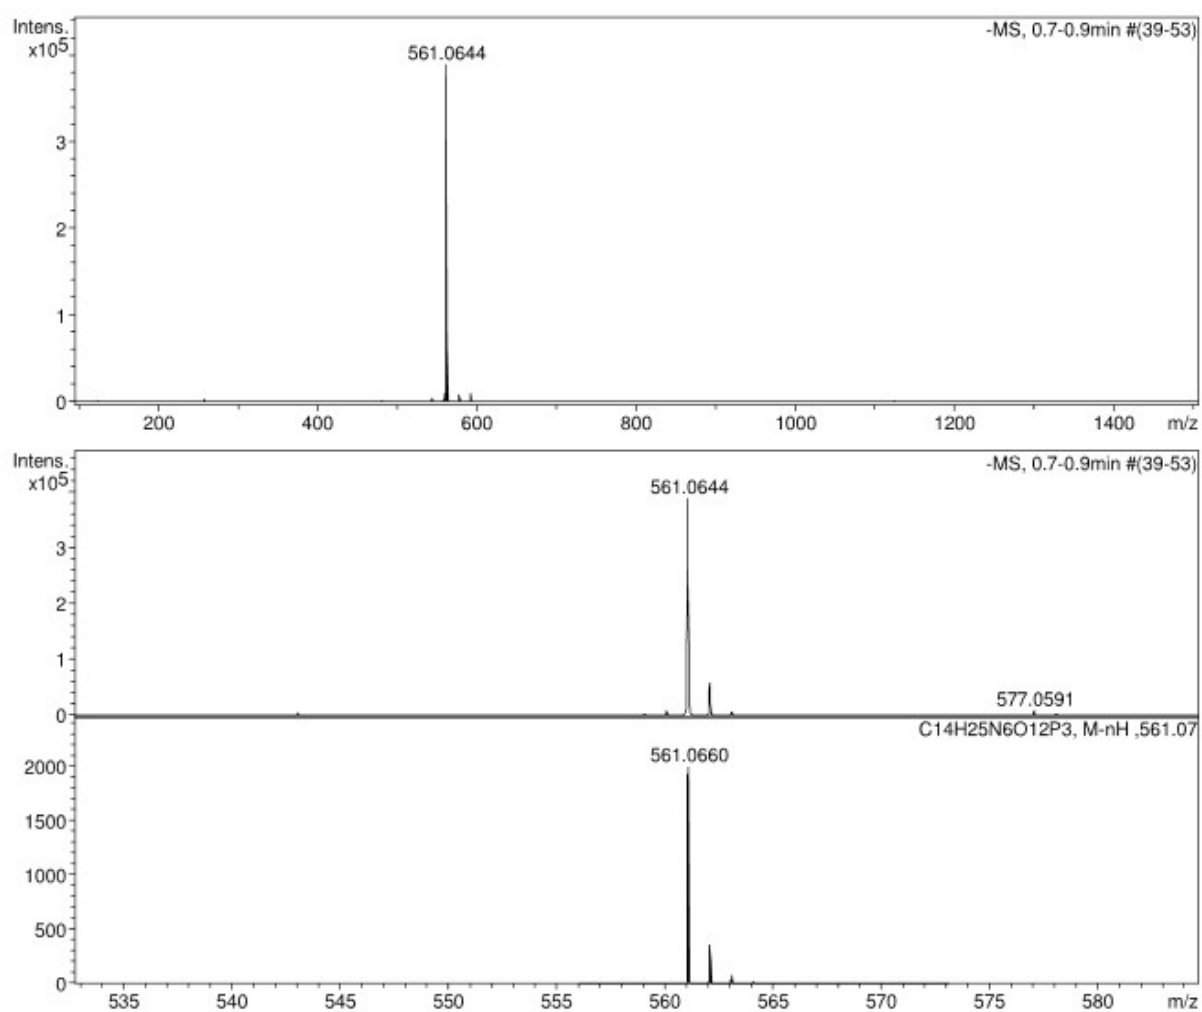

**6-Diethylamino-2'-deoxyguanosine-5'-O-triphosphate (4e):**

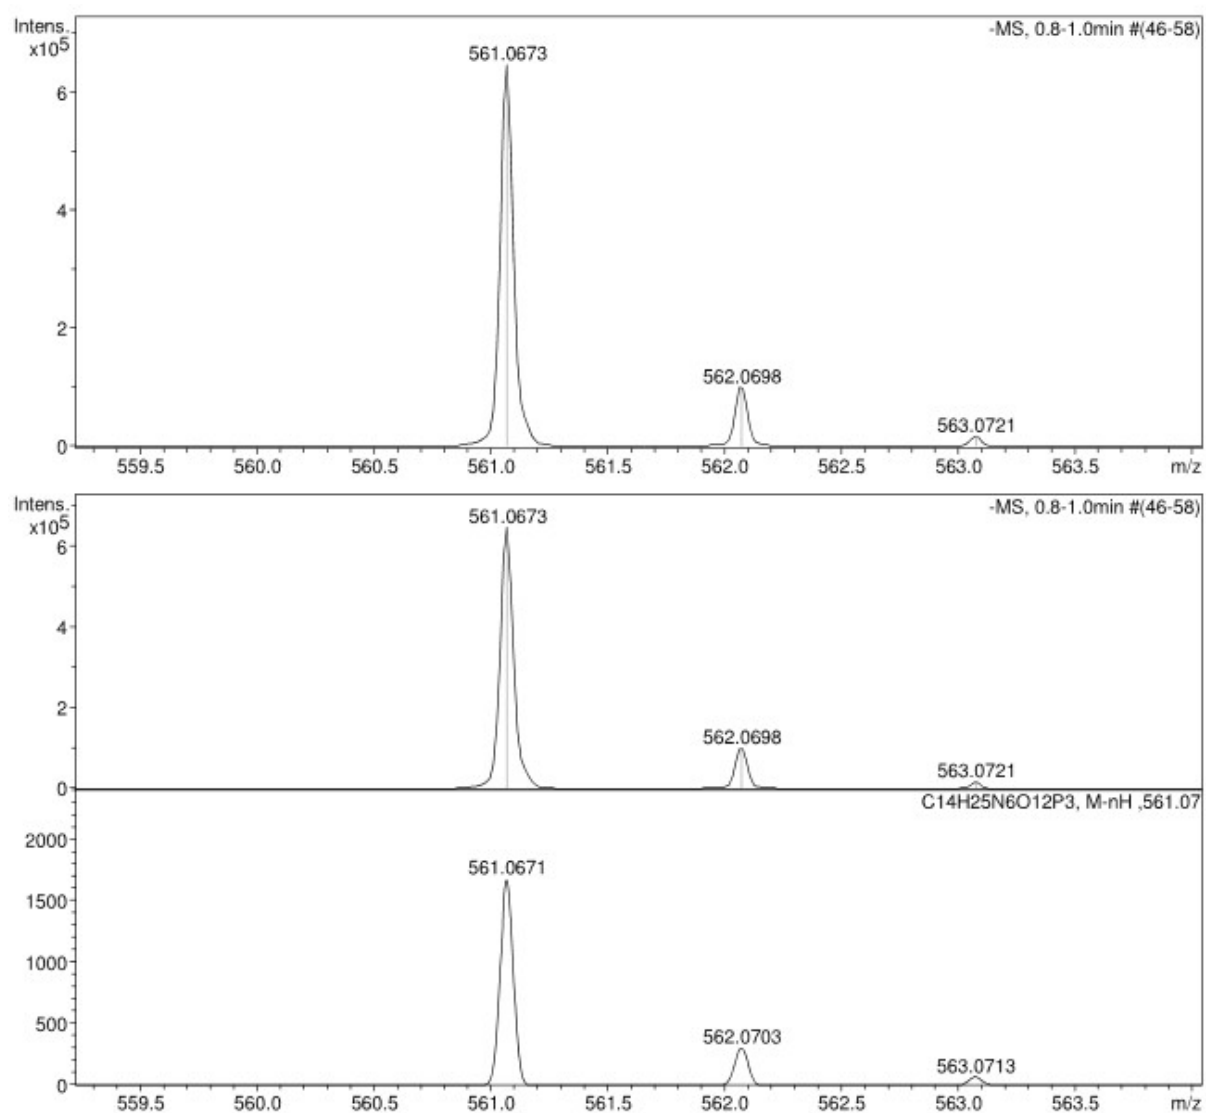

**6-Ethylpropylamino-2'-deoxyguanosine-5'-O-triphosphate (4f):**

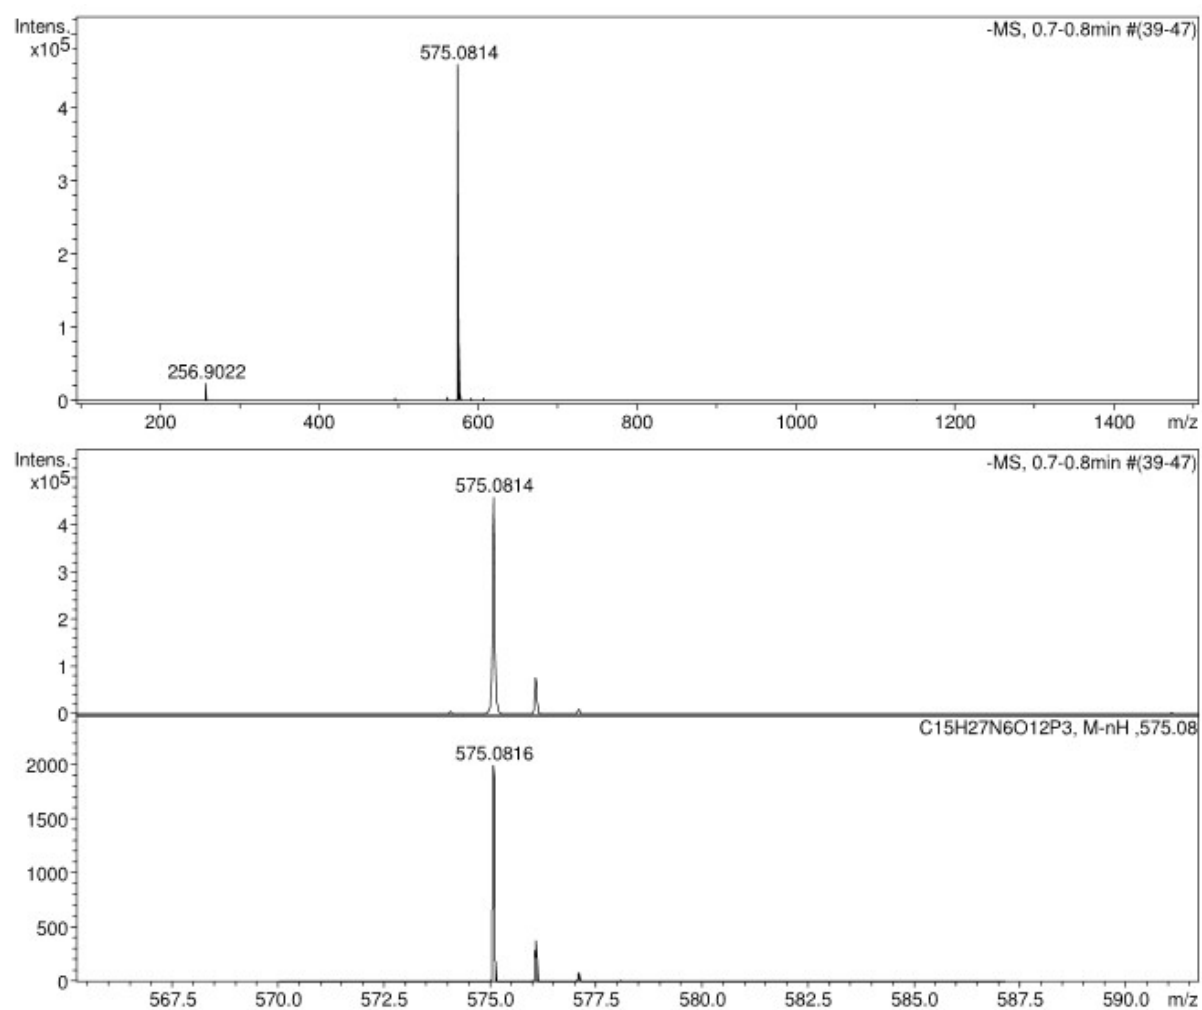

**6-Ethyl-iso-propylamino-2'-deoxyguanosine-5'-O-triphosphate (4g):**

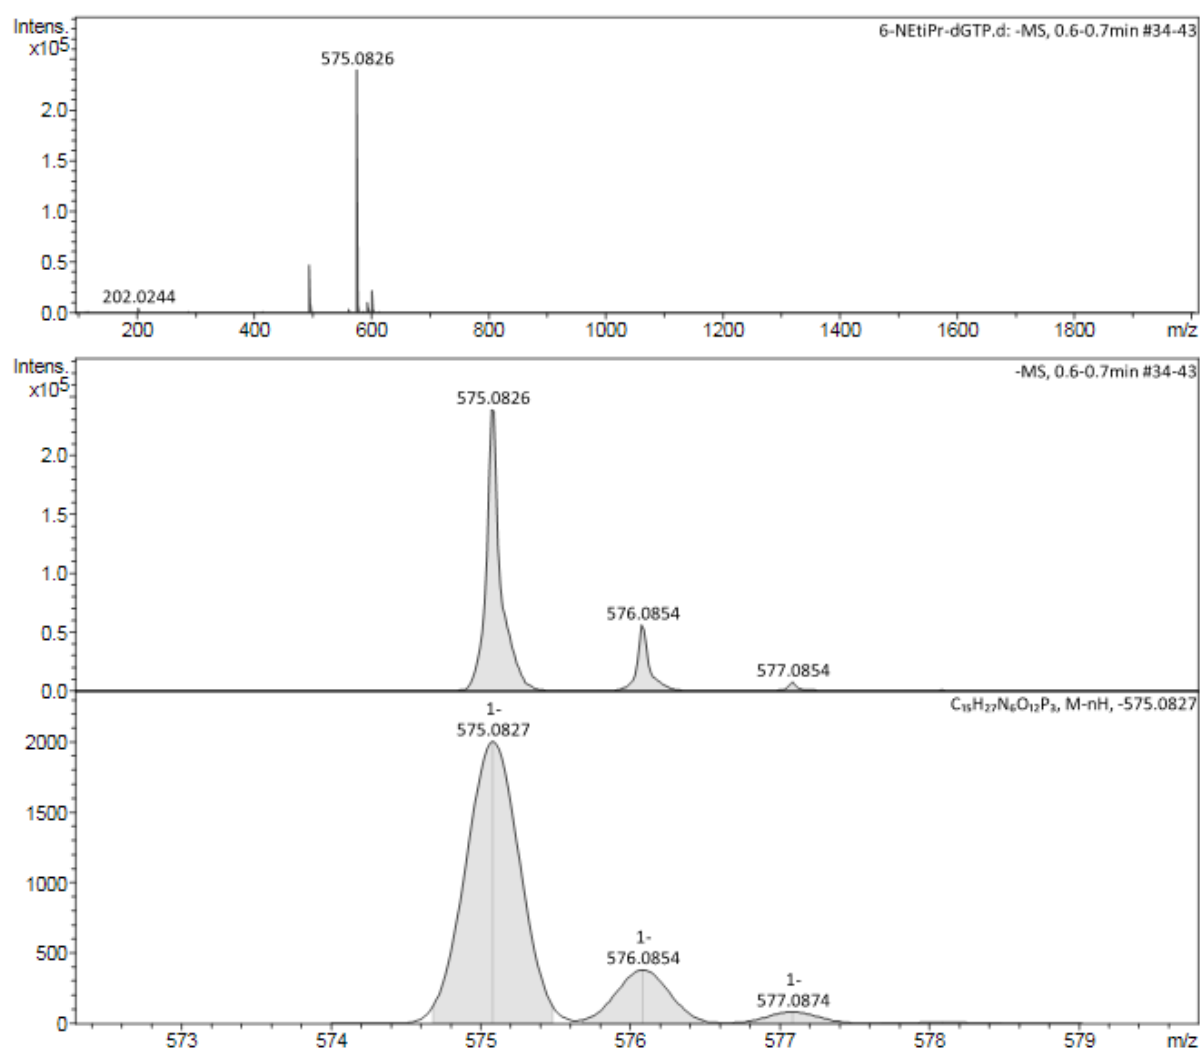

**6-Pyrrolidine-2'-deoxyguanosine-5'-O-triphosphate (4h):**

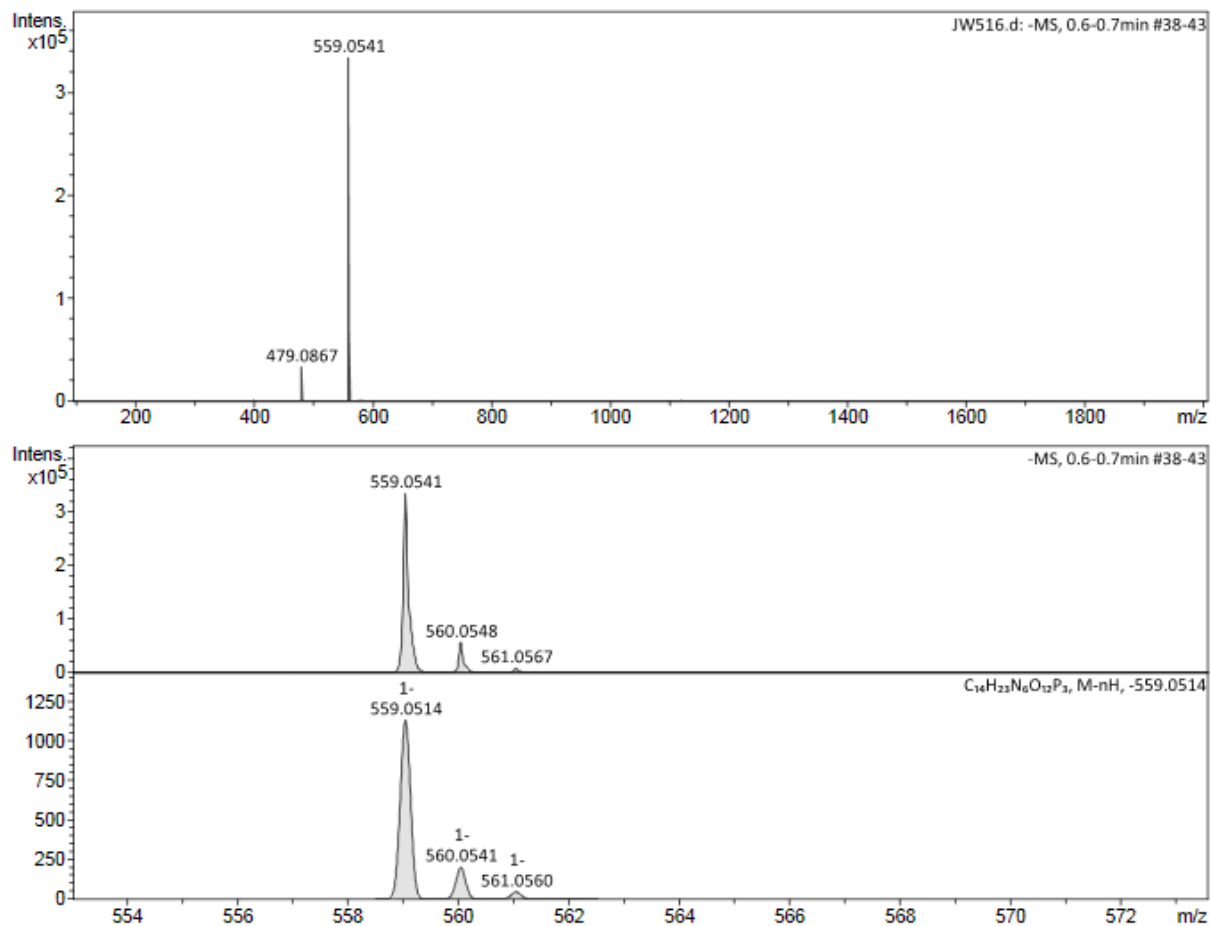

## References:

- [1] L.K. Huang, Y.C. Cherng, *et al.*, *Tetrahedron* **2007**, 63, 5323-5327
- [2] K. Ramasamy, N. Imamura, R.K. Robins, G.R. Revankar, *J. Heterocycl. Chem.* **1988**, 25, 1893-1898
- [3] N.B. Hanna, B.K. Bhattacharya, *et al.* *J. Med. Chem.*, **1994**, 37, 177-183.
- [4] J. Woo, S.T. Sigurdsson, P.B. Hopkins, *J. Am. Chem. Soc.* **1993**, 115, 3407-3415.
- [5] E. Nandanan, E. Camaioni, S. Y. Jang, Y. C. Kim, G. Cristalli, P. Herdewijn, J. A. Secrist, 3rd, K. N. Tiwari, A. Mohanram, T. K. Harden, J. L. Boyer, K. A. Jacobson, *J. Med. Chem.* 1999, 42, 1625-1638.
- [6] a) M. Yoshikawa, T. Kato, T. Takenish, *Bull. Chem. Soc. Jpn.* **1969**, 42, 3505. b) T. Kovacs, L. Otvos, *Tetrahedron Lett.* **1988**, 29, 4525-4528.
